# Supplementary material for: Stereoselective, nitro-Mannich/lactamisation cascades for the direct synthesis of heavily decorated 5-nitropiperidin-2-ones and related heterocycles
Source: publisher site journal article supplement (doi:10.3762/bjoc.8.64), 2012-04-16
Supplement: Additional file 1 [file 1860-5397-8-64-S1.pdf]

## Supporting Information

for

### **Stereoselective, nitro-Mannich/lactamisation cascades for the direct synthesis of heavily decorated 5-nitropiperidin-2-ones and related heterocycles**

**Pavol Jakubec<sup>1</sup>, Dane M. Cockfield<sup>2</sup>, Madeleine Helliwell<sup>2</sup>, James Raftery<sup>2</sup> and Darren J. Dixon<sup>\*1</sup>**

Address: <sup>1</sup>The Department of Chemistry, Chemistry Research Laboratory, University of Oxford, Mansfield Road, Oxford OX1 3TA, U.K. and <sup>2</sup>School of Chemistry, The University of Manchester, Oxford Road, Manchester, M13 9PL

E-mail: Darren Dixon - [Darren.dixon@chem.ox.ac.uk](mailto:Darren.dixon@chem.ox.ac.uk)

\*Corresponding author

General experimental, copies of <sup>1</sup>H and <sup>13</sup>C NMR spectra for all new compounds  
**(1a–j, 2a, 2a'', 2m, 2m', 6b–e, 10a–d, 11a–c, 12a,b)**

# Content

|                                                                                                |     |
|------------------------------------------------------------------------------------------------|-----|
| <b>1. General experimental</b>                                                                 | S4  |
| 1.1. Solvents and reagents                                                                     | S4  |
| 1.2. Chromatography                                                                            | S4  |
| 1.3. Spectroscopy                                                                              | S4  |
| 1.4. Single-crystal X-Ray structure determination                                              | S4  |
| 1.5. Starting material                                                                         | S5  |
| <b>2. Practical experimental</b>                                                               | S5  |
| 2.1. General procedure A for Michael addition of nucleophiles <b>7</b> to nitroolefin <b>8</b> | S5  |
| 2.1.1. Synthesis and characterization of <b>6b</b>                                             | S5  |
| 2.1.2. Synthesis and characterization of <b>6c</b>                                             | S6  |
| 2.1.3. Synthesis and characterization of <b>6d</b>                                             | S6  |
| 2.1.4. Synthesis and characterization of <b>6e</b>                                             | S6  |
| 2.2. General procedure B for nitro-Mannich/lactamization cascade                               | S7  |
| 2.2.1. Synthesis and characterization of <b>1a</b>                                             | S7  |
| 2.2.2. Enantioselective "one-pot" synthesis of (+)- <b>1a</b> and its characterization         | S8  |
| 2.2.3. Synthesis and characterization of <b>1b</b>                                             | S8  |
| 2.2.4. Synthesis and characterization of <b>1c</b>                                             | S9  |
| 2.2.5. Synthesis and characterization of <b>1d</b>                                             | S9  |
| 2.2.6. Synthesis and characterization of <b>1e</b>                                             | S10 |
| 2.2.7. Synthesis and characterization of <b>1f</b>                                             | S10 |
| 2.2.8. Synthesis and characterization of <b>1g</b>                                             | S11 |
| 2.2.9. Synthesis and characterization of <b>1h</b>                                             | S11 |
| 2.2.10. Synthesis and characterization of <b>1i</b>                                            | S12 |
| 2.2.11. Synthesis and characterization of <b>1j</b>                                            | S12 |
| 2.2.12. Synthesis and characterization of <b>2a</b>                                            | S13 |
| 2.2.13. Synthesis and characterization of <b>2a</b> and <b>2a''</b>                            | S13 |
| 2.2.14. Synthesis and characterization of <b>2m</b> and <b>2m'</b>                             | S14 |
| 2.3. General procedure C for the nitro-group removal                                           | S15 |
| 2.3.1. Synthesis and characterization of <b>10a</b>                                            | S15 |
| 2.3.2. Synthesis and characterization of <b>10b</b>                                            | S16 |
| 2.3.3. Synthesis and characterization of <b>10c</b>                                            | S17 |
| 2.3.4. Synthesis and characterization of <b>10d</b>                                            | S17 |
| 2.4. General procedure D for the chemoselective reduction of <b>10</b>                         | S18 |
| 2.4.1. Synthesis and characterization of <b>11a</b>                                            | S18 |
| 2.4.2. Synthesis and characterization of <b>11b</b>                                            | S19 |
| 2.4.3. Synthesis and characterization of <b>11c</b>                                            | S19 |
| 2.4.4. Synthesis and characterization of <b>12a</b>                                            | S20 |
| 2.4.5. Synthesis and characterization of <b>12b</b>                                            | S20 |
| <b>3. Elucidation of relative configuration</b>                                                | S21 |
| 3.1. nOes                                                                                      | S21 |
| 3.1.1. nOes, compound <b>1c</b>                                                                | S21 |
| 3.2. Single-crystal X-ray crystallography                                                      | S22 |
| 3.2.1. X-ray crystal structure of compound <b>6e</b>                                           | S22 |
| 3.2.2. X-ray crystal structure of compound <b>1g</b>                                           | S24 |

|                                                                     |     |
|---------------------------------------------------------------------|-----|
| 3.2.3. X-ray crystal structure of compound <b>2a</b>                | S26 |
| 3.2.4. X-ray crystal structure of compound <b>2a''</b>              | S28 |
| 3.2.5. X-ray crystal structure of compound <b>2m'</b>               | S30 |
| 3.2.6. X-ray crystal structure of compound <b>11c</b>               | S31 |
| <b>4. References</b>                                                | S33 |
| <b>5. <sup>1</sup>H and <sup>13</sup>C NMR spectra</b>              | S34 |
| 5.1. <sup>1</sup> H and <sup>13</sup> C NMR spectra of <b>6b</b>    | S34 |
| 5.2. <sup>1</sup> H and <sup>13</sup> C NMR spectra of <b>6c</b>    | S36 |
| 5.3. <sup>1</sup> H and <sup>13</sup> C NMR spectra of <b>6d</b>    | S38 |
| 5.4. <sup>1</sup> H and <sup>13</sup> C NMR spectra of <b>6e</b>    | S40 |
| 5.5. <sup>1</sup> H and <sup>13</sup> C NMR spectra of <b>1a</b>    | S42 |
| 5.6. <sup>1</sup> H and <sup>13</sup> C NMR spectra of <b>1b</b>    | S44 |
| 5.7. <sup>1</sup> H and <sup>13</sup> C NMR spectra of <b>1c</b>    | S46 |
| 5.8. <sup>1</sup> H and <sup>13</sup> C NMR spectra of <b>1d</b>    | S48 |
| 5.9. <sup>1</sup> H and <sup>13</sup> C NMR spectra of <b>1e</b>    | S50 |
| 5.10. <sup>1</sup> H and <sup>13</sup> C NMR spectra of <b>1f</b>   | S52 |
| 5.11. <sup>1</sup> H and <sup>13</sup> C NMR spectra of <b>1g</b>   | S54 |
| 5.12. <sup>1</sup> H and <sup>13</sup> C NMR spectra of <b>1h</b>   | S56 |
| 5.13. <sup>1</sup> H and <sup>13</sup> C NMR spectra of <b>1i</b>   | S58 |
| 5.14. <sup>1</sup> H and <sup>13</sup> C NMR spectra of <b>1j</b>   | S60 |
| 5.15. <sup>1</sup> H and <sup>13</sup> C NMR spectra of <b>2a</b>   | S62 |
| 5.16. <sup>1</sup> H and <sup>13</sup> C NMR spectra of <b>2a''</b> | S64 |
| 5.17. <sup>1</sup> H and <sup>13</sup> C NMR spectra of <b>2m</b>   | S66 |
| 5.18. <sup>1</sup> H and <sup>13</sup> C NMR spectra of <b>2m'</b>  | S68 |
| 5.19. <sup>1</sup> H and <sup>13</sup> C NMR spectra of <b>10a</b>  | S70 |
| 5.20. <sup>1</sup> H and <sup>13</sup> C NMR spectra of <b>10b</b>  | S72 |
| 5.21. <sup>1</sup> H and <sup>13</sup> C NMR spectra of <b>10c</b>  | S74 |
| 5.22. <sup>1</sup> H and <sup>13</sup> C NMR spectra of <b>10d</b>  | S76 |
| 5.23. <sup>1</sup> H and <sup>13</sup> C NMR spectra of <b>11a</b>  | S78 |
| 5.24. <sup>1</sup> H and <sup>13</sup> C NMR spectra of <b>11b</b>  | S80 |
| 5.25. <sup>1</sup> H and <sup>13</sup> C NMR spectra of <b>11c</b>  | S82 |
| 5.26. <sup>1</sup> H and <sup>13</sup> C NMR spectra of <b>12a</b>  | S84 |
| 5.27. <sup>1</sup> H and <sup>13</sup> C NMR spectra of <b>12b</b>  | S86 |
| <b>6. HPLC trace</b>                                                | S88 |
| 6.1. HPLC trace of (±)- <b>1a</b>                                   | S88 |
| 6.2. HPLC trace of (+)- <b>1a</b>                                   | S89 |

## 1. General experimental

All reactions were performed under an atmosphere of dry nitrogen unless otherwise stated. All glass apparatus were oven dried and cooled under vacuum before use.

### 1.1. Solvents and reagents

Bulk solutions were evaporated under reduced pressure by using a Büchi rotary evaporator. Tetrahydrofuran and diethyl ether were distilled from sodium benzophenone ketyl radical. Dichloromethane and toluene were distilled from calcium hydride prior to use. Petroleum ether refers to the distilled light petroleum of fraction (40–65 °C). Reagents used were obtained from commercial suppliers and used without purification

### 1.2. Chromatography

Column chromatography was carried out by using Merck Kieselgel 60 silica gel (230–400 mesh). All reactions were followed by thin-layer chromatography (TLC) where practical, with Merck Kieselgel 60 F<sub>254</sub> (230–400 mesh) fluorescent treated silica, which were visualised under UV light (250 nm) or by staining with aqueous acidic ammonium molybdate or aqueous basic potassium permanganate solutions, as appropriate.

### 1.3. Spectroscopy

All <sup>1</sup>H and <sup>13</sup>C NMR spectra were recorded on a Bruker 500, 400 MHz or Varian 300 MHz spectrometer and are quoted in ppm for measurements against a TMS internal standard. Unless otherwise stated all experiments were carried out in *d*-chloroform as solvent. Chemical shifts ( $\delta$ ) are given in parts per million (ppm), and coupling constants (*J*) are given in hertz (Hz). The <sup>1</sup>H NMR spectra are reported as follows:  $\sigma$ /ppm (multiplicity (s = singlet, d = doublet, t = triplet, q = quartet, sxt = sextet, m = multiplet, bs = broad singlet, "d" = apparent doublet, "dd" = apparent doublet of doublet, "dt" = apparent doublet of triplet), number of protons, coupling constants *J*/Hz (where appropriate) and assignment). DEPT 135 and two-dimensional (COSY, HMQC, HMBC) NMR spectroscopy were used where appropriate to assist the assignment of signals in the <sup>1</sup>H and <sup>13</sup>C NMR spectra. n.O.e experiments were used to determine the relative configuration. Low-resolution mass spectrometry (EI, CI) was recorded on a Fissions VG Trio 2000 quadrupole mass spectrometer. High-resolution mass spectra (accurate mass) were recorded on a Thermo Finnigan Mat 95XP mass spectrometer. Infrared spectra were recorded on an ATI Mattson: Genesis Series FTIR spectrometer from a thin film deposited onto a sodium chloride plate. Only selected maximum absorbances ( $\nu_{\max}$ ) are reported. Optical rotations were recorded by using an Optical Activity AA-1000 polarimeter;  $[\alpha]_D$  values are reported in 10<sup>-1</sup> deg cm<sup>2</sup> g<sup>-1</sup>; concentration (*c*) is given in g/100 mL at 589 nm.

### 1.4. Single-crystal X-ray structure determination

Diffraction data were collected at low temperature [1] on a Bruker SMART CCD diffractometer (**1g**, **2a** and **2a''**) or a Nonius Kappa CCD diffractometer (**6e** and **11c**); raw frames were integrated with SAINT [Bruker SMART, SADABS and SAINT, Bruker AXS Inc., Madison, Wisconsin, USA.] or DENZO-SMN [2] as appropriate. Inter-frame scaling and absorption corrections were carried out with SADABS [3] (**1g**, **2a** and **2a''**) or SCALEPACK (**6e** and **11c**). The structures were solved by direct methods with SIR2004 [4] (**1g**), SHELXS [3] (**2a** and **2a''**) or SIR92 (**6e** and **11c**). Compounds **1g**, **2a** and **2a''** were refined with SHELXL [3]; all nonhydrogen atoms were refined with anisotropic displacement parameters and hydrogen atoms were positioned geometrically. Compounds **6e** and **11c** were refined with the CRYSTALS suite [5].



### 2.1.2. Synthesis and characterization of 6c

(±)-Dimethyl methyl(2-nitro-1-phenylethyl)propanedioate (**6c**)

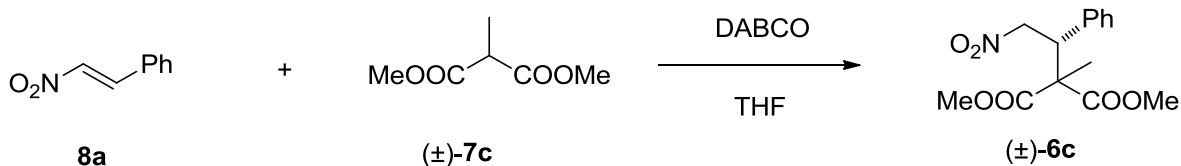

According to general procedure A (for 6.7 mmol, 1.000 g of **8a** used 20.1 mmol, 2.937 g, 2.675 mL of methyl dimethylmalonate **7c**; 1.3 mmol, 0.150 g of DABCO and 6.7 mL of THF; 6 days). (±)-**6c** (1.381 g, 70%) was obtained after flash column chromatography (Et<sub>2</sub>O/PE 1:2) as a colourless solid. Mp 106–107 °C. All spectral data are in agreement with those published in the literature [13,14].

### 2.1.3. Synthesis and characterization of 6d

(±)-Dimethyl (2-nitro-1-phenylethyl)propanedioate (**6d**)

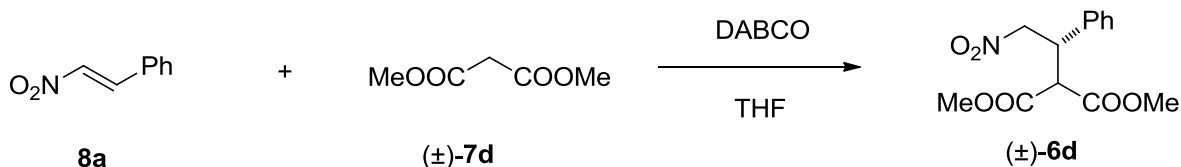

According to general procedure A (for 6.7 mmol, 1.000 g of **8a** used 20.1 mmol, 2.655 g, 2.297 mL of **7d**; 1.3 mmol, 0.150 g of DABCO and 6.7 mL of THF; 2 days). **6d** (1.623 g, 86%) was obtained after flash column chromatography (PE/Et<sub>2</sub>O 1:1) as a colourless solid.

Mp 60–61 °C (lit. [15]: mp 63 °C); all spectral data are in agreement with those published in the literature [13].

### 2.1.4. Synthesis and characterization of 6e

(±)-Methyl (3*S*)-3-[(1*R*)-1-(furan-3-yl)-2-nitroethyl]-2-oxotetrahydrofuran-3-carboxylate (**6e**)

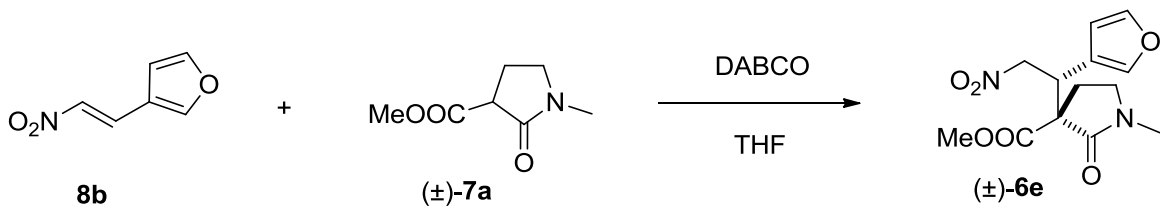

According to the general procedure A (for 32.3 mmol, 4.500 g of **8b** used 42.1 mmol, 6.609 g of **7a**; 9.7 mmol, 1.088 g of DABCO and 45 mL of THF; 72 h; the reaction was performed with exclusion of light). **6e** (5.253 g, 55%, dr 62:38) was obtained after column chromatography (Et<sub>2</sub>O → Et<sub>2</sub>O/AcOEt 80:20) as an off-white solid. Recrystallisation of the mixture of diastereomers (EtOH) afforded the single diastereomer (±)-**6e** as a colourless solid.

Mp 116–117 °C; IR (film) 2956, 2889 (C–H), 1735 (C=O), 1688 (C=O), 1553, 1380 (NO<sub>2</sub>); <sup>1</sup>H NMR (500 MHz, CDCl<sub>3</sub>) δ 2.08–2.14 (m, 1H, CH<sub>A</sub>H<sub>B</sub>CH<sub>2</sub>N), 2.32 (ddd, 1H, *J* = 13.3, 8.8, 4.4 Hz, CH<sub>A</sub>H<sub>B</sub>CH<sub>2</sub>N), 2.81–2.85 (m, 4H, CH<sub>2</sub>CH<sub>A</sub>H<sub>B</sub>N, CH<sub>3</sub>N), 3.31 ("dt", 1H, *J* = 9.0, 6.0 Hz, CH<sub>2</sub>CH<sub>A</sub>H<sub>B</sub>N), 3.81 (s, 3H, CH<sub>3</sub>O), 4.19 (dd, 1H, *J* = 11.0, 3.2 Hz, CHCH<sub>A</sub>H<sub>B</sub>NO<sub>2</sub>), 4.89 (dd, 1H, *J* = 13.2, 3.2 Hz, CHCH<sub>A</sub>H<sub>B</sub>NO<sub>2</sub>), 5.10 (dd, 1H, *J* = 13.2, 11.0 Hz, CHCH<sub>A</sub>H<sub>B</sub>NO<sub>2</sub>), 6.29 (s, 1H, *H*-Ar), 7.38–7.39 (m, 2H,

H-Ar);  $^{13}\text{C}$  NMR (125 MHz,  $\text{CDCl}_3$ )  $\delta$  28.3 ( $\text{CH}_2\text{CH}_2\text{N}$ ), 30.1 ( $\text{CH}_3\text{N}$ ), 38.5 ( $\text{CHAr}$ ), 46.8 ( $\text{CH}_2\text{CH}_2\text{N}$ ), 53.2 ( $\text{CH}_3\text{O}$ ), 57.3 ( $\text{C}_{\text{quat}}$ ), 77.1 ( $\text{CH}_2\text{NO}_2$ ), 109.3, 119.5, 141.8, 143.8 ( $\text{C-Ar}$ ), 170.4, 171.6 ( $\text{C=O}$ ); HRMS-ES+ ( $m/z$ ):  $[\text{M} + \text{Na}]^+$  calculated for  $\text{C}_{13}\text{H}_{16}\text{N}_2\text{NaO}_6$ , 319.0925; found, 319.0918.

## 2.2. General procedures B for nitro-Mannich / lactamisation cascade

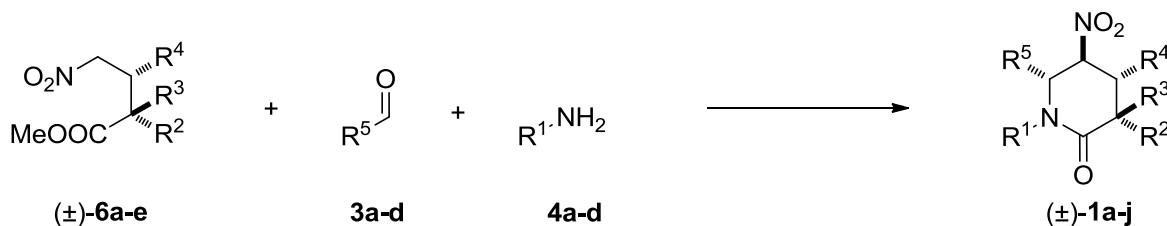

Michael adduct **6** (0.49 mmol) was placed in a suitable solvent (MeOH or water, 3.5 mL,  $c = 0.14$  M) at rt. To the mixture was added amine **4** (2 equiv, 0.98 mmol) and aldehyde **3** (2 equiv, 0.98 mmol), and the mixture was heated under reflux in MeOH (at 70 °C in water) until the starting material had been consumed by TLC analysis. The mixture was then concentrated in vacuo and subjected to flash column chromatography.

### 2.2.1. Synthesis and characterization of **1a**

( $\pm$ )-(5*R*,9*S*,10*R*)-2-Methyl-9-nitro-10-phenyl-7-(prop-2-en-1-yl)-2,7-diazaspiro[4.5]decane-1,6-dione (**1a**)

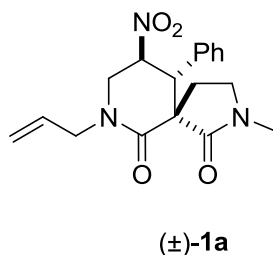

According to the general procedure B (for 0.49 mmol, 150 mg of **6a** used 0.98 mmol, 74  $\mu\text{L}$  of allylamine (**4a**); 0.98 mmol, 74  $\mu\text{L}$  of formaldehyde (**3a**, 37% solution in water) and 3.5 mL of MeOH; under reflux; 4 h). **1a** (153 mg, 90%) was obtained as a colourless solid after flash column chromatography ( $\text{Et}_2\text{O}$ ).

Mp 145–146 °C; IR (film) 2923 (C-H), 1680 (C=O), 1650 (C=O), 1551, 1351 ( $\text{NO}_2$ );  $^1\text{H}$  NMR (500 MHz,  $\text{CDCl}_3$ )  $\delta$  1.80–1.85 (m, 1H,  $\text{CH}_\text{A}\text{H}_\text{B}\text{CH}_2\text{N}$ ), 2.07–2.12 (m, 1H,  $\text{CH}_2\text{CH}_\text{A}\text{H}_\text{B}\text{N}$ ), 2.58 (s, 3H,  $\text{CH}_3\text{N}$ ), 2.91–2.97 (m, 1H,  $\text{CH}_\text{A}\text{H}_\text{B}\text{CH}_2\text{N}$ ), 3.09–3.14 (m, 1H,  $\text{CH}_2\text{CH}_\text{A}\text{H}_\text{B}\text{N}$ ), 3.58 (d, 1H,  $J = 11.7$  Hz,  $\text{PhCHCH}$ ), 3.72 (dd, 1H,  $J = 12.0, 8.8$  Hz,  $\text{CH}_\text{A}\text{H}_\text{B}\text{CHNO}_2$ ), 3.96 (dd, 1H,  $J = 15.1, 5.7$  Hz,  $\text{CH}_\text{A}\text{CH}_\text{B}\text{CH}=\text{CH}_2$ ), 4.07 (dd, 1H,  $J = 12.0, 6.6$  Hz,  $\text{CH}_\text{A}\text{H}_\text{B}\text{CHNO}_2$ ), 4.12 (dd, 1H,  $J = 15.1, 5.7$  Hz,  $\text{CH}_\text{A}\text{CH}_\text{B}\text{CH}=\text{CH}_2$ ), 5.21–5.28 (m, 2H,  $\text{CH}=\text{CH}_2$ ), 5.69–5.77 (m, 1H,  $\text{CH}=\text{CH}_2$ ), 6.27 (ddd, 1H,  $J = 11.7, 8.8, 6.6$  Hz,  $\text{CHNO}_2$ ), 7.20–7.26 (m, 5H, H-Ar);  $^{13}\text{C}$  NMR (125 MHz,  $\text{CDCl}_3$ )  $\delta$  27.0 ( $\text{CH}_2\text{CH}_2\text{N}$ ), 29.8 ( $\text{CH}_3\text{N}$ ), 47.0 ( $\text{CH}_2\text{CH}_2\text{N}$ ), 48.9 ( $\text{CH}_2\text{CHNO}_2$ ), 50.0 ( $\text{CH}_2\text{CH}=\text{CH}_2$ ), 51.0 ( $\text{CHPh}$ ), 56.2 ( $\text{C}_{\text{quat}}$ ), 81.5 ( $\text{CHNO}_2$ ), 118.4, 128.6, 128.7, 131.0, 133.9 ( $\text{C-Ar}$ ,  $\text{CH}_2\text{CH}=\text{CH}_2$ ), 167.8, 171.1 ( $\text{C=O}$ ); HRMS-ES+ ( $m/z$ ):  $[\text{M} + \text{Na}]^+$  calculated for  $\text{C}_{18}\text{H}_{21}\text{N}_3\text{NaO}_4$ , 366.1424; found, 366.1436; Anal. calcd for  $\text{C}_{18}\text{H}_{21}\text{N}_3\text{O}_4$ : C, 62.96; H, 6.16; N, 12.24; found: C, 62.87; H, 6.22; N, 12.17%.

## 2.2.2. Enantioselective "one-pot" synthesis of (+)-1a and its characterization

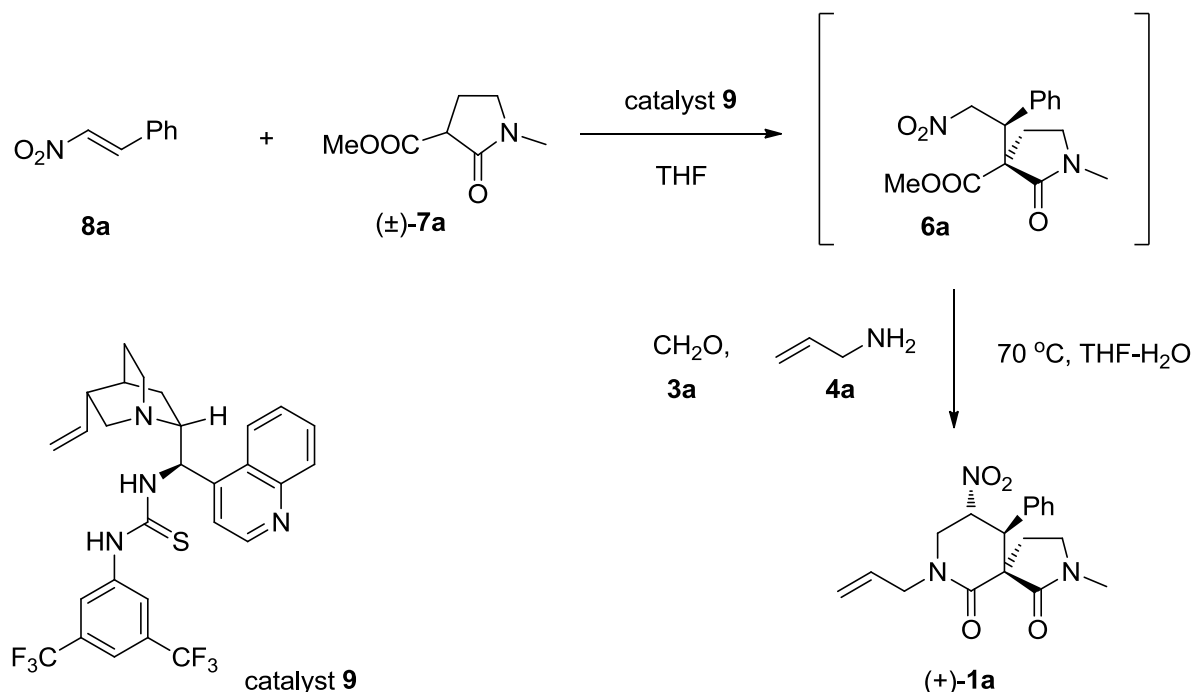

A solution of nitrostyrene **8a** (0.67 mmol, 0.100 g), ester **7a** (1.3 equiv, 0.87 mmol, 0.137 g) and catalyst **9** (0.2 equiv, 0.13 mmol, 0.076 g) in THF (1 mL) was stirred at −20 °C. After starting material had been consumed (TLC monitoring, 14 d) water (4 mL), formaldehyde (**3a**, 2 equiv, 1.34 mmol, 101 µL of 37% solution in water) and allylamine (**4a**, 2 equiv, 1.34 mmol, 101 µL) were added and the mixture was stirred at 70 °C. After 1 h the mixture was cooled to rt and concentrated in vacuo. The crude product was purified by flash column chromatography (Et<sub>2</sub>O) to obtain **(+)-1a** as a colourless solid (0.153 g, 67%, 92% ee). Recrystallization (MeOH/Et<sub>2</sub>O) afforded **(+)-1a** in 98% ee.

For **(+)-1a**, 98% ee the spectroscopic data was identical to that of the racemate. Mp 128–129 °C,  $[\alpha]_D^{25} = +24.4$  (*c* 0.6, CHCl<sub>3</sub>).

## 2.2.3. Synthesis and characterization of 1b

(±)-(5*S*,9*S*,10*R*)-9-Nitro-10-phenyl-7-(prop-2-en-1-yl)-2-oxa-7-azaspiro[4.5]decane-1,6-dione (**1b**)

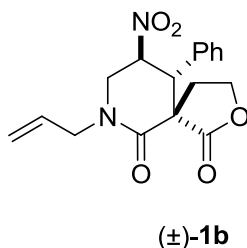

According to the general procedure B (for 0.34 mmol, 0.100 g of **6b** used 0.61 mmol, 46 µL, of allylamine (**4a**); 0.61 mmol, 46 µL, of formaldehyde (**3a**, 37% solution in water) and 2.5 ml of MeOH; under reflux; 8 h). **1b** (0.058 g, 52%) was obtained after column chromatography (Et<sub>2</sub>O) as a colourless solid. Mp 135–137 °C; IR (film) 2924 (C-H), 1756 (C=O), 1651 (C=O), 1556, 1351 (NO<sub>2</sub>); <sup>1</sup>H NMR (500 MHz, CDCl<sub>3</sub>) δ 2.14–2.19 (m, 1H, CH<sub>A</sub>H<sub>B</sub>CH<sub>2</sub>O), 3.12–3.18 (m, 1H, CH<sub>A</sub>H<sub>B</sub>CH<sub>2</sub>O), 3.42–3.47 (m, 1H, CH<sub>2</sub>CH<sub>A</sub>H<sub>B</sub>O), 3.74 (d, 1H, *J* = 11.7 Hz, CHPh), 3.82 (dd, 1H, *J* = 12.6, 8.2 Hz, CH<sub>A</sub>H<sub>B</sub>CHNO<sub>2</sub>), 4.02 (dd, 1H, *J* = 15.1, 6.0 Hz, NCH<sub>A</sub>H<sub>B</sub>CH=CH<sub>2</sub>), 4.17–4.22 (m, 2H, NCH<sub>A</sub>H<sub>B</sub>CH=CH<sub>2</sub>, CH<sub>A</sub>H<sub>B</sub>CHNO<sub>2</sub>), 4.31–4.36 (m, 1H, CH<sub>2</sub>CH<sub>A</sub>H<sub>B</sub>O), 5.29–5.32 (m, 2H, CH<sub>2</sub>=CH), 5.75–5.82 (m, 1H, CH=CH<sub>2</sub>), 6.18 (ddd, 1H, *J* = 11.7, 7.9, 7.1 Hz, CHNO<sub>2</sub>), 7.29–7.42 (m, 5H, H-Ar); <sup>13</sup>C NMR (125 MHz,



CDCl<sub>3</sub>)  $\delta$  30.7 (CH<sub>2</sub>CH<sub>2</sub>O), 48.8 (CH<sub>2</sub>CHNO<sub>2</sub>), 50.0 (CH<sub>2</sub>CH=CH<sub>2</sub>), 50.3 (CHPh), 55.3 (C<sub>quat</sub>), 67.6 (CH<sub>2</sub>CH<sub>2</sub>O), 81.8 (CHNO<sub>2</sub>), 119.1, 128.6, 129.4, 129.5, 130.8, 133.4 (CH<sub>2</sub>CH=CH<sub>2</sub>, C-Ar), 165.7, 174.8 (C=O); HRMS–ES<sup>+</sup> ( $m/z$ ): [M + Na]<sup>+</sup> calcd for C<sub>17</sub>H<sub>18</sub>N<sub>2</sub>NaO<sub>5</sub>, 353.1108; found, 353.1105.

#### 2.2.4. Synthesis and characterization of **1c**

(±)-Methyl (3*S*,4*R*,5*S*)-3-methyl-5-nitro-2-oxo-4-phenyl-1-(prop-2-en-1-yl)piperidine-3-carboxylate (**1c**)

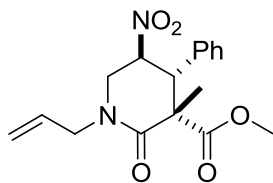

(±)-**1c**

According to the general procedure B (for 1.70 mmol, 0.500 g of **6c** used 2.20 mmol, 165  $\mu$ L, of allylamine (**4a**); 2.20 mmol, 165  $\mu$ L, of formaldehyde (**3a**, 37% solution in water) and 12.0 mL of MeOH; under reflux; 4 h). **1c** (0.297 g, 53%) was obtained after column chromatography (Et<sub>2</sub>O) as a colourless solid. Mp 86–88 °C; IR (film) 2950 (C–H), 1750 (C=O), 1649 (C=O), 1556, 1350 (NO<sub>2</sub>); <sup>1</sup>H NMR (500 MHz, CDCl<sub>3</sub>)  $\delta$  1.43 (s, 3H, C<sub>quat</sub>CH<sub>3</sub>), 3.51–3.53 (m, 4H, CH<sub>3</sub>O, CHPh), 3.78 (dd, 1H, *J* = 12.0, 9.8 Hz, CH<sub>A</sub>H<sub>B</sub>CHNO<sub>2</sub>), 3.86–3.91 (m, 2H, CH<sub>A</sub>H<sub>B</sub>CHNO<sub>2</sub>, CH<sub>A</sub>H<sub>B</sub>CH=CH<sub>2</sub>), 4.16 (dd, 1H, *J* = 15.3, 5.5 Hz, CH<sub>A</sub>H<sub>B</sub>CH=CH<sub>2</sub>), 5.21–5.24 (m, 2H, CH=CH<sub>2</sub>), 5.68–5.75 (m, 1H, CH=CH<sub>2</sub>), 5.90 (ddd, 1H, *J* = 12.3, 9.8, 6.0 Hz, CHNO<sub>2</sub>), 7.06–7.08 (m, 2H, H-Ar), 7.20–7.26 (m, 3H, H-Ar); <sup>13</sup>C NMR (125 MHz, CDCl<sub>3</sub>)  $\delta$  21.1 (CH<sub>3</sub>), 49.0 (CH<sub>2</sub>CHNO<sub>2</sub>), 49.9 (CH<sub>2</sub>CH=CH<sub>2</sub>), 52.4 (CH<sub>3</sub>O), 52.7 (CHPh), 55.2 (C<sub>quat</sub>), 81.4 (CHNO<sub>2</sub>), 118.6, 128.3, 128.8, 131.1, 133.5 (CH<sub>2</sub>=CH, C-Ar), 167.3, 170.7 (C=O); HRMS–ES<sup>+</sup> ( $m/z$ ): [M + H]<sup>+</sup> calculated for C<sub>17</sub>H<sub>21</sub>N<sub>2</sub>O<sub>5</sub>, 333.1445; found, 333.1454.

#### 2.2.5. Synthesis and characterization of **1d**

(±)-Methyl (3*R*,4*S*,5*S*,6*R*)-6-methyl-5-nitro-2-oxo-4-phenyl-1-(prop-2-en-1-yl)piperidine-3-carboxylate (**1d**)

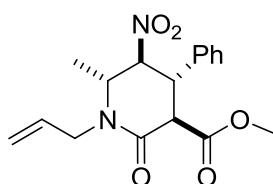

(±)-**1d**

According to the general procedure B (for 0.49 mmol, 0.138 g of **6d** used 2.20 mmol, 0.126 g, 165  $\mu$ L of allylamine (**4a**); 2.20 mmol, 0.097 g, 123  $\mu$ L, of acetaldehyde (**3b**) and 3.8 mL of MeOH; under reflux; 4 h). **1d** (0.099 g, 61%) was obtained after column chromatography (Et<sub>2</sub>O) as a colourless solid. Mp 115–116 °C; IR (film) 2953 (C–H), 1746 (C=O), 1648 (C=O), 1557, 1350 (NO<sub>2</sub>); <sup>1</sup>H NMR (500 MHz, CDCl<sub>3</sub>)  $\delta$  1.38 (d, 3H, *J* = 6.3 Hz, CH<sub>3</sub>CH), 3.51 (s, 3H, CH<sub>3</sub>O), 3.65 (d, 1H, *J* = 12.9 Hz, CHCOOCH<sub>3</sub>), 3.75 (dd, 1H, *J* = 15.1, 7.3 Hz, CH<sub>A</sub>CH<sub>B</sub>CH=CH<sub>2</sub>), 4.00 (dd, 1H, *J* = 12.9, 11.0 Hz, CHPh), 4.04–4.10 (m, 1H, CH<sub>3</sub>CH), 4.39–4.44 (m, 1H, CH<sub>A</sub>CH<sub>B</sub>CH=CH<sub>2</sub>), 4.73 (dd, 1H, *J* = 11.0, 7.6 Hz, CHNO<sub>2</sub>), 5.20–5.24 (m, 2H, CH<sub>2</sub>CH=CH<sub>2</sub>), 5.71–5.79 (m, 1H, CH<sub>2</sub>CH=CH<sub>2</sub>), 7.11–7.14 (m, 2H, H-Ar), 7.22–7.29 (m, 3H, H-Ar); <sup>13</sup>C NMR (125 MHz, CDCl<sub>3</sub>)  $\delta$  19.6 (CH<sub>3</sub>CH), 45.1 (CH), 46.7 (CH), 52.7 (CH<sub>2</sub>CH=CH<sub>2</sub>), 53.4 (OCH<sub>3</sub>), 54.7 (CH), 92.6 (CHNO<sub>2</sub>), 119.1, 127.4, 128.8, 129.3, 132.1, 135.3

(C-Ar, CH<sub>2</sub>CH=CH<sub>2</sub>), 167.9, 171.0 (C=O); HRMS-ES<sup>+</sup> (*m/z*): [M + Na]<sup>+</sup> calculated for C<sub>17</sub>H<sub>20</sub>N<sub>2</sub>NaO<sub>5</sub>, 355.1264; found, 355.1269.

### 2.2.6. Synthesis and characterization of **1e**

(±)-(5*R*,8*R*,9*S*,10*R*)-2,8-Dimethyl-9-nitro-10-phenyl-7-(prop-2-en-1-yl)-2,7-diazaspiro[4.5]decane-1,6-dione (**1e**)

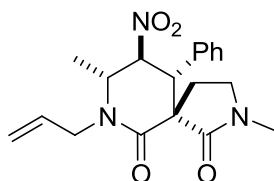

(±)-**1e**

According to the general procedure B (for 0.49 mmol, 0.150 g of **6a** used 0.98 mmol, 74 μL, of allylamine (**4a**); 0.98 mmol, 55 μL, of acetaldehyde (**3b**) and 3.8 mL of MeOH; under reflux; 24 h). **1e** (0.117 g, 67%) was obtained after column chromatography (Et<sub>2</sub>O) as a colourless solid.

Mp 118–120 °C; IR (film) 2926 (C-H), 1685 (C=O), 1647 (C=O), 1553, 1338 (NO<sub>2</sub>); <sup>1</sup>H NMR (500 MHz, CDCl<sub>3</sub>) δ 1.59 (d, 3H, *J* = 6.0 Hz, CH<sub>3</sub>CH), 1.82–1.87 (m, 1H, CH<sub>A</sub>H<sub>B</sub>CH<sub>2</sub>N), 2.11–2.16 (m, 1H, CH<sub>2</sub>CH<sub>A</sub>H<sub>B</sub>N), 2.70 (s, 3H, CH<sub>3</sub>N), 3.01–3.07 (m, 1H, CH<sub>A</sub>H<sub>B</sub>CH<sub>2</sub>N), 3.17–3.21 (m, 1H, CH<sub>2</sub>H<sub>A</sub>H<sub>B</sub>N), 3.61 (d, 1H, *J* = 12.6 Hz, CHPh), 3.96 (dd, 1H, *J* = 15.8 Hz, *J* = 6.6 Hz, CH<sub>A</sub>CH<sub>B</sub>CH=CH<sub>2</sub>), 4.02–4.07 (m, 1H, CHCH<sub>3</sub>), 4.39 (dd, 1H, *J* = 15.8 Hz, *J* = 4.1 Hz, CH<sub>A</sub>CH<sub>B</sub>CH=CH<sub>2</sub>), 5.25–5.31 (m, 2H, CH=CH<sub>2</sub>), 5.80–5.88 (m, 1H, CH=CH<sub>2</sub>), 6.16 (dd, 1H, *J* = 12.6, 8.5 Hz, CHNO<sub>2</sub>), 7.21–7.39 (m, 5H, H-Ar); <sup>13</sup>C NMR (125 MHz, CDCl<sub>3</sub>) δ 19.5 (CH<sub>3</sub>CH), 27.1 (CH<sub>2</sub>CH<sub>2</sub>N), 30.0 (CH<sub>3</sub>N), 47.2 (CH<sub>2</sub>CH<sub>2</sub>N), 47.4 (CH<sub>2</sub>CH=CH<sub>2</sub>), 49.8 (CHPh), 55.5 (CH<sub>3</sub>CH), 55.9 (C<sub>quat</sub>), 89.2 (CHNO<sub>2</sub>), 118.0, 128.8, 128.9, 132.3, 133.8 (C-Ar, CH<sub>2</sub>CH=CH<sub>2</sub>), 167.9, 171.0 (C=O); HRMS-ES<sup>+</sup> (*m/z*): [M + Na]<sup>+</sup> calculated for C<sub>19</sub>H<sub>23</sub>N<sub>3</sub>NaO<sub>4</sub>, 380.1581; found, 380.1582.

### 2.2.7. Synthesis and characterization of **1f**

(±)-(5*R*,8*R*,9*S*,10*R*)-7-Allyl-8-(4-methoxyphenyl)-2-methyl-9-nitro-10-phenyl-2,7-diazaspiro[4.5]decane-1,6-dione (**1f**)

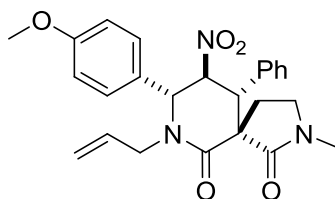

(±)-**1f**

According to the general procedure B (for 0.98 mmol, 0.300 g of **6a** used 1.96 mmol, 147 μL of allylamine (**4a**); 1.96 mmol, 0.267 g of anisaldehyde (**3c**) and 7.2 mL of MeOH; under reflux; 20 d). **1f** (0.221 g, 50%) was obtained after filtration of the solid precipitation from suspension and washing of the organics with MeOH (3 mL), as a colourless solid.

Mp 180–181 °C; IR (film) 2932 (C-H), 1677 (C=O), 1648 (C=O), 1554 (NO<sub>2</sub>); <sup>1</sup>H NMR (500 MHz, CDCl<sub>3</sub>) δ 1.91–1.96 (m, 1H, CH<sub>A</sub>H<sub>B</sub>CH<sub>2</sub>N), 2.08–2.13 (m, 1H, CH<sub>2</sub>CH<sub>A</sub>H<sub>B</sub>N), 2.72 (s, 3H, CH<sub>3</sub>N), 3.10–3.22 (m, 3H, CH<sub>A</sub>H<sub>B</sub>CH<sub>2</sub>N, CH<sub>2</sub>CH<sub>A</sub>H<sub>B</sub>N, CH<sub>A</sub>H<sub>B</sub>CH=CH<sub>2</sub>), 3.70 (d, 1H, *J* = 12.3 Hz, CHPh), 3.82 (s, 3H, CH<sub>3</sub>O), 4.56 (dd, 1H, *J* = 15.1, 3.8 Hz, CH<sub>A</sub>H<sub>B</sub>CH=CH<sub>2</sub>), 4.93 (d, 1H, *J* = 9.5 Hz,

NCHCHNO<sub>2</sub>), 5.00 ("d", 1H, *J* = 17.0 Hz, CH<sub>2</sub>CH=CH<sub>A</sub>H<sub>B</sub>), 5.19 ("d", 1H, *J* = 10.1 Hz, CH<sub>2</sub>CH=CH<sub>A</sub>H<sub>B</sub>), 5.68–5.76 (m, 1H, CH<sub>2</sub>CH=CH<sub>2</sub>), 6.50 (dd, 1H, *J* = 12.3, 9.5 Hz, CHNO<sub>2</sub>), 6.90–7.41 (m, 9H, H-Ar); <sup>13</sup>C NMR (125 MHz, CDCl<sub>3</sub>) δ 27.6 (CH<sub>2</sub>CH<sub>2</sub>N), 30.0 (CH<sub>3</sub>N), 47.1 (CH<sub>2</sub>CH<sub>2</sub>N), 47.2 (CH<sub>2</sub>CH=CH<sub>2</sub>), 50.7 (CHPh), 55.2 (CH<sub>3</sub>O), 56.3 (C<sub>quat</sub>), 63.7 (NCHCHNO<sub>2</sub>), 89.4 (CHNO<sub>2</sub>), 114.7, 118.6, 126.0, 128.1, 128.7, 128.9, 129.4, 131.6, 133.4, 160.2 (C-Ar, CH<sub>2</sub>CH=CH<sub>2</sub>), 168.0, 171.2 (C=O); HRMS–ES<sup>+</sup> (*m/z*): [M + H]<sup>+</sup> calculated C<sub>25</sub>H<sub>28</sub>N<sub>3</sub>O<sub>5</sub>, 450.2023; found, 450.2030; Anal. calcd for C<sub>25</sub>H<sub>27</sub>N<sub>3</sub>O<sub>5</sub>: C, 66.80; H, 6.05; N, 9.35; found: C, 66.71; H, 6.08; N, 9.33%.

## 2.2.8. Synthesis and characterization of 1g

(±)-(5*R*,8*S*,9*S*,10*R*)-2-Methyl-9-nitro-1,6-dioxo-10-phenyl-7-(prop-2-en-1-yl)-2,7-diazaspiro[4.5]decane-8-carboxylic acid (**1g**)

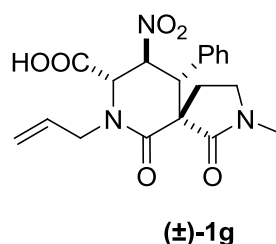

Michael adduct **6a** (0.65 mmol, 0.200 g) was suspended in water (4.8 mL), glyoxylic acid (**3d**, 1.3 mmol, 0.120 g) and allylamine (**4a**, 2.6 mmol, 195 μL) were added and the mixture was stirred at 70 °C. After 3 h, the solution was cooled to rt and the pH was adjusted to ~2. The resulting suspension was stirred for 0.5 h at rt, and the insoluble precipitation was filtered off and washed with water, Et<sub>2</sub>O (2 × 10 mL) to yield **1g** (0.187 g, 74%) as a colourless solid.

Mp 203–205 °C (CH<sub>3</sub>CN); IR (film) 2923 (C-H), 1678 (C=O), 1665 (C=O), 1649 (C=O), 1557, 1357 (NO<sub>2</sub>); <sup>1</sup>H NMR (500 MHz, *d*<sub>6</sub>-DMSO) δ 1.67–1.73 (m, 1H, CH<sub>A</sub>H<sub>B</sub>CH<sub>2</sub>N), 2.06–2.11 (m, 1H, CH<sub>A</sub>H<sub>B</sub>CH<sub>2</sub>N), 2.60 (s, 3H, CH<sub>3</sub>N), 2.74–2.81 (m, 1H, CH<sub>2</sub>CH<sub>A</sub>H<sub>B</sub>N), 3.15–3.19 (m, 1H, CH<sub>2</sub>H<sub>A</sub>H<sub>B</sub>N), 3.58 (dd, 1H, *J* = 15.6, 7.1 Hz, CH<sub>A</sub>CH<sub>B</sub>CH=CH<sub>2</sub>), 3.85 (d, 1H, *J* = 12.3 Hz, CHPh), 4.69 (dd, 1H, *J* = 15.6, 4.6 Hz, CH<sub>A</sub>CH<sub>B</sub>CH=CH<sub>2</sub>), 4.79 (d, 1H, *J* = 5.7 Hz, NCHCOOH), 5.23–5.33 (m, 2H, CH<sub>2</sub>CH=CH<sub>2</sub>), 5.80–5.88 (m, 1H, CH=CH<sub>2</sub>), 6.23 (dd, 1H, *J* = 12.3, 5.7 Hz, CHNO<sub>2</sub>), 7.25–7.30 (m, 2H, H-Ar), 7.36–7.41 (m, 3H, H-Ar), 13.73 (bs, 1H, COOH); <sup>13</sup>C NMR (125 MHz, *d*<sub>6</sub>-DMSO) δ 26.3 (CH<sub>2</sub>CH<sub>2</sub>N), 29.6 (CH<sub>3</sub>N), 46.5 (CH<sub>2</sub>N), 48.9 (CH<sub>2</sub>N), 49.5 (CHPh), 55.3 (C<sub>quat</sub>), 60.4 (CHCOOH), 87.0 (CHNO<sub>2</sub>), 118.1, 128.8, 128.9, 132.4, 134.3 (C-Ar, CH<sub>2</sub>CH=CH<sub>2</sub>), 168.0, 169.4, 170.0 (C=O); HRMS–ES<sup>+</sup> (*m/z*): [M + H]<sup>+</sup> calculated for C<sub>19</sub>H<sub>22</sub>N<sub>3</sub>O<sub>6</sub>, 388.1503; found, 388.1509; Anal. calcd for C<sub>19</sub>H<sub>21</sub>N<sub>3</sub>O<sub>6</sub>: C, 58.91; H, 5.46; N, 10.85; found: C, 58.95; H, 5.52; N, 10.85%.

## 2.2.9. Synthesis and characterization of 1h

(±)-(5*R*,9*S*,10*R*)-7-Benzyl-2-methyl-9-nitro-10-phenyl-2,7-diazaspiro[4.5]decane-1,6-dione (**1h**)

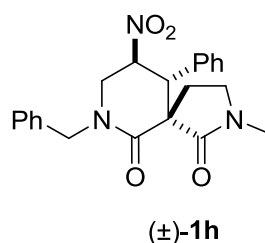

According to the general procedure B (for 0.49 mmol, 0.150 g of **6a** used 0.98 mmol, 107 μL of benzylamine (**4b**); 0.98 mmol, 74 μL of formaldehyde (**3a**, 37% solution in water); 0.05 mmol, 0.014 g

of sodium dodecylsulfate; 3.5 mL of MeOH and 0.5 mL of water; at 70 °C; 24 h). **1h** (0.156 g, 81%) was obtained after flash column chromatography (Et<sub>2</sub>O) as a colourless solid.

Mp 170–171 °C; IR (film) 2925 (C-H), 1682 (C=O), 1651 (C=O), 1553, 1352 (NO<sub>2</sub>); <sup>1</sup>H NMR (500 MHz, CDCl<sub>3</sub>) δ 1.92–1.97 (m, 1H, CH<sub>A</sub>H<sub>B</sub>CH<sub>2</sub>N), 2.12–2.17 (m, 1H, CH<sub>A</sub>H<sub>B</sub>CH<sub>2</sub>N), 2.67 (s, 3H, CH<sub>3</sub>N), 3.07–3.12 (m, 1H, CH<sub>2</sub>CH<sub>A</sub>H<sub>B</sub>N), 3.17–3.22 (m, 1H, CH<sub>2</sub>H<sub>A</sub>H<sub>B</sub>N), 3.67 (d, 1H, *J* = 12.0 Hz, CHPh), 3.75 (dd, 1H, *J* = 12.0 Hz, *J* = 9.5 Hz, CH<sub>A</sub>H<sub>B</sub>CHNO<sub>2</sub>), 4.05 (dd, 1H, *J* = 12.0, 6.6 Hz, CH<sub>A</sub>H<sub>B</sub>CHNO<sub>2</sub>), 4.55 (d, 1H, *J* = 14.8 Hz, NCH<sub>A</sub>H<sub>B</sub>Ph), 4.92 (d, 1H, *J* = 14.8 Hz, NCH<sub>A</sub>H<sub>B</sub>Ph), 6.33 (ddd, 1H, *J* = 12.0 Hz, *J* = 9.5, 6.6 Hz, CHNO<sub>2</sub>), 7.28–7.41 (m, 10H, H-Ar); <sup>13</sup>C NMR (125 MHz, CDCl<sub>3</sub>) δ 27.3 (CH<sub>2</sub>CH<sub>2</sub>N), 29.9 (CH<sub>3</sub>N), 47.1 (CH<sub>2</sub>CH<sub>2</sub>N), 49.0 (CH<sub>2</sub>CHNO<sub>2</sub>), 51.0 (NCH<sub>2</sub>Ph), 51.2 (CHCHPh), 56.4 (C<sub>quat</sub>), 81.2 (CHNO<sub>2</sub>), 127.8, 127.8, 128.7, 128.8, 128.8, 128.9, 133.8, 135.4 (C-Ar), 168.3, 171.2 (C=O); HRMS-ES+ (*m/z*): [M + Na]<sup>+</sup> calculated for C<sub>22</sub>H<sub>23</sub>N<sub>3</sub>NaO<sub>4</sub>, 416.1581; found, 416.1577.

### 2.2.10. Synthesis and characterization of **1i**

(±)-(5*R*,9*S*,10*R*)-7-Butyl-10-(furan-3-yl)-2-methyl-9-nitro-2,7-diazaspiro[4.5]decane-1,6-dione (**1i**)

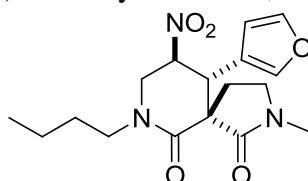

(±)-**1i**

According to general procedure B (for 5.40 mmol, 1.600 g of **6e** used 10.80 mmol, 0.790 g, 1.072 mL of butylamine (**4c**); 10.80 mmol, 811 μL of formaldehyde (**3a**, 37% solution in water) and 38 mL of MeOH; under reflux; 3 h) **1i** (1.541 g, 82%) was obtained after flash column chromatography (Et<sub>2</sub>O) and trituration (Et<sub>2</sub>O) as a colourless solid.

Mp 137 °C (Et<sub>2</sub>O); IR (film) 2958, 2933, 2874 (C-H), 1683 (C=O), 1647 (C=O), 1555, 1348 (NO<sub>2</sub>); <sup>1</sup>H NMR (500 MHz, CDCl<sub>3</sub>) δ 0.94 (t, 3H, *J* = 7.3 Hz, CH<sub>3</sub>CH<sub>2</sub>CH<sub>2</sub>), 1.34 (sxt, 2H, *J* = 7.4 Hz, CH<sub>3</sub>CH<sub>2</sub>CH<sub>2</sub>), 1.51–1.62 (m, 2H, CH<sub>3</sub>CH<sub>2</sub>CH<sub>2</sub>), 1.87–1.93 (m, 1H, CH<sub>A</sub>H<sub>B</sub>CH<sub>2</sub>NCH<sub>3</sub>), 2.75 (s, 3H, CH<sub>3</sub>N), 2.78–2.87 (m, 2H, CH<sub>A</sub>H<sub>B</sub>CH<sub>A</sub>H<sub>B</sub>NCH<sub>3</sub>), 3.38–3.47 (m, 3H, CH<sub>2</sub>CH<sub>A</sub>H<sub>B</sub>N, CH<sub>2</sub>CH<sub>2</sub>N), 3.57 (d, 1H, *J* = 11.7 Hz, CHCHAr), 3.79 (dd, 1H, *J* = 12.1, 9.0 Hz, CH<sub>A</sub>H<sub>B</sub>CHNO<sub>2</sub>), 4.07 (dd, 1H, *J* = 12.1, 6.5 Hz, CH<sub>A</sub>H<sub>B</sub>CHNO<sub>2</sub>), 6.18 (ddd, 1H, *J* = 11.6, 9.0, 6.5 Hz, CHNO<sub>2</sub>), 6.36 (s, 1H, H-Ar), 7.35–7.37 (m, 2H, H-Ar); <sup>13</sup>C NMR (125 MHz, CDCl<sub>3</sub>) δ 13.8 (CH<sub>3</sub>CH<sub>2</sub>), 20.0 (CH<sub>3</sub>CH<sub>2</sub>), 27.6 (CH<sub>2</sub>CH<sub>2</sub>NCH<sub>3</sub>), 28.8 (CH<sub>3</sub>CH<sub>2</sub>CH<sub>2</sub>), 30.1 (CH<sub>3</sub>N), 42.4 (CHCHAr), 47.7, 47.9 (CH<sub>2</sub>CH<sub>2</sub>NCH<sub>3</sub>, CH<sub>2</sub>CH<sub>2</sub>N), 49.3 (CH<sub>2</sub>CHNO<sub>2</sub>), 55.6 (C<sub>quat</sub>), 81.9 (CHNO<sub>2</sub>), 109.5, 118.8, 141.7, 143.8 (C-Ar), 167.8 (CH<sub>2</sub>NC=O), 171.4 (CH<sub>3</sub>NC=O); HRMS-ES+ (*m/z*): [M + Na]<sup>+</sup> calculated for C<sub>17</sub>H<sub>23</sub>N<sub>3</sub>NaO<sub>5</sub>, 372.1530; found, 372.1521.

### 2.2.11. Synthesis and characterization of **1j**

(±)-(5*R*,9*S*,10*R*)-10-(3-Furyl)-7-(hept-5-yn-1-yl)-2-methyl-9-nitro-2,7-diazaspiro[4.5]decane-1,6-dione (**1j**)

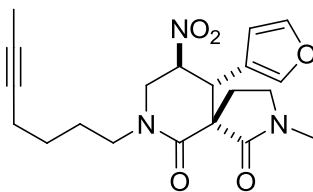

(±)-**1j**

According to general procedure B (for 6.60 mmol, 1.950 g of **6e** used 13.2 mmol, 1.468 g of amine **4d**; 13.2 mmol, 988 μL of formaldehyde (**3a**, 37% solution in water) and 48.0 mL of MeOH; under reflux; 4

h) **1j** (1.920 g, 75%) was obtained after flash column chromatography (Et<sub>2</sub>O → Et<sub>2</sub>O/MeOH 3:1) as a pale-yellow oil.

IR (film) 2923, 2865 (C-H), 1684 (C=O), 1648 (C=O), 1555, 1349 (NO<sub>2</sub>); <sup>1</sup>H NMR (400 MHz, CDCl<sub>3</sub>) δ 1.43–1.50 (m, 2H, CH<sub>2</sub>CH<sub>2</sub>CH<sub>2</sub>CH<sub>2</sub>N), 1.64–1.73 (m, 2H, CH<sub>2</sub>CH<sub>2</sub>CH<sub>2</sub>CH<sub>2</sub>N), 1.75 (t, 3H, *J* = 2.7 Hz, C≡CCH<sub>3</sub>), 1.85–1.92 (m, 1H, CH<sub>A</sub>H<sub>B</sub>CH<sub>2</sub>NCH<sub>3</sub>), 2.13–2.19 (m, 2H, CH<sub>2</sub>C≡C), 2.72–2.85 (m, 5H, NCH<sub>3</sub>, CH<sub>A</sub>H<sub>B</sub>CH<sub>A</sub>H<sub>B</sub>NCH<sub>3</sub>), 3.37–3.50 (m, 3H, CH<sub>2</sub>CH<sub>2</sub>CH<sub>2</sub>N, CH<sub>2</sub>CH<sub>A</sub>H<sub>B</sub>NCH<sub>3</sub>), 3.55 (d, 1H, *J* = 11.6 Hz, ArCHCH), 3.79 (dd, 1H, *J* = 12.1, 9.1 Hz, CH<sub>A</sub>H<sub>B</sub>CHNO<sub>2</sub>), 4.04 (dd, 1H, *J* = 12.1, 6.7 Hz, CH<sub>A</sub>H<sub>B</sub>CHNO<sub>2</sub>), 6.16 (ddd, 1H, *J* = 11.6, 9.1, 6.3 Hz, CHNO<sub>2</sub>), 6.34 (d, 1H, *J* = 1.5 Hz, H-Ar), 7.34–7.35 (m, 2H, H-Ar); <sup>13</sup>C NMR (100 MHz, CDCl<sub>3</sub>) δ 3.4 (CH<sub>3</sub>C≡C), 18.3 (CH<sub>3</sub>C≡CCH<sub>2</sub>), 25.8, 25.9 (CH<sub>2</sub>CH<sub>2</sub>CH<sub>2</sub>CH<sub>2</sub>N), 27.6 (CH<sub>2</sub>CH<sub>2</sub>NCH<sub>3</sub>), 30.0 (CH<sub>3</sub>N), 42.4 (ArCHCH), 47.5, 47.6 (CH<sub>2</sub>CH<sub>2</sub>N, CH<sub>2</sub>CH<sub>2</sub>N), 49.2 (CH<sub>2</sub>CHNO<sub>2</sub>), 55.6 (C<sub>quat</sub>), 76.0 (CH<sub>3</sub>C≡C), 78.4 (CH<sub>3</sub>C≡C), 81.8 (CHNO<sub>2</sub>), 109.4, 118.7, 141.7, 143.7 (C-Ar), 167.8, (CH<sub>2</sub>NC=O), 171.3 (CH<sub>3</sub>NC=O); HRMS–ES<sup>+</sup> (*m/z*): [M + Na]<sup>+</sup> calculated for C<sub>20</sub>H<sub>25</sub>N<sub>3</sub>NaO<sub>5</sub>, 410.1686; found, 410.1675.

### 2.2.12. Synthesis and characterization of **2a**

(±)-(1*S*,2*R*,3*R*,11*bR*)-1'-Methyl-1-nitro-2-phenyl-1,6,7,11*b*-tetrahydro-2*H*,2'*H*-spiro[pyrido[2,1-*a*]isoquinoline-3,3'-pyrrolidine]-2',4-dione (**2a**)

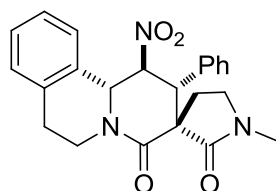

(±)-**2a**

A mixture of **6a** (0.65 mmol, 200 mg) and imine **5a** (1.31 mmol, 0.171 mg) in water (5.0 mL) was stirred at 70 °C. After 48 h the suspension was cooled to rt, and the insoluble solid was filtered off, washed successively with water (2 mL) and Et<sub>2</sub>O (5 mL), and dried to yield **2a** (0.216 g, 76%) as a colourless solid. Mp 215–216 °C; IR (film) 2933 (C-H), 1695 (C=O), 1643 (C=O), 1556, 1361 (NO<sub>2</sub>); <sup>1</sup>H NMR (500 MHz, CDCl<sub>3</sub>) δ 1.77–1.83 (m, 1H, CH<sub>A</sub>H<sub>B</sub>CH<sub>2</sub>N), 2.05–2.10 (m, 1H, CH<sub>2</sub>CH<sub>A</sub>H<sub>B</sub>N), 2.57 (s, 3H, CH<sub>3</sub>N), 2.78 (dt, 1H, *J* = 15.8 Hz, *J* = 4.7 Hz, CH<sub>A</sub>H<sub>B</sub>CH<sub>2</sub>N), 2.92–2.98 (m, 1H, CH<sub>A</sub>H<sub>B</sub>CH<sub>2</sub>N), 3.02–3.14 (m, 2H, CH<sub>A</sub>H<sub>B</sub>CH<sub>2</sub>N, CH<sub>2</sub>CH<sub>A</sub>H<sub>B</sub>N), 3.20–3.26 (m, 1H, CH<sub>2</sub>CH<sub>A</sub>H<sub>B</sub>N), 3.73 (d, 1H, *J* = 12.0 Hz, CHPh), 4.41 (dt, 1H, *J* = 12.3, 5.0 Hz, CH<sub>2</sub>CH<sub>A</sub>H<sub>B</sub>N), 5.35 (d, 1H, *J* = 8.5 Hz, NCHCH), 6.48 (dd, 1H, *J* = 12.0, 8.5 Hz, CHNO<sub>2</sub>), 7.09–7.36 (m, 9H, H-Ar); <sup>13</sup>C NMR (125 MHz, CDCl<sub>3</sub>) δ 27.2 (CH<sub>2</sub>CH<sub>2</sub>N), 28.3 (CH<sub>2</sub>CH<sub>2</sub>N), 29.9 (CH<sub>3</sub>N), 42.9 (CH<sub>2</sub>N), 47.1 (CH<sub>2</sub>N), 51.2 (CHPh), 55.6 (C<sub>quat</sub>), 58.5 (NCHCH), 87.4 (CHNO<sub>2</sub>), 123.7, 127.2, 128.0, 128.8, 128.8, 129.0, 131.4, 133.3, 134.2, 135.7 (C-Ar), 167.7, 171.0 (C=O); HRMS–ES<sup>+</sup> (*m/z*): [M + Na]<sup>+</sup> calculated for C<sub>23</sub>H<sub>23</sub>N<sub>3</sub>NaO<sub>4</sub>, 428.1581; found, 428.1586.

### 2.2.13. Synthesis and characterization of **2a** and **2a''**

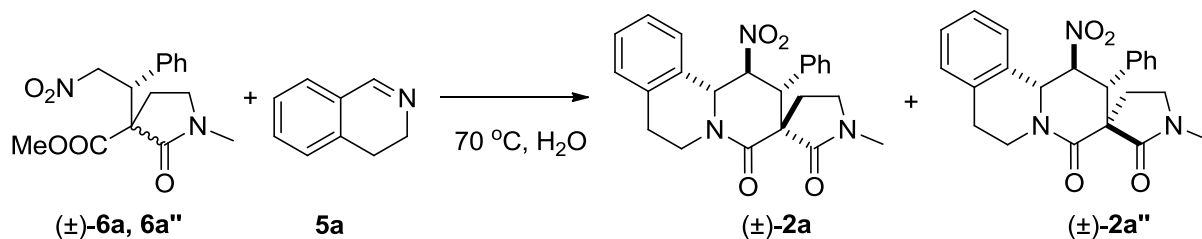

An epimeric mixture of **6a**, **6a''** (1.63 mmol, 500 mg of the epimeric mixture, dr **6a**:**6a''** 38:62) and imine **5a** (3.27 mmol, 0.428 g) in water (13.0 mL) was stirred at 70 °C. After 48 h the suspension was cooled to rt, and the insoluble solid was filtered off, washed successively with water (4 mL) and Et<sub>2</sub>O (5

mL), and dried to yield an epimeric mixture of **2a** and **2a''** (0.510 g, 72%, dr 38:62) as a colourless solid. The mixture of diastereomers was separated by flash column chromatography (EtOAc) to yield **2a** (0.197 g, 28%) and **2a''** (0.301 g, 42%).

(±)-(1*S*,2*R*,3*S*,11*bR*)-1'-Methyl-1-nitro-2-phenyl-1,6,7,11*b*-tetrahydro-2*H*,2'*H*-spiro[pyrido[2,1-*a*]isoquinoline-3,3'-pyrrolidine]-2',4-dione (**2a''**)

Mp 206–207 °C; IR (film) 2926 (C-H), 1690 (C=O), 1643 (C=O), 1556, 1361 (NO<sub>2</sub>); <sup>1</sup>H NMR (500 MHz, CDCl<sub>3</sub>) δ 1.91–1.98 (m, 1H, CH<sub>A</sub>H<sub>B</sub>CH<sub>2</sub>N), 2.17–2.22 (m, 1H, CH<sub>A</sub>H<sub>B</sub>CH<sub>2</sub>N), 2.34–2.39 (m, 1H, CH<sub>2</sub>CH<sub>A</sub>H<sub>B</sub>N) 2.65 (s, 3H, CH<sub>3</sub>N), 2.76–2.81 (m, 1H, CH<sub>A</sub>H<sub>B</sub>CH<sub>2</sub>N), 2.91–2.97 (m, 1H, CH<sub>A</sub>H<sub>B</sub>CH<sub>2</sub>N), 3.04–3.09 (m, 1H, CH<sub>2</sub>CH<sub>A</sub>H<sub>B</sub>N), 3.24 ("dt", 1H, *J* = 8.5, 5.7 Hz, CH<sub>2</sub>CH<sub>A</sub>H<sub>B</sub>N), 4.49 (d, 1H, *J* = 11.7 Hz, CHCHPh), 4.55 (dt, 1H, *J* = 8.2, 4.4 Hz, CH<sub>2</sub>CH<sub>A</sub>H<sub>B</sub>N), 5.13 (dd, 1H, *J* = 11.7, 9.1 Hz, CHNO<sub>2</sub>), 5.72 (d, 1H, *J* = 9.1 Hz, NCHCH), 7.12–7.27 (m, 9H, H-Ar); <sup>13</sup>C NMR (125 MHz, CDCl<sub>3</sub>) δ 26.0 (CH<sub>2</sub>CH<sub>2</sub>N), 27.9 (CH<sub>2</sub>CH<sub>2</sub>N), 29.2 (CH<sub>3</sub>N), 40.7, 46.1 (CH<sub>2</sub>N), 47.3 (CHPh), 55.6 (C<sub>quat</sub>), 57.0 (NCHCH), 88.7 (CHNO<sub>2</sub>), 124.1, 126.3, 127.4, 127.6, 127.8, 128.1, 131.4, 132.8, 135.2 (C-Ar), 167.5, 170.7 (C=O); HRMS–ES<sup>+</sup> (*m/z*): [M + Na]<sup>+</sup> calculated for C<sub>23</sub>H<sub>23</sub>N<sub>3</sub>NaO<sub>4</sub>, 428.1581; found, 428.1572; Anal. calcd for C<sub>23</sub>H<sub>23</sub>N<sub>3</sub>O<sub>4</sub>: C, 68.13; H, 5.72; N, 10.36; found: C, 67.93; H, 5.72; N, 10.28%.

#### 2.2.14. Synthesis and characterization of **2m** and **2m'**

According to general procedure B (for 0.50 mmol, 0.141 g of **6d** used 1.00 mmol, 0.195 g of imine **4d**; 3.0 mL of MeOH; 3.0 mL of water under reflux; 24 h) **2m** (0.011 g, 5%) and **2m'** (0.155 g, 70%) were obtained after flash column chromatography (PE/EtOAc 1:2) as off-white solids [16].

Methyl (1*S*,2*S*,3*R*,11*bR*)-9,10-dimethoxy-1-nitro-4-oxo-2-phenyl-1,3,4,6,7,11*b*-hexahydro-2*H*-pyrido[2,1-*a*]isoquinoline-3-carboxylate (**2m**)

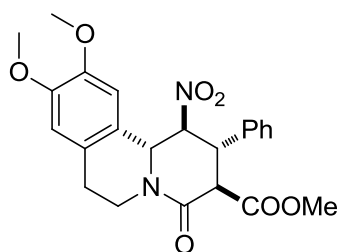

(±)-**2m**

<sup>1</sup>H NMR (400 MHz, CDCl<sub>3</sub>) δ 2.74 (dt, 1H, *J* = 15.3, 3.1 Hz, NCH<sub>2</sub>CH<sub>A</sub>H<sub>B</sub>), 2.91–3.08 (m, 2H, NCH<sub>2</sub>CH<sub>A</sub>H<sub>B</sub>, NCH<sub>A</sub>H<sub>B</sub>CH<sub>2</sub>), 3.67 (s, 3H, COOCH<sub>3</sub>), 3.77 (s, 3H, ArOCH<sub>3</sub>), 3.79 (d, 1H, *J* = 10.1 Hz, CHCOOCH<sub>3</sub>), 3.87 (s, 3H, ArOCH<sub>3</sub>), 4.27 ("t" 1H, *J* = 10.5 Hz, CHCHPh), 4.73–4.78 (m, 1H, NCH<sub>A</sub>H<sub>B</sub>CH<sub>2</sub>), 4.96 (dd, 1H, *J* = 11.1, 9.3 Hz, CHNO<sub>2</sub>), 5.37 (d, 1H, *J* = 9.1 Hz, NCHCH), 6.56 (s, 1H, H-Ar), 6.67 (s, 1H, H-Ar), 7.19–7.21 (m, 2H, H-Ar), 7.31–7.37 (m, 3H, H-Ar); <sup>13</sup>C NMR (100 MHz, CDCl<sub>3</sub>) δ 28.3 (CH<sub>2</sub>CH<sub>2</sub>N), 41.3 (CH<sub>2</sub>CH<sub>2</sub>N), 46.0 (CHCHPh), 53.0 (COOCH<sub>3</sub>), 54.1 (CHCOOCH<sub>3</sub>), 55.9, 55.9 (2 × ArOCH<sub>3</sub>), 58.2 (NCHCH), 92.8 (CHNO<sub>2</sub>), 108.0, 111.7, 123.7, 127.4, 128.1, 128.9, 129.4, 135.8, 148.8, 148.1 (C-Ar), 164.0, 168.5 (C=O); HRMS–ES<sup>+</sup> (*m/z*): [M + Na]<sup>+</sup> calculated for C<sub>23</sub>H<sub>24</sub>N<sub>2</sub>NaO<sub>7</sub>, 463.1476; found, 463.1479.

Methyl (1*R*,2*S*,3*R*,11*bR*)-9,10-dimethoxy-1-nitro-4-oxo-2-phenyl-1,3,4,6,7,11*b*-hexahydro-2*H*-pyrido[2,1-*a*]isoquinoline-3-carboxylate (**2m'**)

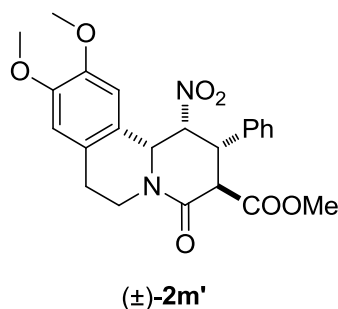

IR (film) 2952, 2838 (C-H), 1742 (C=O), 1643 (C=O), 1553, 1362 (NO<sub>2</sub>); <sup>1</sup>H NMR (400 MHz, CDCl<sub>3</sub>) δ 2.59–2.63 (m, 1H, NCH<sub>2</sub>CH<sub>A</sub>H<sub>B</sub>), 2.78–2.95 (m, 2H, NCH<sub>2</sub>CH<sub>A</sub>H<sub>B</sub>, NCH<sub>A</sub>H<sub>B</sub>CH<sub>2</sub>), 3.65 (s, 3H, COOCH<sub>3</sub>), 3.80 (s, 3H, ArOCH<sub>3</sub>), 3.84 (s, 3H, ArOCH<sub>3</sub>), 4.16 (dd, 1H, *J* = 12.6, 3.5 Hz, CHPh), 4.35 (d, 1H, *J* = 12.6 Hz, CHCOOCH<sub>3</sub>), 5.08–5.12 (m, 1H, NCH<sub>A</sub>H<sub>B</sub>CH<sub>2</sub>), 5.36 (d, 1H, *J* = 4.0 Hz, NCH), 5.49 ("t", 1H, 4.0, 3.7 Hz, CHNO<sub>2</sub>), 6.60 (s, 1H, H-Ar), 6.61 (s, 1H, H-Ar), 7.18–7.22 (m, 2H, H-Ph), 7.33–7.40 (m, 3H, H-Ph); <sup>13</sup>C NMR (100 MHz, CDCl<sub>3</sub>) δ 27.8 (CH<sub>2</sub>CH<sub>2</sub>N), 39.7 (CH<sub>2</sub>CH<sub>2</sub>N), 43.1 (CHPh), 49.4 (CHCOOCH<sub>3</sub>), 52.8 (COOCH<sub>3</sub>), 55.7 (ArOCH<sub>3</sub>), 56.0 (ArOCH<sub>3</sub>), 58.4 (CHN), 88.6 (CHNO<sub>2</sub>), 107.6, 111.8, 121.1, 127.0, 128.7, 128.9, 129.3, 134.9, 147.9, 148.5, 163.9 (C-Ar), 169.9 (2 × C=O); HRMS-ES<sup>+</sup> (*m/z*): [M + Na]<sup>+</sup> calculated for C<sub>23</sub>H<sub>24</sub>N<sub>2</sub>NaO<sub>7</sub>, 463.1476; found, 463.1474.

### 2.3. General procedure C for the nitro-group removal

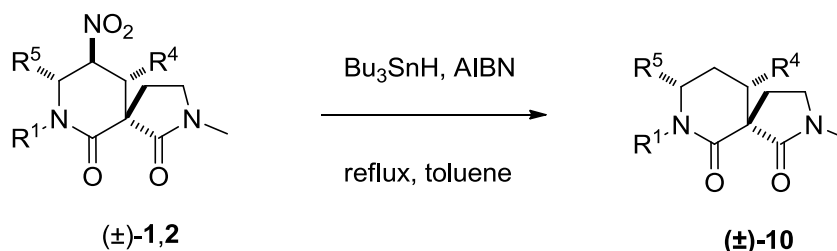

A lactam **1** or **2** was suspended in toluene (*c* = 0.05 M) under an atmosphere of N<sub>2</sub>. Bu<sub>3</sub>SnH (5 equiv) and AIBN (0.2 equiv) were added, the mixture was degassed and filled with N<sub>2</sub>. This operation was repeated three times. The mixture was stirred under reflux until all of the starting material had been consumed (TLC monitoring, typically 3–7 hours). The mixture was cooled to rt and concentrated in vacuo. The residue was purified by column chromatography to yield spirocycle **10**.

#### 2.3.1. Synthesis and characterisation of **10a**

(±)-(5*R*,10*R*)-7-Butyl-10-(furan-3-yl)-2-methyl-2,7-diazaspiro[4.5]decane-1,6-dione (**10a**)

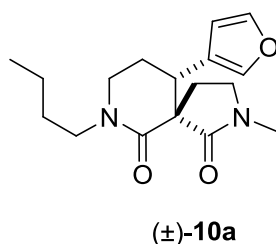

Lactam **1i** (3.29 mmol, 1.150 g) was suspended in toluene (66 mL,  $c = 0.05$  M) under an atmosphere of  $N_2$ .  $Bu_3SnH$  (5 equiv, 16.45 mmol, 4.788 g, 4.425 mL) and AIBN (0.2 equiv, 0.66 mmol, 0.108 g) were added, the suspension was degassed and filled with  $N_2$ . This operation was repeated three times. The mixture was stirred under reflux for 3 h before being cooled to rt and concentrated in vacuo. Petroleum ether (20 mL) was added, and, after 15 min at rt, the insoluble solid was filtered off and washed (petroleum ether, 15 mL). The filtration cake was purified by column chromatography ( $Et_2O$ ) to yield spirocycle **10a** (0.531 g, 53%) as a colourless solid.

Mp 129–132 °C; IR (film) 2956, 2932, 2872 (C-H), 1682 (C=O), 1633 (C=O);  $^1H$  NMR (500 MHz,  $CDCl_3$ )  $\delta$  0.92 (t, 3H,  $J = 7.3$  Hz,  $CH_3CH_2CH_2$ ), 1.34 (sxt, 2H,  $J = 7.5$  Hz,  $CH_3CH_2CH_2$ ), 1.50–1.63 (m, 2H,  $CH_3CH_2CH_2$ ), 1.70–1.74 (m, 1H,  $CH_AH_BCHAr$ ), 1.82–1.87 (m, 1H,  $CH_AH_BCH_2NCH_3$ ), 2.67–2.73 (m, 4H,  $CH_3N$ ,  $CH_2CH_AH_BNCH_3$ ), 2.81–2.86 (m, 1H,  $CH_AH_BCH_2NCH_3$ ), 2.90 (dd, 1H,  $J = 13.2$ , 2.8 Hz,  $CH_2CHAr$ ), 3.14–3.23 (m, 1H,  $CH_AH_BCHAr$ ), 3.30–3.49 (m, 5H,  $CH_2CH_AH_BNCH_3$ ,  $NCH_2CH_2CHAr$ ,  $CH_2CH_2CH_2N$ ), 6.36 (s, 1H,  $H-Ar$ ), 7.32–7.33 (m, 2H,  $H-Ar$ );  $^{13}C$  NMR (125 MHz,  $CDCl_3$ )  $\delta$  13.8 ( $CH_3CH_2$ ), 20.1 ( $CH_3CH_2$ ), 25.5 ( $CH_2CHAr$ ), 28.9 ( $CH_2CH_2NCH_3$ ), 29.0 ( $CH_3CH_2CH_2$ ), 29.8 ( $CH_3N$ ), 39.9 ( $CH_2CHAr$ ), 47.4, 47.5, 47.9 ( $CH_2CH_2NCH_3$ ,  $CH_2CH_2N$ ,  $CH_2CH_2N$ ), 55.5 ( $C_{quat}$ ), 110.1, 124.4, 139.7, 142.9 ( $C-Ar$ ), 169.5 ( $CH_2NC=O$ ), 171.4 ( $CH_3NC=O$ ); HRMS-ES+ ( $m/z$ ):  $[M + Na]^+$  calculated for  $C_{17}H_{24}N_2NaO_3$ , 327.1679; found, 327.1681.

### 2.3.2. Synthesis and characterization of **10b**

(±)-(5*R*,10*R*)-10-(3-Furyl)-7-(hept-5-yn-1-yl)-2-methyl-2,7-diazaspiro[4.5]decane-1,6-dione (**10b**)

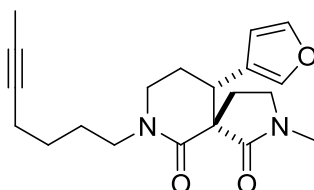

(±)-**10b**

According to general procedure C (for 4.90 mmol, 1.900 g of **1j** used 0.98 mmol, 0.160 g of AIBN; 24.50 mmol, 6.59 mL of  $Bu_3SnH$  and 98 mL of toluene; under reflux; 6h) **10b** (1.408 g, 84%) was obtained after column chromatography ( $Et_2O \rightarrow EtOAc$ ) as a pale yellow solid.

Mp 59–62 °C; IR (film) 2932, 2864 (C-H), 1682 (C=O), 1633 (C=O);  $^1H$  NMR (500 MHz,  $CDCl_3$ )  $\delta$  1.46–1.52 (m, 2H,  $CH_2CH_2CH_2CH_2N$ ), 1.65–1.77 (m, 6H,  $C\equiv CCH_3$ ,  $CH_2CH_2CH_2CH_2N$ ,  $CH_AH_BCHAr$ ), 1.82–1.87 (m, 1H,  $CH_AH_BCH_2NCH_3$ ), 2.14–2.18 (m, 2H,  $CH_2C\equiv C$ ), 2.67–2.72 (m, 4H,  $NCH_3$ ,  $CH_2CH_AH_BNCH_3$ ), 2.83 (ddd, 1H,  $J = 12.7$ , 9.4, 5.7 Hz,  $CH_AH_BCH_2NCH_3$ ), 2.91 (dd, 1H,  $J = 13.2$ , 2.8 Hz,  $CHAr$ ), 3.14–3.23 (m, 1H,  $CH_AH_BCHAr$ ), 3.32 (dt, 1H,  $J = 9.1$ , 4.5 Hz,  $CH_2CH_AH_BNCH_3$ ), 3.37–3.49 (m, 4H,  $NCH_2CH_2CHAr$ ,  $CH_2CH_2CH_2N$ ), 6.36 (s, 1H,  $H-Ar$ ), 7.32–7.33 (m, 2H,  $H-Ar$ );  $^{13}C$  NMR (125 MHz,  $CDCl_3$ )  $\delta$  3.5 ( $CH_3C\equiv C$ ), 18.5 ( $CH_3C\equiv CCH_2$ ), 25.5 ( $CH_2CHAr$ ), 26.1, 26.2 ( $CH_2CH_2CH_2CH_2N$ ), 28.9 ( $CH_2CH_2NCH_3$ ), 29.8 ( $CH_3N$ ), 39.8 ( $CH_2CHAr$ ), 47.4, 47.5, 47.6 ( $CH_2CH_2N$ ,  $CH_2CH_2N$ ,  $CH_2CH_2N$ ), 55.5 ( $C_{quat}$ ), 75.7 ( $CH_3C\equiv C$ ), 78.8 ( $CH_3C\equiv C$ ), 110.1, 124.3, 139.7, 142.9, ( $C-Ar$ ), 169.6, ( $CH_2NC=O$ ), 172.5 ( $CH_3NC=O$ ); HRMS-ES+ ( $m/z$ ):  $[M + Na]^+$  calculated for  $C_{20}H_{26}N_2NaO_3$ , 365.1836; found, 365.1836.



### 2.3.3. Synthesis and characterization of 10c

(±)-(2*R*,3*R*,11*bS*)-1'-Methyl-2-phenyl-1,6,7,11*b*-tetrahydro-2*H*-spiro[pyrido[2,1-*a*]isoquinoline-3,3'-pyrrolidine]-2',4-dione (**10c**)

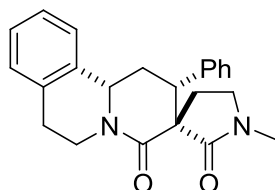

(±)-**10c**

A lactam **2a** (1.28 mmol, 520 mg) was suspended in toluene (26 mL, *c* = 0.05 M) under an atmosphere of N<sub>2</sub>, then Bu<sub>3</sub>SnH (5 equiv, 6.40 mmol, 1866 mg, 1.76 mL) and AIBN (0.2 equiv, 0.26 mmol, 42 mg) were added, and the suspension was degassed and filled with N<sub>2</sub>. The operation was repeated three times. The mixture was stirred under reflux for 5 h. The mixture was cooled to rt and concentrated in vacuo. Petroleum ether (20 mL) was added, and the insoluble solid was filtered off and washed (petroleum ether, 2 × 5 mL). The filtration cake was purified by column chromatography (EtOAc) to yield spirocycle **10c** (0.328 g, 71%) as an off-white solid.

Mp 218–220 °C (dec., EtOAc); IR (film) 2930, 2873 (C-H), 1682 (C=O), 1632 (C=O); <sup>1</sup>H NMR (500 MHz, CDCl<sub>3</sub>) δ 1.96–2.00 (m, 1H, CH<sub>A</sub>H<sub>B</sub>CH<sub>2</sub>NCH<sub>3</sub>), 2.12–2.16 (m, 1H, CH<sub>2</sub>CH<sub>A</sub>H<sub>B</sub>NCH<sub>3</sub>), 2.41–2.45 (m, 1H, NCHCH<sub>A</sub>H<sub>B</sub>CH), 2.54 (s, 3H, NCH<sub>3</sub>), 2.78 (dt, 1H, *J* = 15.5, 3.3 Hz, PhCH<sub>A</sub>H<sub>B</sub>CH<sub>2</sub>N), 2.98–3.14 (m, 4H, CH<sub>A</sub>H<sub>B</sub>CH<sub>A</sub>H<sub>B</sub>NCH<sub>3</sub>, PhCH<sub>A</sub>H<sub>B</sub>CH<sub>A</sub>H<sub>B</sub>N), 3.18 (dd, 1H, *J* = 13.6, 2.2 Hz, CH<sub>2</sub>CH<sub>A</sub>Ar), 3.28–3.35 (m, 1H, NCHCH<sub>A</sub>H<sub>B</sub>CH), 4.82–4.89 (m, 2H, NCHCH<sub>2</sub>, PhCH<sub>2</sub>CH<sub>A</sub>H<sub>B</sub>N), 7.16–7.21 (m, 4H, H-Ph), 7.29–7.32 (m, 5H, H-Ph); <sup>13</sup>C NMR (125 MHz, CDCl<sub>3</sub>) δ 28.9, 29.0 (CH<sub>2</sub>CH<sub>2</sub>N, CH<sub>2</sub>CH<sub>2</sub>N), 29.6 (CH<sub>3</sub>N), 32.5 (CHCH<sub>2</sub>CH), 40.8 (PhCH<sub>2</sub>CH<sub>2</sub>N), 46.9 (CH<sub>2</sub>CH<sub>2</sub>NCH<sub>3</sub>), 47.8 (CH<sub>2</sub>CHPh), 56.3 (C<sub>quat</sub>), 56.8 (NCHCH<sub>2</sub>), 124.9, 126.4, 126.6, 127.6, 128.4, 128.5, 128.8, 135.0, 136.9, 140.1 (C-Ar), 169.5, (CH<sub>2</sub>NC=O), 172.1 (CH<sub>3</sub>NC=O); HRMS-ES+ (*m/z*): [M + Na]<sup>+</sup> calculated for C<sub>23</sub>H<sub>24</sub>N<sub>2</sub>NaO<sub>2</sub>, 383.1730; found, 383.1725.

### 2.3.4. Synthesis and characterization of 10d

(±)-(2*R*,3*R*,12*bS*)-1'-methyl-2-phenyl-1,2,6,7,12,12*b*-hexahydro-2'*H*-spiro[indolo[2,3-*a*]quinolizine-3,3'-pyrrolidine]-2',4-dione (**10d**)

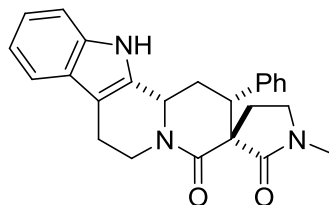

(±)-**10d**

Spirocyclic **2c** was suspended in toluene (20 mL) under an atmosphere of N<sub>2</sub>. Bu<sub>3</sub>SnH (5.56 mmol, 1.471 mL) and AIBN (0.22 mmol, 0.037 g) were added and the suspension was degassed and filled with N<sub>2</sub>. This operation was repeated three times. The suspension was stirred under reflux until all of the starting material had been consumed (4 h). The suspension was cooled to rt, and the solid precipitate was filtered off, washed with toluene (10 mL) and petroleum ether (2 × 20 mL), and dissolved in chloroform. The solution was concentrated in vacuo to yield spirocycle **10d** as a colourless solid (0.361 g, 81%).

Mp 287–290 °C; IR (film) 2911 (C-H), 1669 (C=O), 1613 (C=O); <sup>1</sup>H NMR (500 MHz, CDCl<sub>3</sub>) δ 1.96–2.01 (m, 1H, CH<sub>A</sub>H<sub>B</sub>CH<sub>2</sub>N), 2.15–2.19 (m, 1H, CH<sub>2</sub>CH<sub>A</sub>H<sub>B</sub>N), 2.28–2.33 (m, 1H, CHCH<sub>A</sub>CH<sub>B</sub>CH),

2.53 (s, 3H,  $\underline{\text{CH}}_3\text{N}$ ), 2.73–2.80 (m, 1H,  $\underline{\text{CH}}_A\text{H}_B\text{CH}_2\text{N}$ ), 2.88–3.05 (m, 3H,  $\text{CH}_A\text{H}_B\text{CH}_2\text{N}$ ,  $\text{CH}_A\text{H}_B\text{CH}_2\text{N}$ ,  $\text{CH}_2\text{CH}_A\text{H}_B\text{N}$ ), 3.09–3.15 (m, 2H,  $\underline{\text{CH}}\text{Ph}$ ,  $\text{CH}_2\text{CH}_A\text{H}_B\text{N}$ ), 3.41 (m, 1H,  $\text{CHCH}_A\text{H}_B\text{CH}$ ), 4.91 (dd, 1H,  $J = 11.4, 4.4$  Hz,  $\text{NCHCH}_2$ ), 5.13–5.21 (m, 1H,  $\text{CH}_2\text{CH}_A\text{H}_B\text{N}$ ), 7.09–7.17 (m, 2H,  $\underline{\text{H}}\text{-Ar}$ ), 7.26–7.31 (m, 6H,  $\underline{\text{H}}\text{-Ar}$ ), 7.49 (d, 1H,  $J = 7.9$  Hz,  $\underline{\text{H}}\text{-Ar}$ ), 7.89 (s, 1H,  $\text{NH}$ );  $^{13}\text{C}$  NMR (125 MHz,  $\text{CDCl}_3$ )  $\delta$  21.0 ( $\text{CH}_2\text{CH}_2\text{N}$ ), 28.9 ( $\text{CH}_2\text{CH}_2\text{N}$ ), 29.7 ( $\text{CH}_3\text{N}$ ), 31.0 ( $\text{CHCH}_2\text{CH}$ ), 41.2, 47.0 ( $2 \times \text{CH}_2\text{CH}_2\text{N}$ ), 47.3 ( $\underline{\text{CH}}\text{Ph}$ ), 54.2 ( $\text{NCHCH}_2$ ), 56.7 ( $\text{C}_{\text{quat}}$ ), 109.7, 110.9, 118.5, 119.7, 122.0, 126.9, 127.8, 128.5, 128.5, 132.7, 136.3, 139.7 ( $\underline{\text{C}}\text{-Ar}$ ), 169.6, 171.9 ( $\underline{\text{C}}=\text{O}$ ); HRMS–ES+ ( $m/z$ ):  $[\text{M} + \text{H}]^+$  calculated for  $\text{C}_{25}\text{H}_{26}\text{N}_3\text{O}_2$ , 400.2020; found, 400.2017.

## 2.4. General procedure D for the chemoselective reduction of **10**

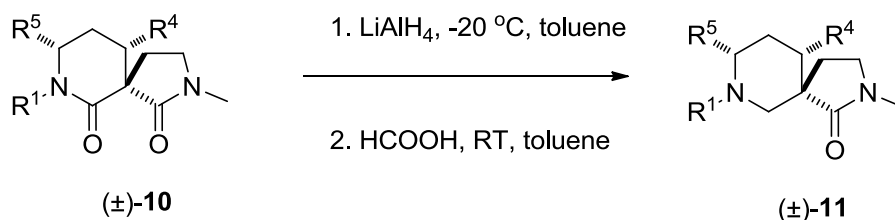

$\text{LiAlH}_4$  (3 equiv, 1 M solution in THF) was added dropwise to a solution of **10** in toluene ( $c = 0.05$  M) at  $-78^\circ\text{C}$ . The mixture was warmed to  $-20^\circ\text{C}$  and stirred for 1 h. The mixture was cooled to  $-78^\circ\text{C}$ , formic acid (71 equiv) was added dropwise with care and the mixture was warmed to rt with stirring. After 24 h Rochelle salt (20% solution in water, 20 mL per 1 mmol of **10**) was added, the pH was adjusted to 10 over 10 min by addition of solid  $\text{K}_2\text{CO}_3$  until two clear phases appeared.  $\text{Et}_2\text{O}$  was added (10 mL per mmol of **10**), the emulsion was extracted, the organic phase was separated and the water phase was further extracted ( $2 \times 10$  mL of  $\text{CH}_2\text{Cl}_2$  per mmol of **10**). The combined organics were dried ( $\text{Na}_2\text{SO}_4$ ) and concentrated in vacuo. The residue was purified by column chromatography ( $\text{Et}_2\text{O} \rightarrow \text{Et}_2\text{O}/\text{MeOH}$  90:10) to afford **11**.

### 2.4.1. Synthesis and characterization of **11a**

$(\pm)\text{-(5S,10R)-7-Butyl-10-(furan-3-yl)-2-methyl-2,7-diazaspiro[4.5]decan-1-one}$  (**11a**)

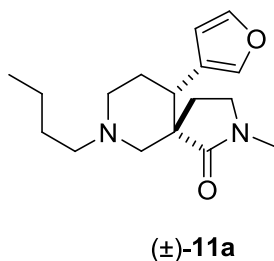

According to general procedure D (for 0.66 mmol, 0.200 g of **10a** used 1.97 mmol, 1.97 mL of 1 M  $\text{LiAlH}_4$  in THF; 49.93 mmol, 1.884 mL of formic acid and 12.8 mL of toluene) **11a** (0.155 g, 81%) was obtained as a pale yellow oil.

IR (film) 2956, 2928, 2873 ( $\text{C-H}$ ), 1676 ( $\text{C=O}$ );  $^1\text{H}$  NMR (400 MHz,  $\text{CDCl}_3$ )  $\delta$  0.90 (t, 3H,  $J = 7.3$  Hz,  $\text{CH}_3\text{CH}_2\text{CH}_2$ ), 1.26–1.35 (m, 2H,  $\text{CH}_3\text{CH}_2\text{CH}_2$ ), 1.46–1.65 (m, 4H,  $\text{CH}_3\text{CH}_2\text{CH}_2$ ,  $\text{CH}_A\text{H}_B\text{CH}_2\text{NCH}_3$ ,  $\text{CH}_2\text{CH}_A\text{H}_B\text{CHAr}$ ), 1.89–2.06 (m, 3H,  $\text{NCH}_A\text{H}_B\text{C}_{\text{quat}}$ ,  $\text{CH}_A\text{H}_B\text{CH}_A\text{H}_B\text{CHAr}$ ), 2.26–2.41 (m, 3H,  $\text{CH}_2\text{CHAr}$ ,  $\text{CH}_2\text{CH}_2\text{CH}_2\text{N}$ ), 2.65–2.80 (m, 5H,  $\text{CH}_3\text{N}$ ,  $\text{CH}_A\text{H}_B\text{CH}_A\text{H}_B\text{NCH}_3$ ), 3.03–3.13 (m, 3H,  $\text{NCH}_A\text{H}_B\text{C}_{\text{quat}}$ ,  $\text{CH}_2\text{CH}_A\text{H}_B\text{NCH}_3$ ,  $\text{CH}_A\text{H}_B\text{CH}_2\text{CHAr}$ ), 6.37 (s, 1H,  $\underline{\text{H}}\text{-Ar}$ ), 7.30–7.31 (m, 2H,  $\underline{\text{H}}\text{-Ar}$ );  $^{13}\text{C}$  NMR (100 MHz,  $\text{CDCl}_3$ )  $\delta$  14.1 ( $\text{CH}_3\text{CH}_2$ ), 20.8 ( $\text{CH}_3\text{CH}_2$ ), 28.9, 29.3, 29.7, 31.1 ( $\text{CH}_3\text{CH}_2\text{CH}_2$ ,  $\text{CH}_2\text{CHAr}$ ,  $\text{CH}_2\text{CH}_2\text{NCH}_3$ ,  $\text{CH}_3\text{N}$ ), 41.3 ( $\text{CH}_2\text{CHAr}$ ), 45.8 ( $\text{CH}_2\text{CH}_2\text{NCH}_3$ ), 46.5 ( $\text{C}_{\text{quat}}$ ), 54.4 ( $\text{CH}_2\text{CH}_2\text{CHAr}$ ), 58.8 ( $\text{CH}_2\text{CH}_2\text{CH}_2\text{N}$ ), 61.9 ( $\text{NCH}_2\text{C}_{\text{quat}}$ ), 110.8, 125.5, 139.8, 142.5 ( $\underline{\text{C}}\text{-Ar}$ ), 175.4 ( $\underline{\text{C}}=\text{O}$ ); HRMS–ES+ ( $m/z$ ):  $[\text{M} + \text{H}]^+$  calculated for  $\text{C}_{17}\text{H}_{27}\text{O}_2\text{N}_2$ , 291.2067; found, 291.2071.

## 2.4.2. Synthesis and characterization of 11b

(±)-(5*S*,10*R*)-10-(3-Furyl)-7-(hept-5-yn-1-yl)-2-methyl-2,7-diazaspiro[4.5]decan-1-one (**11b**)

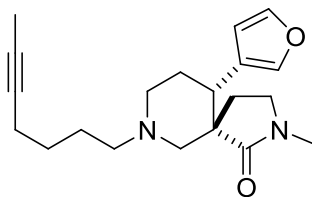

(±)-**11b**

According to general procedure D (for 0.59 mmol, 0.200 g of **10b** used 1.76 mmol, 1.76 mL of 1 M LiAlH<sub>4</sub> in THF; 42.50 mmol, 1.60 mL of formic acid and 11.8 mL of toluene) **11b** (0.148 g, 77%) was obtained after column chromatography (Et<sub>2</sub>O → Et<sub>2</sub>O/MeOH 90:10) as a pale yellow oil.

IR (film) 2936, 2920, 2866 (C-H), 1681 (C=O); <sup>1</sup>H NMR (400 MHz, CDCl<sub>3</sub>) δ 1.44–1.65 (m, 6H, CH<sub>2</sub>CH<sub>2</sub>CH<sub>2</sub>N, CH<sub>A</sub>H<sub>B</sub>CH<sub>2</sub>NCH<sub>3</sub>, CH<sub>2</sub>CH<sub>A</sub>H<sub>B</sub>CHAr), 1.78 (t, 3H, *J* = 7.3 Hz, C≡CCH<sub>3</sub>), 1.87–1.99 (m, 3H, NCH<sub>A</sub>H<sub>B</sub>C<sub>quat</sub>, CH<sub>A</sub>H<sub>B</sub>CH<sub>A</sub>H<sub>B</sub>CHAr), 2.12–2.17 (m, 2H, C≡CCH<sub>2</sub>), 2.22–2.29 (m, 1H, CH<sub>2</sub>CH<sub>2</sub>CH<sub>A</sub>H<sub>B</sub>N), 2.35–2.42 (m, 2H, CH<sub>2</sub>CHAr, CH<sub>2</sub>CH<sub>2</sub>CH<sub>A</sub>H<sub>B</sub>N), 2.65–2.81 (m, 5H, CH<sub>3</sub>N, CH<sub>A</sub>H<sub>B</sub>CH<sub>A</sub>H<sub>B</sub>NCH<sub>3</sub>), 3.03–3.14 (m, 3H, NCH<sub>A</sub>H<sub>B</sub>C<sub>quat</sub>, CH<sub>2</sub>CH<sub>A</sub>H<sub>B</sub>NCH<sub>3</sub>, CH<sub>A</sub>H<sub>B</sub>CH<sub>2</sub>CHAr), 6.37 (s, 1H, H-Ar), 7.30–7.31 (m, 2H, H-Ar); <sup>13</sup>C NMR (100 MHz, CDCl<sub>3</sub>) δ 3.4 (CH<sub>3</sub>C≡C), 18.5 (C≡CCH<sub>2</sub>), 25.8, 26.9 (CH<sub>2</sub>CH<sub>2</sub>CH<sub>2</sub>N), 29.1 (CH<sub>2</sub>CH<sub>2</sub>NCH<sub>3</sub>), 29.5 (CH<sub>3</sub>N), 30.8 (CH<sub>2</sub>CHAr), 41.1 (CH<sub>2</sub>CHAr), 45.7 (CH<sub>2</sub>CH<sub>2</sub>NCH<sub>3</sub>), 46.4 (C<sub>quat</sub>), 54.2 (CH<sub>2</sub>CH<sub>2</sub>CHAr), 58.3 (CH<sub>2</sub>CH<sub>2</sub>CH<sub>2</sub>N), 61.6 (NCH<sub>2</sub>C<sub>quat</sub>), 75.3 (CH<sub>3</sub>C≡C), 79.1 (CH<sub>3</sub>C≡C), 110.7, 125.3, 139.6, 142.3 (C-Ar), 175.2 (C=O); HRMS–ES<sup>+</sup> (*m/z*): [M + H]<sup>+</sup> calculated for C<sub>20</sub>H<sub>29</sub>N<sub>2</sub>O<sub>2</sub>, 329.2224; found, 329.2215.

## 2.4.3. Synthesis and characterization of 11c

(±)-(2*R*,3*S*,11*bS*)-1'-Methyl-2-phenyl-1,6,7,11*b*-tetrahydro-2*H*,2'*H*-spiro[pyrido[2,1-*a*]isoquinoline-3,3'-pyrrolidin]-2'-one (**11c**)

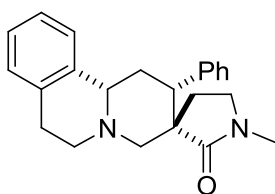

(±)-**11c**

According to general procedure D (for 0.28 mmol, 0.100 g of **10c** used 0.83 mmol, 0.83 mL of 1 M LiAlH<sub>4</sub> in THF; 20.16 mmol, 0.76 mL of formic acid and 5.6 mL of toluene) **11c** (0.068 g, 71%) was obtained as a pale yellow solid.

Mp 218–220 °C (dec., EtOAc); IR (film) 2930, 2873 (C-H), 1681 (C=O); <sup>1</sup>H NMR (400 MHz, CDCl<sub>3</sub>) δ 1.67–1.74 (m, 1H, CH<sub>A</sub>H<sub>B</sub>CH<sub>2</sub>NCH<sub>3</sub>), 1.96 (ddd, 1H, *J* = 12.8, 8.3, 4.2 Hz, CH<sub>A</sub>H<sub>B</sub>CH<sub>2</sub>NCH<sub>3</sub>), 2.15–2.25 (m, 2H, NCHCH<sub>A</sub>H<sub>B</sub>CHPh, CH<sub>2</sub>CH<sub>A</sub>H<sub>B</sub>NCH<sub>3</sub>), 2.45–2.52 (m, 2H, NCH<sub>A</sub>H<sub>B</sub>C<sub>quat</sub>, PhCH<sub>2</sub>CH<sub>A</sub>H<sub>B</sub>N), 2.59 (s, 3H, CH<sub>3</sub>N), 2.68–2.88 (m, 3H, CH<sub>2</sub>CHAr, NCHCH<sub>A</sub>H<sub>B</sub>CHPh, PhCH<sub>A</sub>H<sub>B</sub>CH<sub>2</sub>N), 2.95 (dt, 1H, *J* = 9.2, 4.2 Hz, CH<sub>2</sub>CH<sub>A</sub>H<sub>B</sub>NCH<sub>3</sub>), 3.03–3.08 (m, 1H, PhCH<sub>2</sub>CH<sub>A</sub>H<sub>B</sub>N), 3.15 (d, 1H, *J* = 11.9 Hz, NCH<sub>A</sub>H<sub>B</sub>C<sub>quat</sub>), 3.29–3.36 (m, 2H, NCHCH<sub>2</sub>CHPh, PhCH<sub>A</sub>H<sub>B</sub>CH<sub>2</sub>N), 7.07–7.20 (m, 4H, H-Ph), 7.24–7.35 (m, 5H, H-Ph); <sup>13</sup>C NMR (100 MHz, CDCl<sub>3</sub>) δ 29.6, 29.6 (CH<sub>3</sub>N, PhCH<sub>2</sub>CH<sub>2</sub>N), 30.6 (CH<sub>2</sub>CH<sub>2</sub>NCH<sub>3</sub>), 34.2 (NCHCH<sub>2</sub>CH), 45.6 (CH<sub>2</sub>CH<sub>2</sub>NCH<sub>3</sub>), 46.9 (C<sub>quat</sub>), 52.0 (PhCH<sub>2</sub>CH<sub>2</sub>N), 52.8 (NCHCH<sub>2</sub>CHAr), 63.7 (NCHCH<sub>2</sub>), 65.0 (NCH<sub>2</sub>C<sub>quat</sub>), 124.9, 125.5, 125.8, 127.1, 128.2, 128.8, 128.9, 135.0, 137.7, 141.6 (C-Ph), 175.1 (C=O); HRMS–ES<sup>+</sup> (*m/z*): [M + H]<sup>+</sup> calculated for C<sub>23</sub>H<sub>27</sub>N<sub>2</sub>O, 347.2118; found, 347.2215.

#### 2.4.4. Synthesis and characterization of 12a

(±)-(2*R*,3*R*,12*bS*)-1'-Methyl-2-phenyl-1,2,6,7,12,12*b*-hexahydrospiro[indolo[2,3-*a*]quinolizine-3,3'-pyrrolidine] (**12a**)

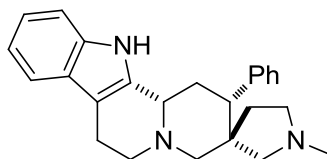

(±)-**12a**

A suspension of spirocycle **10d** (0.25 mmol, 0.100 g) in THF (4 mL) was cooled to  $-78\text{ }^{\circ}\text{C}$  and DIBAL (2.5 mmol, 2.5 mL of 1 M solution in cyclohexane) was added dropwise at  $-78\text{ }^{\circ}\text{C}$  under an atmosphere of  $\text{N}_2$ . The mixture was allowed to warm to rt and stirred for 24 h. The mixture was then cooled to  $0\text{ }^{\circ}\text{C}$  and 1 M HCl (1 mL) was carefully added. After 5 min of stirring the pH of the mixture was adjusted to 12 and the mixture was extracted with DCM ( $3 \times 5\text{ mL}$ ). The combined organic layers were dried ( $\text{Na}_2\text{SO}_4$ ) and concentrated in vacuo. The crude product was purified by flash column chromatography (DCM/MeOH 80:20) to yield spirocycle **12a** (0.066 g, 71%) as a colourless solid.

Mp  $246\text{--}248\text{ }^{\circ}\text{C}$ ;  $^1\text{H}$  NMR (500 MHz,  $\text{CDCl}_3$ )  $\delta$  1.28–1.33 (m, 1H,  $\text{CH}_\text{A}\text{H}_\text{B}\text{CH}_2$ ), 1.38–1.43 (m, 1H,  $\text{CH}_\text{A}\text{H}_\text{B}\text{CH}_2$ ), 1.79–2.01 (m, 3H,  $\text{CHCH}_2\text{CH}$ ,  $\text{CH}_\text{A}\text{H}_\text{B}\text{CH}_2$ ), 2.07 (s, 3H,  $\text{CH}_3\text{N}$ ), 2.22 (d, 1H,  $J = 9.6\text{ Hz}$ ,  $\text{CHNCH}_\text{A}\text{H}_\text{B}\text{C}_\text{quat}$ ), 2.32 (d, 1H,  $J = 11.4\text{ Hz}$ ,  $\text{CH}_3\text{NCH}_\text{A}\text{H}_\text{B}\text{C}_\text{quat}$ ), 2.53–2.67 (m, 3H,  $\text{CH}_\text{A}\text{H}_\text{B}\text{CH}_2$ ,  $\text{CH}_\text{A}\text{H}_\text{B}\text{CH}_2$ ,  $\text{CH}_\text{A}\text{H}_\text{B}\text{CH}_2$ ), 2.72 (dd, 1H,  $J = 13.1\text{ Hz}$ ,  $J = 3.0\text{ Hz}$ ,  $\text{CHCHPh}$ ), 2.88–3.05 (m, 3H,  $\text{CH}_3\text{NCH}_\text{A}\text{H}_\text{B}\text{C}_\text{quat}$ ,  $\text{CH}_\text{A}\text{H}_\text{B}\text{CH}_2$ ,  $\text{CH}_\text{A}\text{H}_\text{B}\text{CH}_2$ ), 3.19 (d, 1H,  $J = 9.6\text{ Hz}$ ,  $\text{CHNCH}_\text{A}\text{H}_\text{B}\text{C}_\text{quat}$ ), 3.29 (broad d, 1H,  $J = 10.7\text{ Hz}$ ,  $\text{NCHCH}_2$ ), 7.00–7.27 (m, 8H,  $\text{H-Ar}$ ), 7.42 (d, 1H,  $J = 7.6\text{ Hz}$ ,  $\text{H-Ar}$ ), 7.64 (broad s, 1H,  $\text{NH}$ );  $^{13}\text{C}$  NMR (125 MHz,  $\text{CDCl}_3$ )  $\delta$  21.8 ( $\text{CH}_2\text{CH}_2\text{N}$ ), 34.0 ( $\text{CHCH}_2\text{CH}$ ), 34.7 ( $\text{CH}_2\text{CH}_2\text{N}$ ), 42.2 ( $\text{CH}_3\text{N}$ ), 46.8 ( $\text{C}_\text{quat}$ ), 50.5 ( $\text{CHPh}$ ), 52.7 ( $\text{CH}_2\text{CH}_2\text{N}$ ), 55.3 ( $\text{CH}_2\text{CH}_2\text{N}$ ), 59.9 ( $\text{CHNCH}_2\text{C}_\text{quat}$ ), 60.0 ( $\text{NCHCH}_2$ ), 67.8 ( $\text{CH}_3\text{NCH}_2\text{C}_\text{quat}$ ), 108.5, 110.7, 118.2, 119.4, 121.4, 126.8, 127.4, 128.0, 129.7, 134.6, 135.9, 141.5 ( $\text{C-Ar}$ ); HRMS-ES+ ( $m/z$ ):  $[\text{M} + \text{H}]^+$  calculated for  $\text{C}_{25}\text{H}_{30}\text{N}_3$ , 372.2445; found, 372.2433; Anal. calcd for  $\text{C}_{25}\text{H}_{29}\text{N}_3$ : C, 80.82; H, 7.87; N, 11.31; found: C, 79.75; H, 7.90; N, 11.14%.

#### 2.4.5. Synthesis and characterization of 12b

(±)-(5*R*,10*S*)-7-Butyl-10-(furan-3-yl)-2-methyl-2,7-diazaspiro[4.5]decane (**12b**)

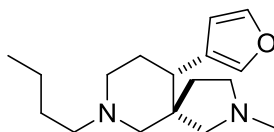

(±)-**12b**

A solution of spirocycle **10a** (0.33 mmol, 0.100 g) in THF (4 mL) was cooled to  $-78\text{ }^{\circ}\text{C}$  and DIBAL (10 equiv, 3.30 mmol, 3.3 mL of 1 M solution in toluene) was added dropwise under an atmosphere of  $\text{N}_2$ . The mixture was allowed to warm to rt and stirred. After 4 d, MeOH (1 mL) was added carefully to the mixture and it was stirred for 1 h at rt.  $\text{Na}_2\text{SO}_4 \cdot 10\text{ H}_2\text{O}$  (0.500 g) and  $\text{Et}_2\text{O}$  (8 mL) were added and the resulting suspension was vigorously stirred at rt. After 30 min the insoluble solid was filtered off, washed ( $\text{Et}_2\text{O}$ ,  $2 \times 4\text{ mL}$ ) and the filtrate was concentrated in vacuo. The residue was purified by column chromatography ( $\text{Et}_2\text{O} \rightarrow \text{Et}_2\text{O}/\text{MeOH}$  75:25) affording **12b** (0.068 g, 75%) as a pale-yellow oil.

IR (film) 2956, 2933 (C-H);  $^1\text{H}$  NMR (400 MHz,  $\text{CDCl}_3$ )  $\delta$  0.91 (t, 3H,  $J = 7.3\text{ Hz}$ ,  $\text{CH}_3\text{CH}_2\text{CH}_2$ ), 1.32 (sxt, 2H,  $J = 7.3\text{ Hz}$ ,  $\text{CH}_3\text{CH}_2\text{CH}_2$ ), 1.41–1.53 (m, 3H,  $\text{CH}_3\text{CH}_2\text{CH}_2$ ,  $\text{CH}_\text{A}\text{H}_\text{B}\text{CH}_2\text{NCH}_3$ ), 1.65–1.70 (m, 2H,  $\text{CH}_2\text{CH}_2\text{CHAr}$ ), 1.73–1.85 (m, 3H,  $\text{C}_\text{quat}\text{CH}_\text{A}\text{H}_\text{B}\text{N}$ ,  $\text{CH}_\text{A}\text{H}_\text{B}\text{CH}_\text{A}\text{H}_\text{B}\text{NCH}_3$ ), 1.95–2.04 (m, 1H,

CH<sub>A</sub>H<sub>B</sub>CH<sub>2</sub>CHAr), 2.21–2.23 (m, 4H, CH<sub>3</sub>N, NCH<sub>A</sub>H<sub>B</sub>C<sub>quat</sub>), 2.26–2.43 (m, 3H, CH<sub>2</sub>CH<sub>2</sub>CH<sub>2</sub>N, CH<sub>2</sub>CHAr), 2.59–2.64 (m, 1H, CH<sub>2</sub>CH<sub>A</sub>H<sub>B</sub>NCH<sub>3</sub>), 2.82–2.93 (m, 3H, C<sub>quat</sub>CH<sub>A</sub>H<sub>B</sub>NCH<sub>3</sub>, NCH<sub>A</sub>H<sub>B</sub>C<sub>quat</sub>, NCH<sub>A</sub>H<sub>B</sub>CH<sub>2</sub>CHAr), 6.33 (s, 1H, H-Ar), 7.28 (broad s, 1H, H-Ar), 7.37 (d, 1H, *J* = 1.5 Hz, H-Ar); <sup>13</sup>C NMR (100 MHz, CDCl<sub>3</sub>) δ 14.0 (CH<sub>3</sub>CH<sub>2</sub>), 20.7 (CH<sub>3</sub>CH<sub>2</sub>), 29.2 (CH<sub>3</sub>CH<sub>2</sub>CH<sub>2</sub>), 30.3 (CH<sub>2</sub>CH<sub>2</sub>CHAr), 36.6 (CH<sub>2</sub>CH<sub>2</sub>NCH<sub>3</sub>), 41.7 (CH<sub>2</sub>CHAr), 42.3 (CH<sub>3</sub>N), 45.9 (C<sub>quat</sub>), 54.0 (NCH<sub>2</sub>CH<sub>2</sub>CHAr), 55.6 (CH<sub>2</sub>CH<sub>2</sub>NCH<sub>3</sub>), 58.3 (CH<sub>2</sub>CH<sub>2</sub>CH<sub>2</sub>N), 61.2 (NCH<sub>2</sub>C<sub>quat</sub>), 65.6 (C<sub>quat</sub>CH<sub>2</sub>NCH<sub>3</sub>), 111.5, 126.2, 139.7, 142.2 (C-Ar); HRMS–ES<sup>+</sup> (*m/z*): [M + H]<sup>+</sup> calculated for C<sub>17</sub>H<sub>29</sub>N<sub>2</sub>O, 277.2274; found, 277.2273.

### 3. Elucidation of relative configuration:

The relative stereochemistry of compounds **1** and **2** was elucidated based on a combination of NMR techniques (coupling constant on 6-membered ring, n.O. effects and a comparison of <sup>1</sup>H NMR data) and single-crystal X-ray analysis.

#### 3.1. nOes

##### 3.1.1. nOes of compound **1c**

(selected irradiation)

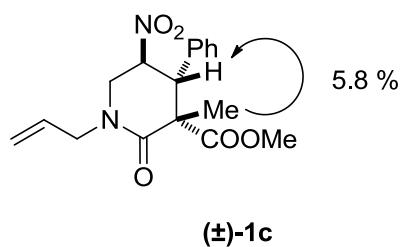

## 3.2. Single-crystal X-ray crystallography

### 3.2.1. X-ray crystal structure of compound ( $\pm$ )-6e

#### Crystal data and structure refinement for 6e.

|                                                   |                                                                                                                   |
|---------------------------------------------------|-------------------------------------------------------------------------------------------------------------------|
| Identification code                               | 6110                                                                                                              |
| $C_{13}H_{16}N_2O_6$                              | $F(000) = 624$                                                                                                    |
| $M_r = 296.28$                                    | $D_x = 1.439 \text{ Mg m}^{-3}$                                                                                   |
| Monoclinic, $P2_1/n$                              | Melting point: not measured K                                                                                     |
| Hall symbol: $-P 2_1 n$                           | Mo $K\alpha$ radiation, $\lambda = 0.71073 \text{ \AA}$                                                           |
| $a = 6.6527 (1) \text{ \AA}$                      | Cell parameters from 3228 reflections                                                                             |
| $b = 14.3997 (2) \text{ \AA}$                     | $\theta = 5\text{--}27^\circ$                                                                                     |
| $c = 14.2861 (2) \text{ \AA}$                     | $\mu = 0.12 \text{ mm}^{-1}$                                                                                      |
| $\beta = 91.7612 (6)^\circ$                       | $T = 150 \text{ K}$                                                                                               |
| $V = 1367.92 (3) \text{ \AA}^3$                   | Plate, Clear_pale_colourless                                                                                      |
| $Z = 4$                                           | $0.48 \times 0.16 \times 0.10 \text{ mm}$                                                                         |
| Data collection                                   |                                                                                                                   |
| Area                                              | 2479 reflections with $I > 2.0\sigma(I)$                                                                          |
| diffractometer                                    |                                                                                                                   |
| graphite                                          | $R_{\text{int}} = 0.038$                                                                                          |
| $\omega$ scans                                    | $\theta_{\text{max}} = 27.5^\circ$ , $\theta_{\text{min}} = 5.1^\circ$                                            |
| Absorption correction: Multi-scan                 | $h = -8 \rightarrow 8$                                                                                            |
| <i>DENZO/SCALEPACK</i> (Otwinowski & Minor, 1997) |                                                                                                                   |
| $T_{\text{min}} = 0.83$ , $T_{\text{max}} = 0.99$ | $k = -18 \rightarrow 18$                                                                                          |
| 21820 measured reflections                        | $l = -18 \rightarrow 18$                                                                                          |
| 3120 independent reflections                      |                                                                                                                   |
| Refinement                                        |                                                                                                                   |
| Refinement on $F^2$                               | Primary atom site location: Structure-invariant direct methods                                                    |
| Least-squares matrix: Full                        | Hydrogen site location: Inferred from neighbouring sites                                                          |
| $R[F^2 > 2\sigma(F^2)] = 0.036$                   | H-atom parameters constrained                                                                                     |
| $wR(F^2) = 0.087$                                 | Method = Modified Sheldrick $w = 1/[\sigma^2(F^2) + (0.04P)^2 + 0.63P]$ , where $P = (\max(F_o^2, 0) + 2F_c^2)/3$ |
| $S = 0.94$                                        | $(\Delta/\sigma)_{\text{max}} = 0.001$                                                                            |
| 3120 reflections                                  | $\Delta\rho_{\text{max}} = 0.35 \text{ e \AA}^{-3}$                                                               |
| 190 parameters                                    | $\Delta\rho_{\text{min}} = -0.31 \text{ e \AA}^{-3}$                                                              |
| 0 restraints                                      |                                                                                                                   |

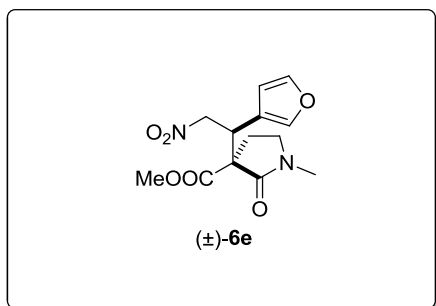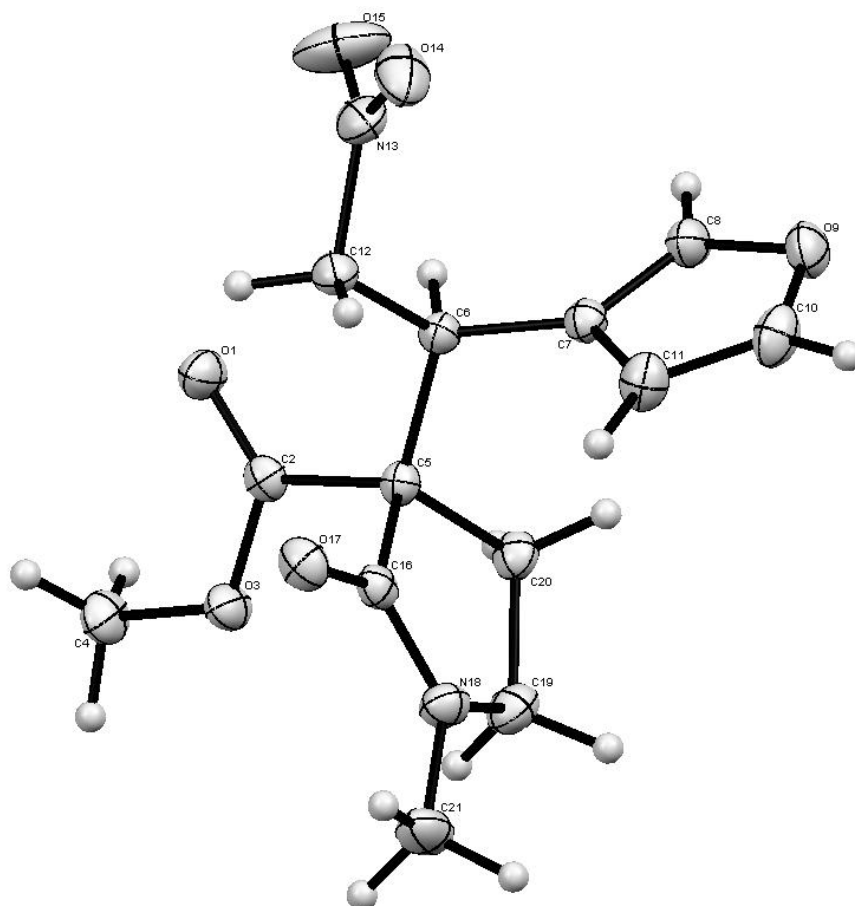

### 3.2.2. X-ray crystal structure of compound ( $\pm$ )-1g

#### Crystal data and structure refinement for 1g.

|                                   |                                                               |                       |
|-----------------------------------|---------------------------------------------------------------|-----------------------|
| Identification code               | s2730abs                                                      |                       |
| Empirical formula                 | C <sub>19</sub> H <sub>21</sub> N <sub>3</sub> O <sub>6</sub> |                       |
| Formula weight                    | 387.39                                                        |                       |
| Temperature                       | 100(2) K                                                      |                       |
| Wavelength                        | 0.71073 Å                                                     |                       |
| Crystal system                    | Orthorhombic                                                  |                       |
| Space group                       | Pna2 <sub>1</sub>                                             |                       |
| Unit cell dimensions              | a = 11.405(2) Å                                               | $\alpha = 90^\circ$ . |
|                                   | b = 14.943(3) Å                                               | $\beta = 90^\circ$ .  |
|                                   | c = 10.8676(18) Å                                             | $\gamma = 90^\circ$ . |
| Volume                            | 1852.2(6) Å <sup>3</sup>                                      |                       |
| Z                                 | 4                                                             |                       |
| Density (calculated)              | 1.389 Mg/m <sup>3</sup>                                       |                       |
| Absorption coefficient            | 0.105 mm <sup>-1</sup>                                        |                       |
| F(000)                            | 816                                                           |                       |
| Crystal size                      | 0.55 x 0.50 x 0.50 mm <sup>3</sup>                            |                       |
| Theta range for data collection   | 2.25 to 26.37°.                                               |                       |
| Index ranges                      | -14 ≤ h ≤ 13, -18 ≤ k ≤ 18, -8 ≤ l ≤ 13                       |                       |
| Reflections collected             | 10299                                                         |                       |
| Independent reflections           | 1996 [R(int) = 0.0250]                                        |                       |
| Completeness to theta = 26.37°    | 99.7 %                                                        |                       |
| Absorption correction             | Semi-empirical from equivalents                               |                       |
| Max. and min. transmission        | 0.9495 and 0.9446                                             |                       |
| Refinement method                 | Full-matrix least-squares on F <sup>2</sup>                   |                       |
| Data / restraints / parameters    | 1996 / 1 / 255                                                |                       |
| Goodness-of-fit on F <sup>2</sup> | 1.091                                                         |                       |
| Final R indices [I > 2σ(I)]       | R1 = 0.0271, wR2 = 0.0667                                     |                       |
| R indices (all data)              | R1 = 0.0280, wR2 = 0.0672                                     |                       |
| Largest diff. peak and hole       | 0.211 and -0.155 e.Å <sup>-3</sup>                            |                       |



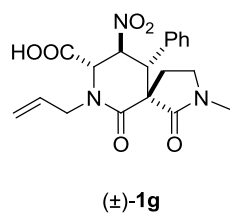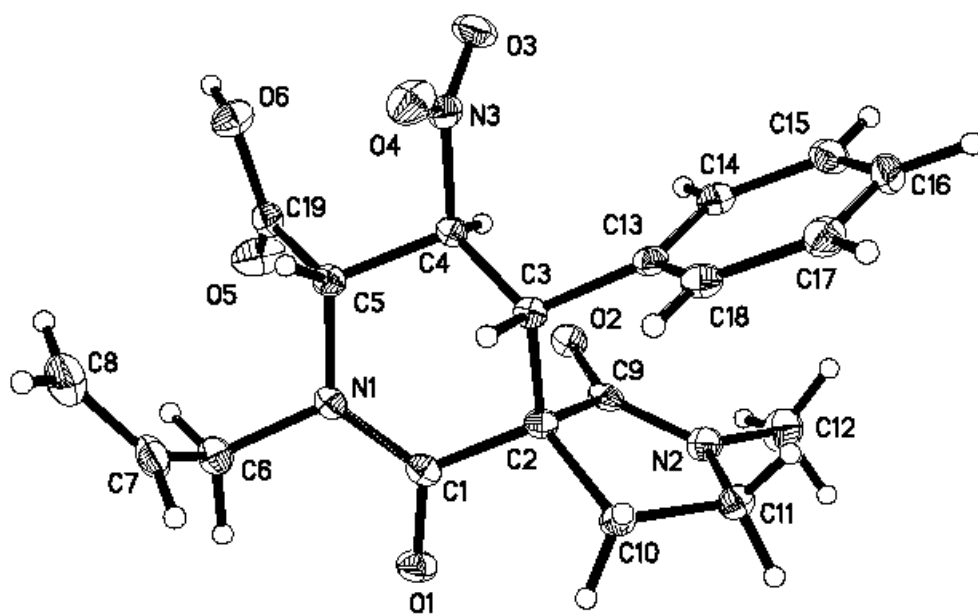

### 3.2.3. X-ray crystal structure of compound ( $\pm$ )-2a

#### Crystal data and structure refinement for 2a.

|                                   |                                                               |                               |
|-----------------------------------|---------------------------------------------------------------|-------------------------------|
| Identification code               | s2668abs                                                      |                               |
| Empirical formula                 | C <sub>23</sub> H <sub>23</sub> N <sub>3</sub> O <sub>4</sub> |                               |
| Formula weight                    | 405.44                                                        |                               |
| Temperature                       | 100(2) K                                                      |                               |
| Wavelength                        | 0.71073 Å                                                     |                               |
| Crystal system                    | Monoclinic                                                    |                               |
| Space group                       | Pn                                                            |                               |
| Unit cell dimensions              | a = 6.4732(5) Å                                               | $\alpha = 90^\circ$ .         |
|                                   | b = 10.4674(7) Å                                              | $\beta = 95.0500(10)^\circ$ . |
|                                   | c = 14.5108(10) Å                                             | $\gamma = 90^\circ$ .         |
| Volume                            | 979.40(12) Å <sup>3</sup>                                     |                               |
| Z                                 | 2                                                             |                               |
| Density (calculated)              | 1.375 Mg/m <sup>3</sup>                                       |                               |
| Absorption coefficient            | 0.095 mm <sup>-1</sup>                                        |                               |
| F(000)                            | 428                                                           |                               |
| Crystal size                      | 0.60 x 0.30 x 0.30 mm <sup>3</sup>                            |                               |
| Theta range for data collection   | 1.95 to 26.39°.                                               |                               |
| Index ranges                      | -8 ≤ h ≤ 8, -12 ≤ k ≤ 13, -18 ≤ l ≤ 18                        |                               |
| Reflections collected             | 7591                                                          |                               |
| Independent reflections           | 2000 [R(int) = 0.0141]                                        |                               |
| Completeness to theta = 26.39°    | 99.5 %                                                        |                               |
| Absorption correction             | Semi-empirical from equivalents                               |                               |
| Max. and min. transmission        | 0.9719 and 0.9449                                             |                               |
| Refinement method                 | Full-matrix least-squares on F <sup>2</sup>                   |                               |
| Data / restraints / parameters    | 2000 / 2 / 272                                                |                               |
| Goodness-of-fit on F <sup>2</sup> | 1.088                                                         |                               |
| Final R indices [I > 2σ(I)]       | R1 = 0.0273, wR2 = 0.0713                                     |                               |
| R indices (all data)              | R1 = 0.0276, wR2 = 0.0715                                     |                               |
| Largest diff. peak and hole       | 0.235 and -0.167 e.Å <sup>-3</sup>                            |                               |

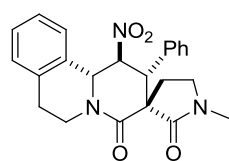

(±)-2a

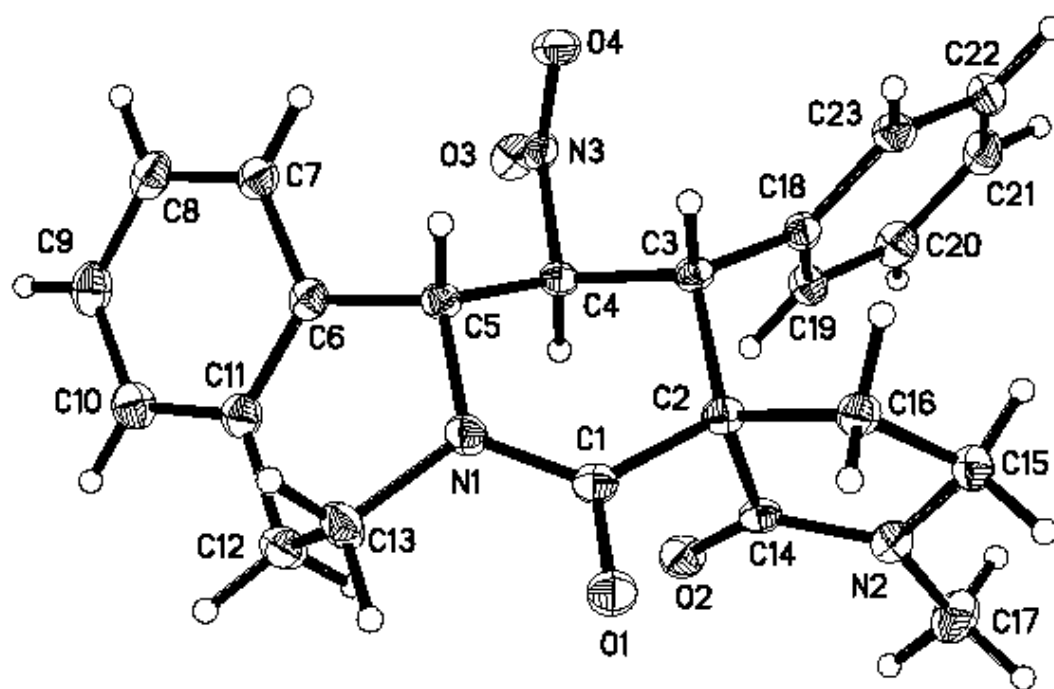

### 3.2.4. X-ray crystal structure of compound ( $\pm$ )-2a''

#### Crystal data and structure refinement for 2a''.

|                                   |                                                               |                       |
|-----------------------------------|---------------------------------------------------------------|-----------------------|
| Identification code               | s2685                                                         |                       |
| Empirical formula                 | C <sub>23</sub> H <sub>23</sub> N <sub>3</sub> O <sub>4</sub> |                       |
| Formula weight                    | 405.44                                                        |                       |
| Temperature                       | 100(2) K                                                      |                       |
| Wavelength                        | 0.71073 Å                                                     |                       |
| Crystal system                    | Orthorhombic                                                  |                       |
| Space group                       | Pbca                                                          |                       |
| Unit cell dimensions              | a = 15.0761(19) Å                                             | $\alpha = 90^\circ$ . |
|                                   | b = 10.7200(13) Å                                             | $\beta = 90^\circ$ .  |
|                                   | c = 23.726(3) Å                                               | $\gamma = 90^\circ$ . |
| Volume                            | 3834.5(8) Å <sup>3</sup>                                      |                       |
| Z                                 | 8                                                             |                       |
| Density (calculated)              | 1.405 Mg/m <sup>3</sup>                                       |                       |
| Absorption coefficient            | 0.098 mm <sup>-1</sup>                                        |                       |
| F(000)                            | 1712                                                          |                       |
| Crystal size                      | 0.45 x 0.40 x 0.05 mm <sup>3</sup>                            |                       |
| Theta range for data collection   | 1.72 to 26.46°.                                               |                       |
| Index ranges                      | -18 ≤ h ≤ 18, -13 ≤ k ≤ 13, -29 ≤ l ≤ 29                      |                       |
| Reflections collected             | 28298                                                         |                       |
| Independent reflections           | 3950 [R(int) = 0.0832]                                        |                       |
| Completeness to theta = 26.46°    | 99.9 %                                                        |                       |
| Absorption correction             | None                                                          |                       |
| Refinement method                 | Full-matrix least-squares on F <sup>2</sup>                   |                       |
| Data / restraints / parameters    | 3950 / 0 / 272                                                |                       |
| Goodness-of-fit on F <sup>2</sup> | 0.891                                                         |                       |
| Final R indices [I > 2σ(I)]       | R1 = 0.0416, wR2 = 0.0930                                     |                       |
| R indices (all data)              | R1 = 0.0718, wR2 = 0.1026                                     |                       |
| Largest diff. peak and hole       | 0.217 and -0.277 e.Å <sup>-3</sup>                            |                       |

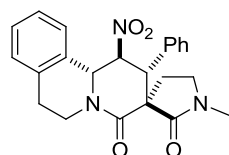

(±)-2a''

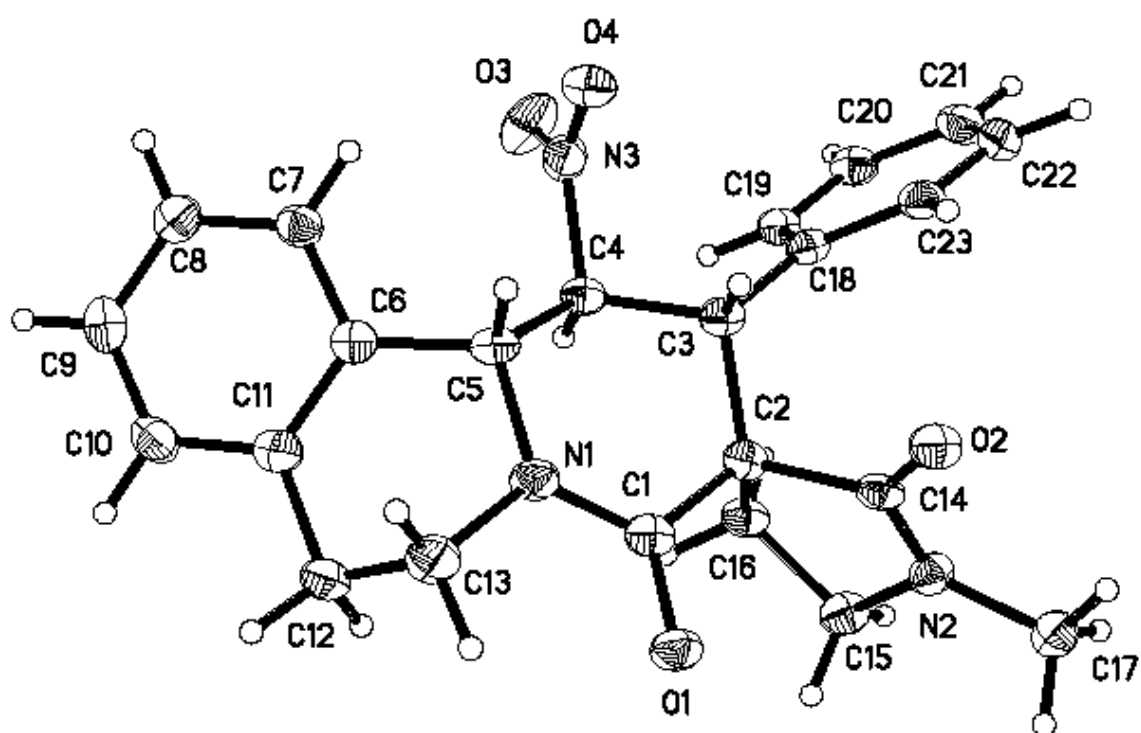

### 3.2.5. X-ray crystal structure of compound ( $\pm$ )-2m'

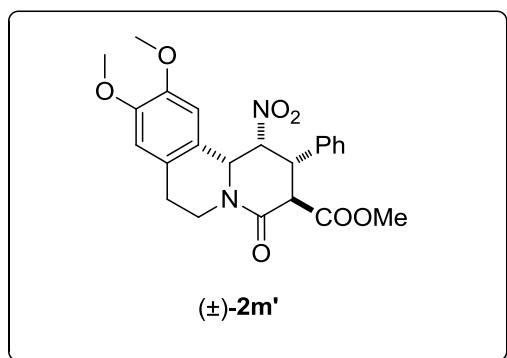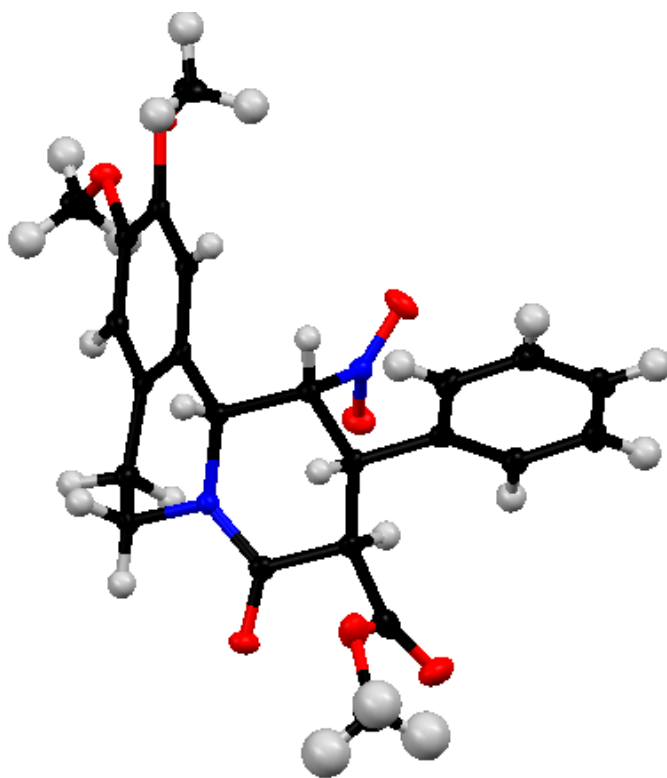

### 3.2.6. X-ray crystal structure of compound ( $\pm$ )-11c

#### Crystal data and structure refinement for 11c.

Identification code 6105

#### Crystal data

|                                 |                                                         |
|---------------------------------|---------------------------------------------------------|
| $C_{23}H_{26}N_2O$              | $F(000) = 744$                                          |
| $M_r = 346.47$                  | $D_x = 1.252 \text{ Mg m}^{-3}$                         |
| Monoclinic, $P2_1/c$            | Melting point: not measured K                           |
| Hall symbol: $-P\ 2ybc$         | Mo $K\alpha$ radiation, $\lambda = 0.71073 \text{ \AA}$ |
| $a = 20.7471 (6) \text{ \AA}$   | Cell parameters from 4193 reflections                   |
| $b = 7.3739 (2) \text{ \AA}$    | $\theta = 5\text{--}27^\circ$                           |
| $c = 12.0188 (3) \text{ \AA}$   | $\mu = 0.08 \text{ mm}^{-1}$                            |
| $\beta = 90.9587 (14)^\circ$    | $T = 150 \text{ K}$                                     |
| $V = 1838.46 (9) \text{ \AA}^3$ | Plate, Clear_pale_colourless                            |
| $Z = 4$                         | $0.18 \times 0.18 \times 0.06 \text{ mm}$               |

#### Data collection

|                                                   |                                                                        |
|---------------------------------------------------|------------------------------------------------------------------------|
| Area                                              | 2739 reflections with $I > 2.0\sigma(I)$                               |
| diffractometer                                    |                                                                        |
| graphite                                          | $R_{\text{int}} = 0.058$                                               |
| $\omega$ scans                                    | $\theta_{\text{max}} = 27.5^\circ$ , $\theta_{\text{min}} = 5.1^\circ$ |
| Absorption correction: Multi-scan                 |                                                                        |
| <i>DENZO/SCALEPACK</i> (Otwinowski & Minor, 1997) | $h = -26 \rightarrow 26$                                               |
| $T_{\text{min}} = 0.94$ , $T_{\text{max}} = 1.00$ | $k = -7 \rightarrow 9$                                                 |
| 17146 measured reflections                        | $l = -15 \rightarrow 15$                                               |
| 4194 independent reflections                      |                                                                        |

#### Refinement

|                                 |                                                      |
|---------------------------------|------------------------------------------------------|
| $R[F^2 > 2\sigma(F^2)] = 0.050$ | 0 restraints                                         |
| $wR(F^2) = 0.156$               | No H atoms present                                   |
| $S = 0.97$                      | $\Delta\rho_{\text{max}} = 0.44 \text{ e \AA}^{-3}$  |
| 4194 reflections                | $\Delta\rho_{\text{min}} = -0.39 \text{ e \AA}^{-3}$ |
| 235 parameters                  |                                                      |

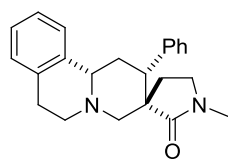

(±)-11c

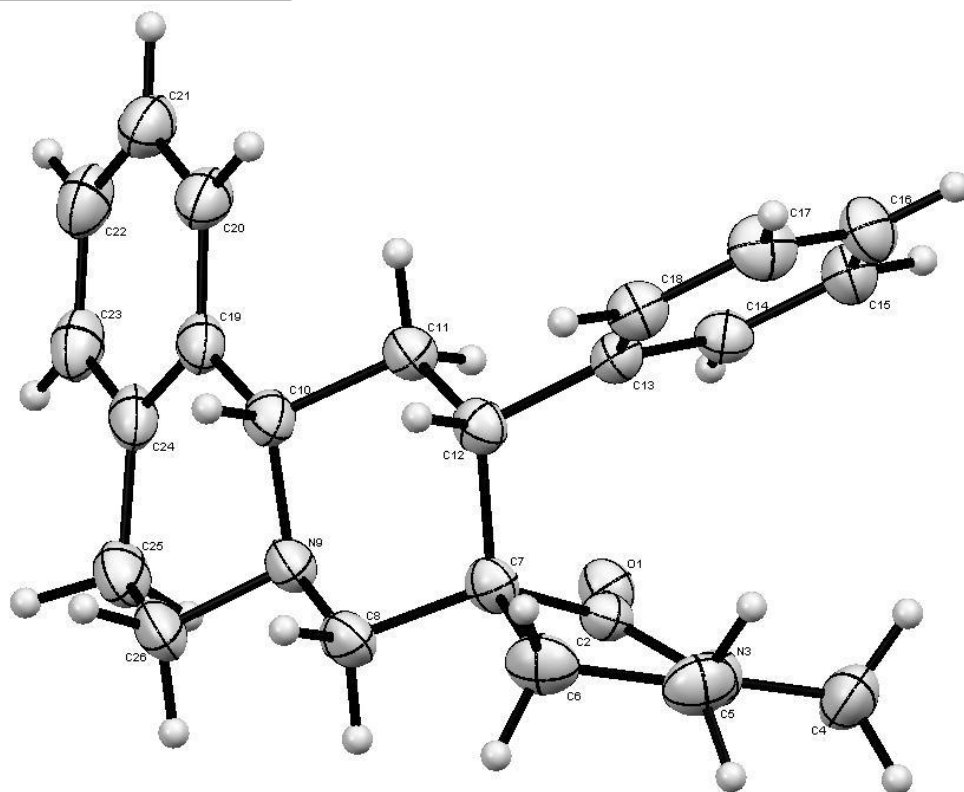



#### 4. References

1. Cosier, J.; Glazer, A. M. *J. Appl. Cryst* **1986**, 19, 105–107.
2. Otwinowski, Z.; Minor, W. *Methods Enzymol.* **1997**, 276, 307–326.
3. Sheldrick, G. M. *Acta Cryst.* **2008**, A64, 112–122.
4. Burla, M. C.; Caliandro, R.; Camalli, M.; Carrozzini, B.; Cascarano, G. L.; De Caro, L.; Giacovazzo, C.; Polidori, G.; Spagna, R. *J. Appl. Cryst.* **2005**, 38, 381–388.
5. Betteridge, P. W.; Carruthers, J. R.; Cooper, R. I.; Prout, K.; Watkin, D. J. *J. Appl. Cryst.* **2003**, 36, 1487.
6. Kyle, A. F.; Jakubec, P.; Cockfield, D. M.; Cleator, E.; Skidmore, J.; Dixon, D. J. *Chem. Commun.* **2011**, 47, 10037–10039.
7. Jakubec, P.; Helliwell, M.; Dixon, D. J. *Org. Lett.* **2008**, 10, 4267–4270.
8. Quesada, M. L.; Schlessinger, R. H. *J. Org. Chem.* **1978**, 43, 346–347.
9. Elliott, M. C.; Williams, E. *Org. Biol. Chem.* **2003**, 1, 3038–3047.
10. E. P. Kohler, H. Engelbrecht, *J. Am. Chem. Soc.* **1919**, 41, 764–770.
11. Jakubec, P.; Kyle, A. F.; Calleja, J.; Dixon, D. J. *Tetrahedron Lett.* **2011**, 52, 6094–6097.
12. Ye, J.; Dixon, D. J.; Hynes, P. S. *Chem. Commun.* **2005**, 4481–4483.
13. Okino, T.; Hoashi, Y.; Takemoto, Y. *J. Am. Chem. Soc.* **2003**, 125, 12672–12673.
14. Watanabe, M.; Ikagawa, A.; Wang, H.; Murata, K.; Ikariya, T. *J. Am. Chem. Soc.* **2004**, 126, 11148–11149.
15. E. P. Kohler, H. Engelbrecht, *J. Am. Chem. Soc.* **1919**, 41, 764–770.
16. A mixture of two major diastereomers **2m/2m'** epimeric at the stereogenic centre bearing the nitro-group (C-5) was observed after 2 hours reaction time (49:51) under the described conditions. After 24 hours, the diastereomeric ratio had changed dramatically (7:93) in the biphasic mixture (suspension). Subsequently the reaction mixture was cooled to room temperature and **2m** and **2m'** were isolated by column chromatography as single diastereomers.

## 5. $^1\text{H}$ and $^{13}\text{C}$ NMR Spectra

### 5.1. $^1\text{H}$ NMR spectra of 6b

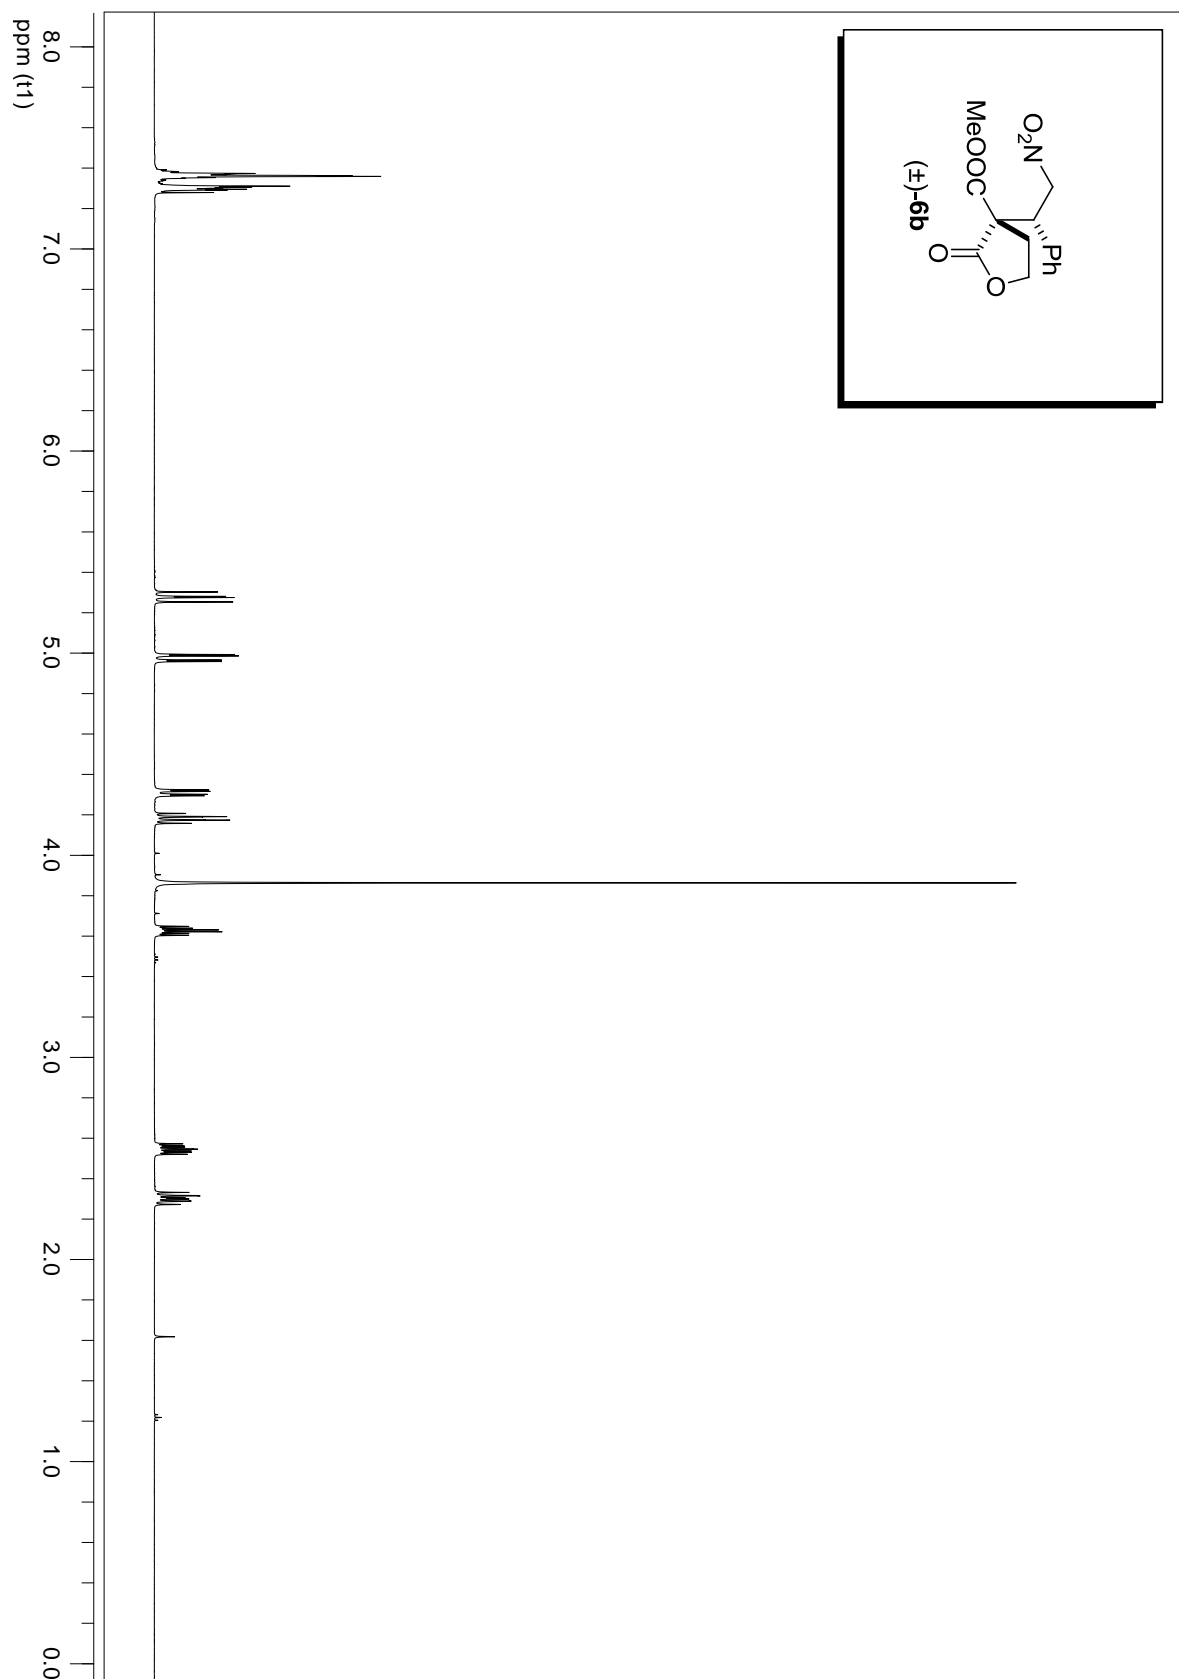

## 5.1. $^{13}\text{C}$ NMR spectra of 6b

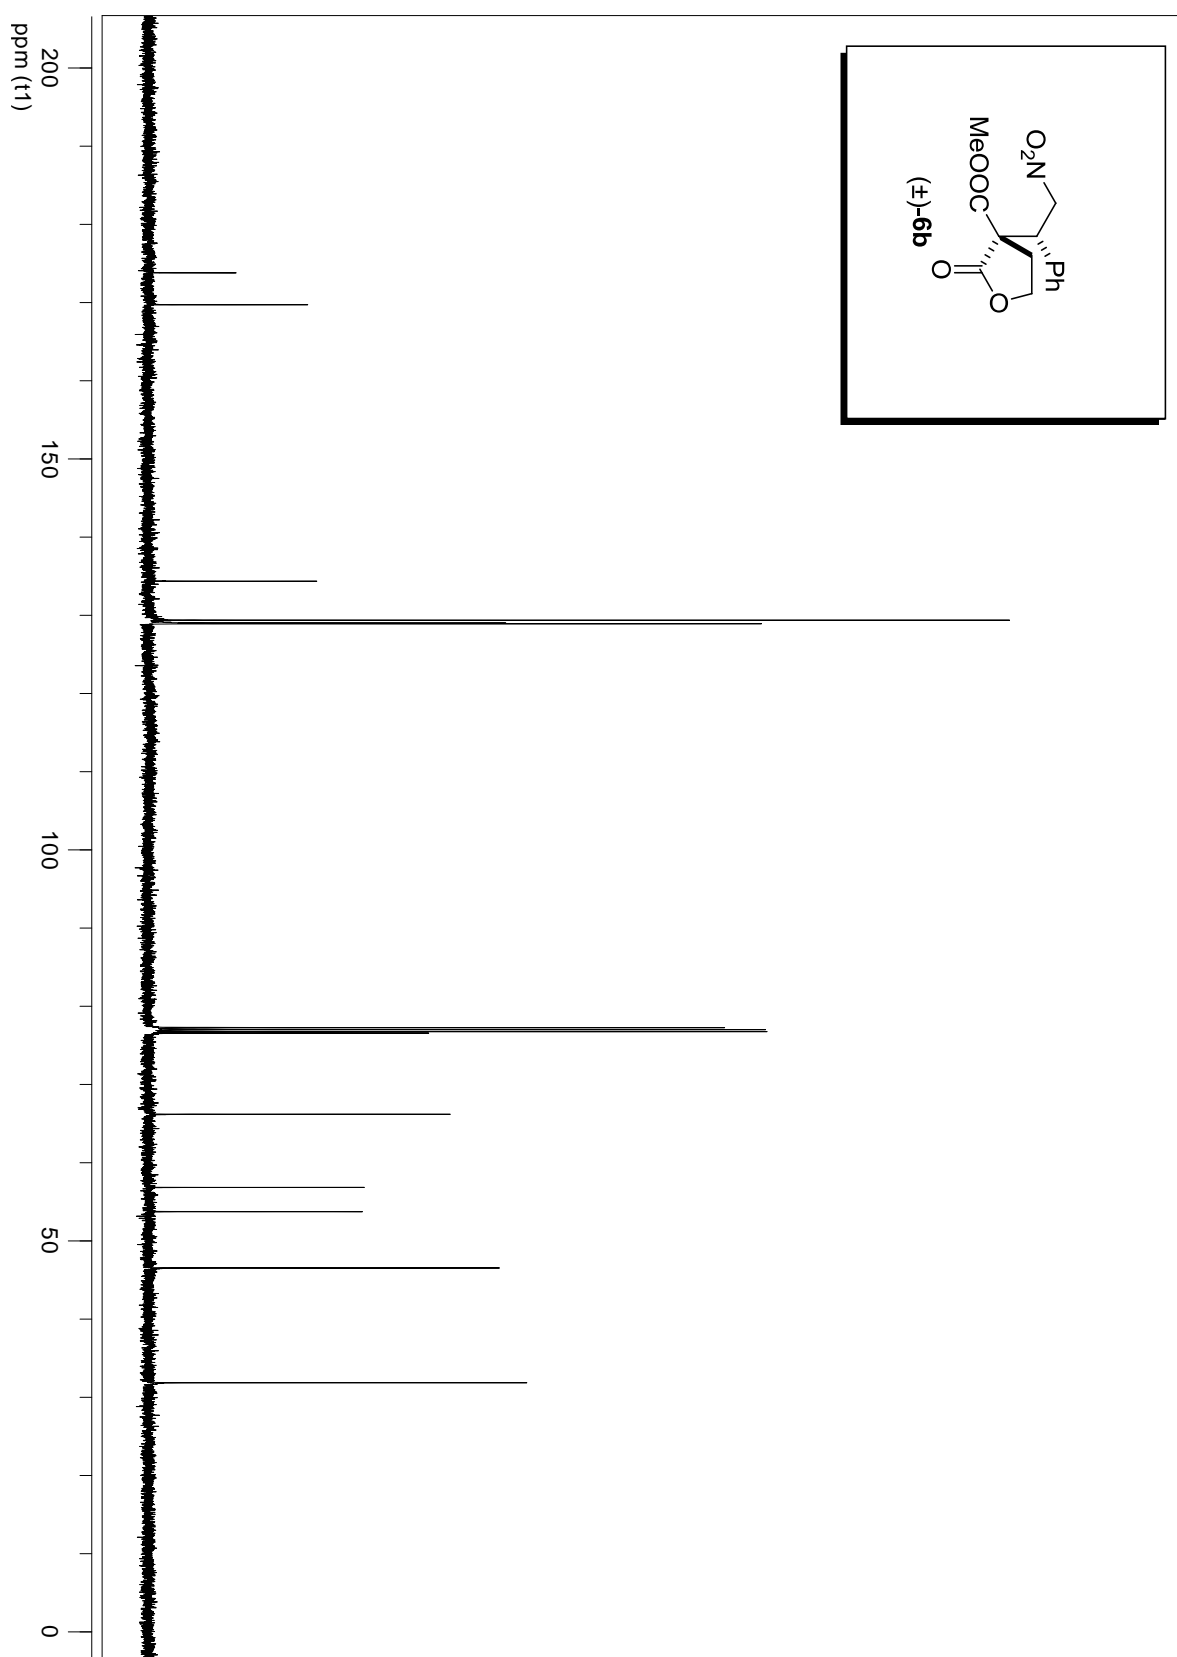

## 5.2. $^1\text{H}$ NMR spectra of 6c

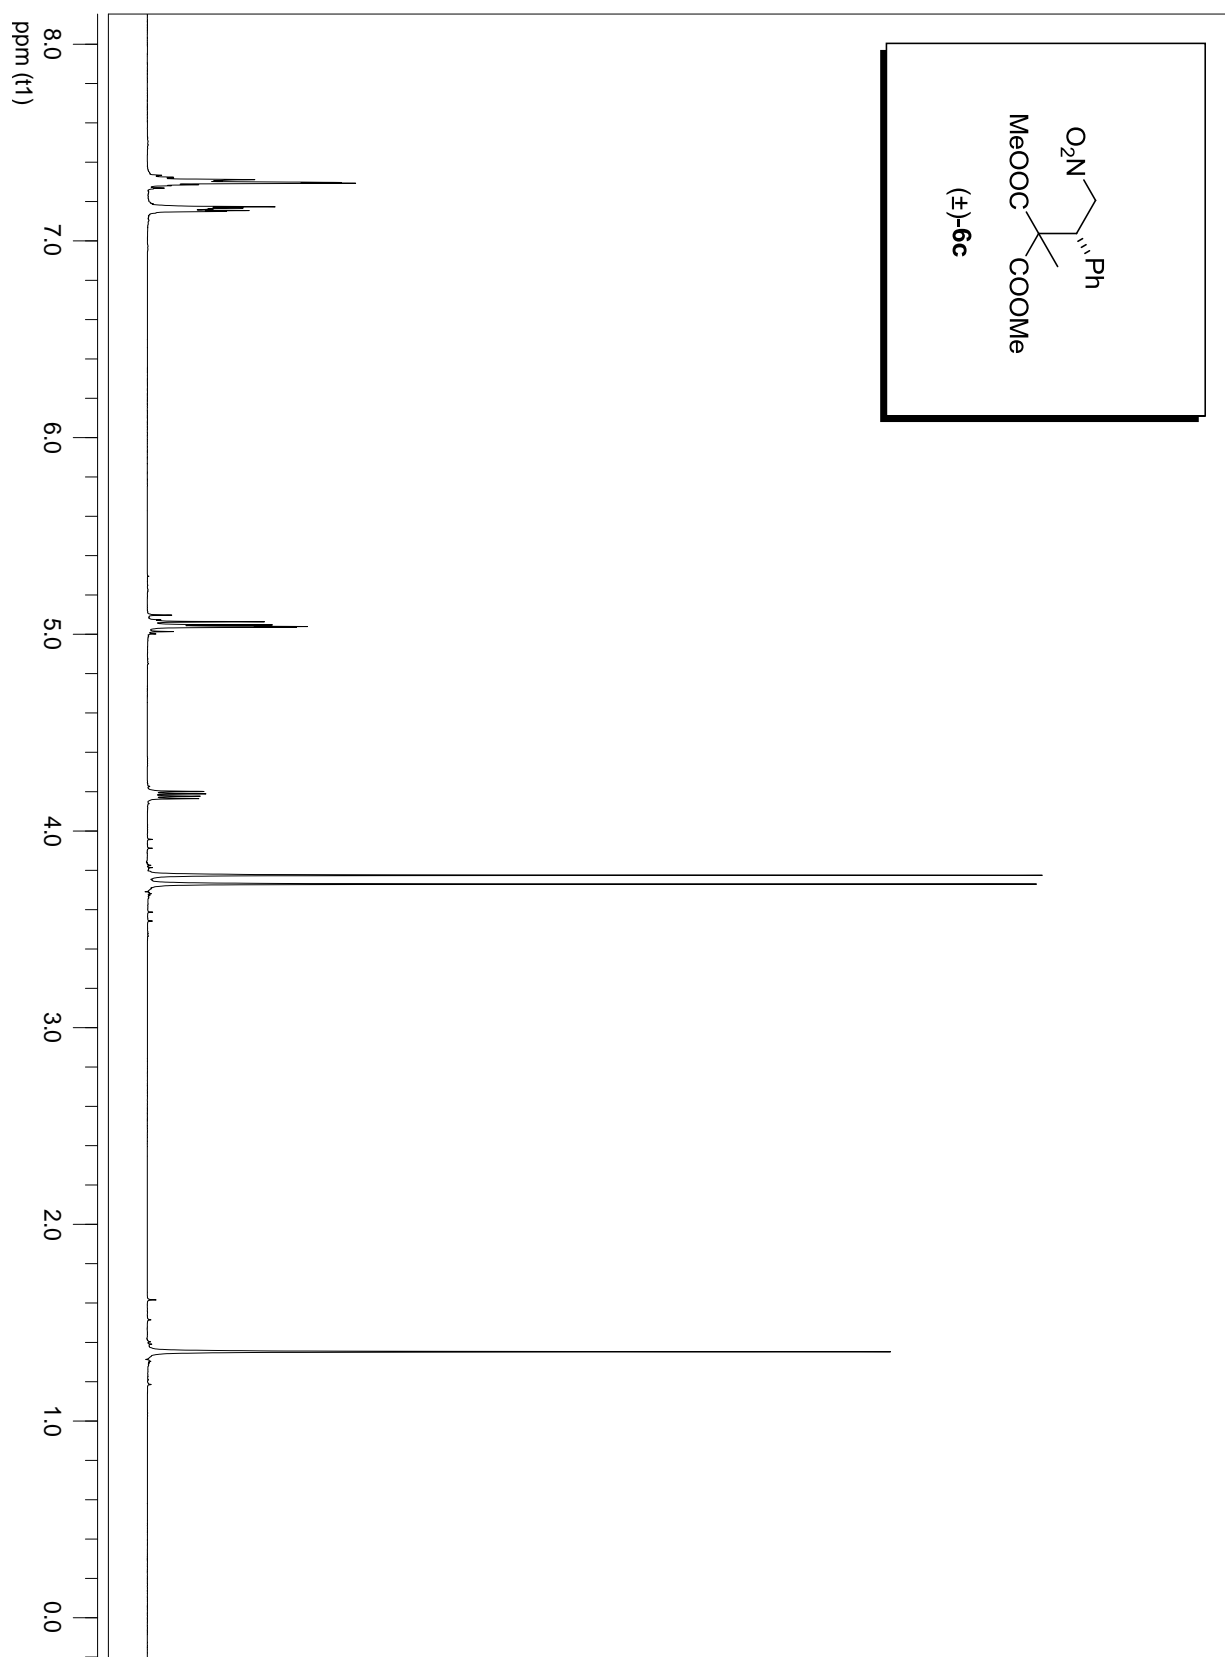

## 5.2. $^{13}\text{C}$ NMR spectra of 6c

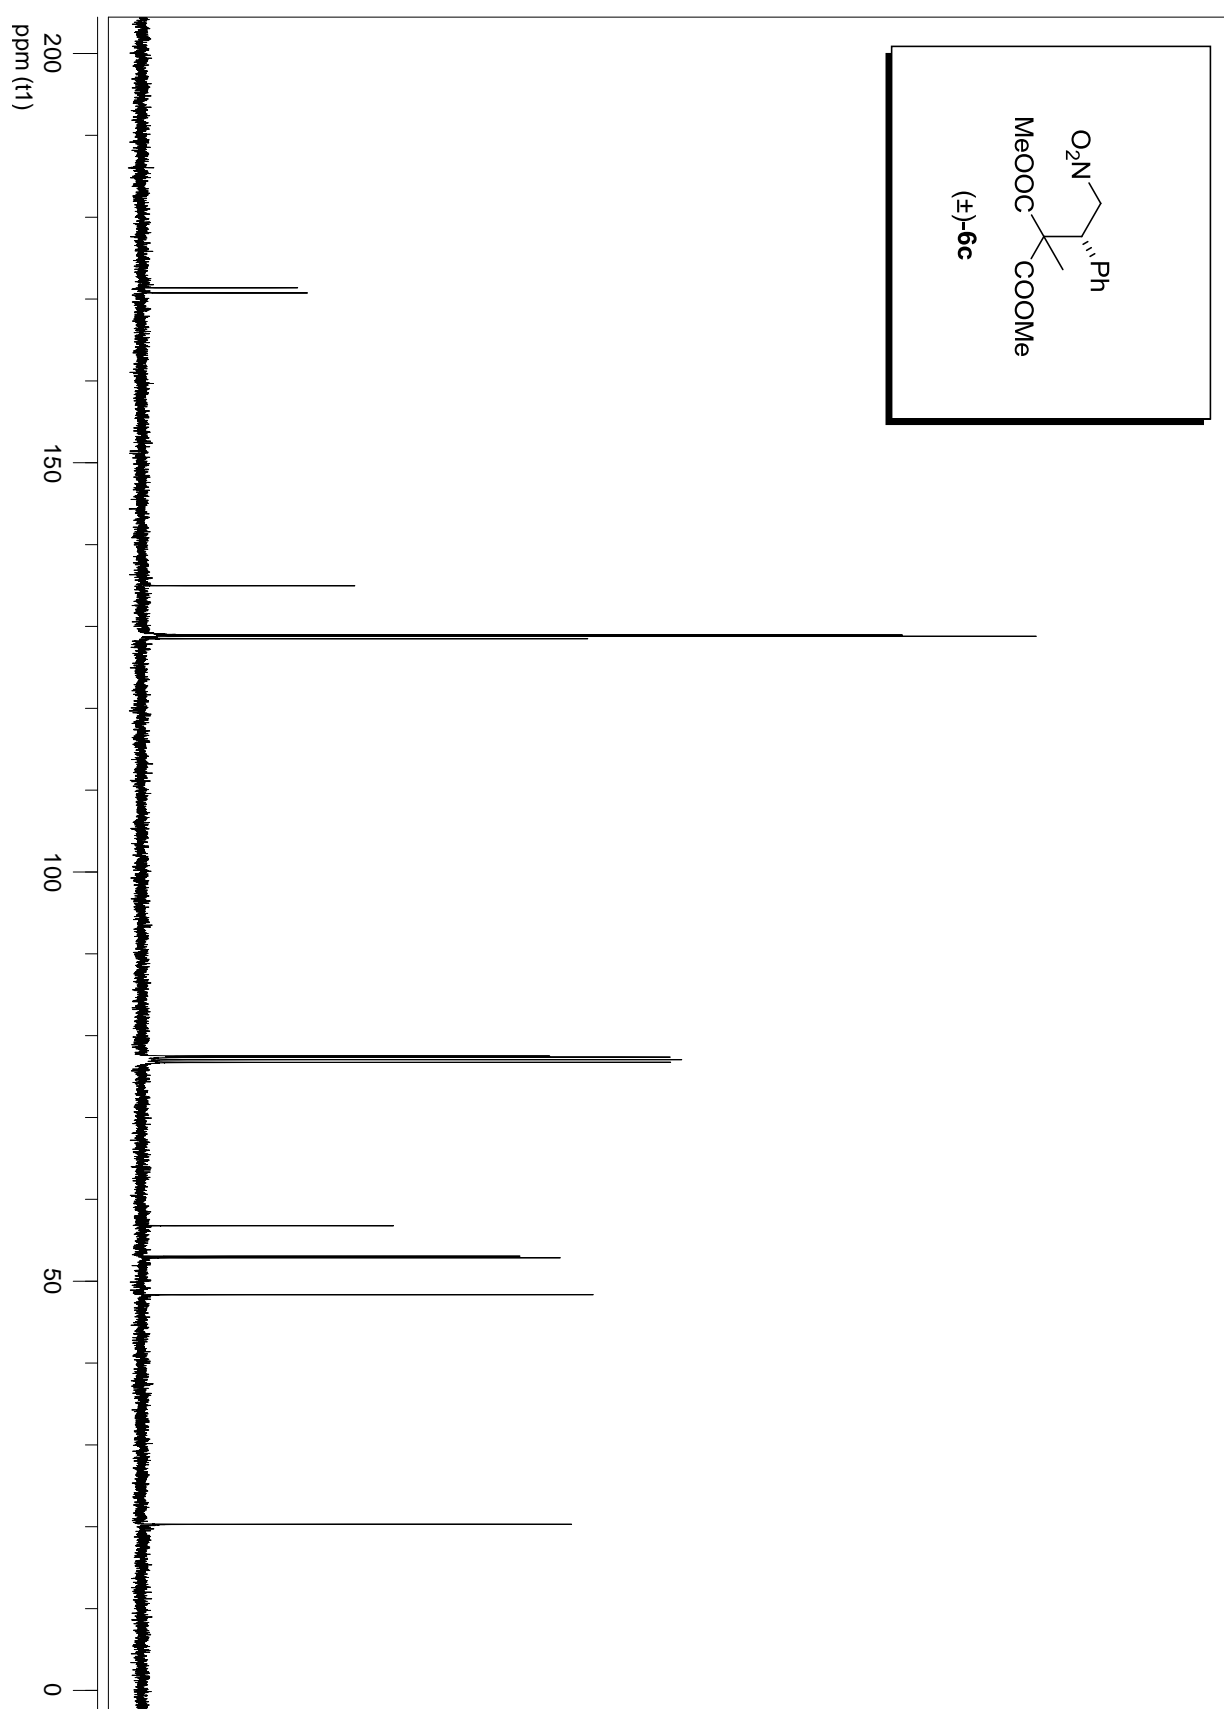

### 5.3. $^1\text{H}$ NMR spectra of 6d

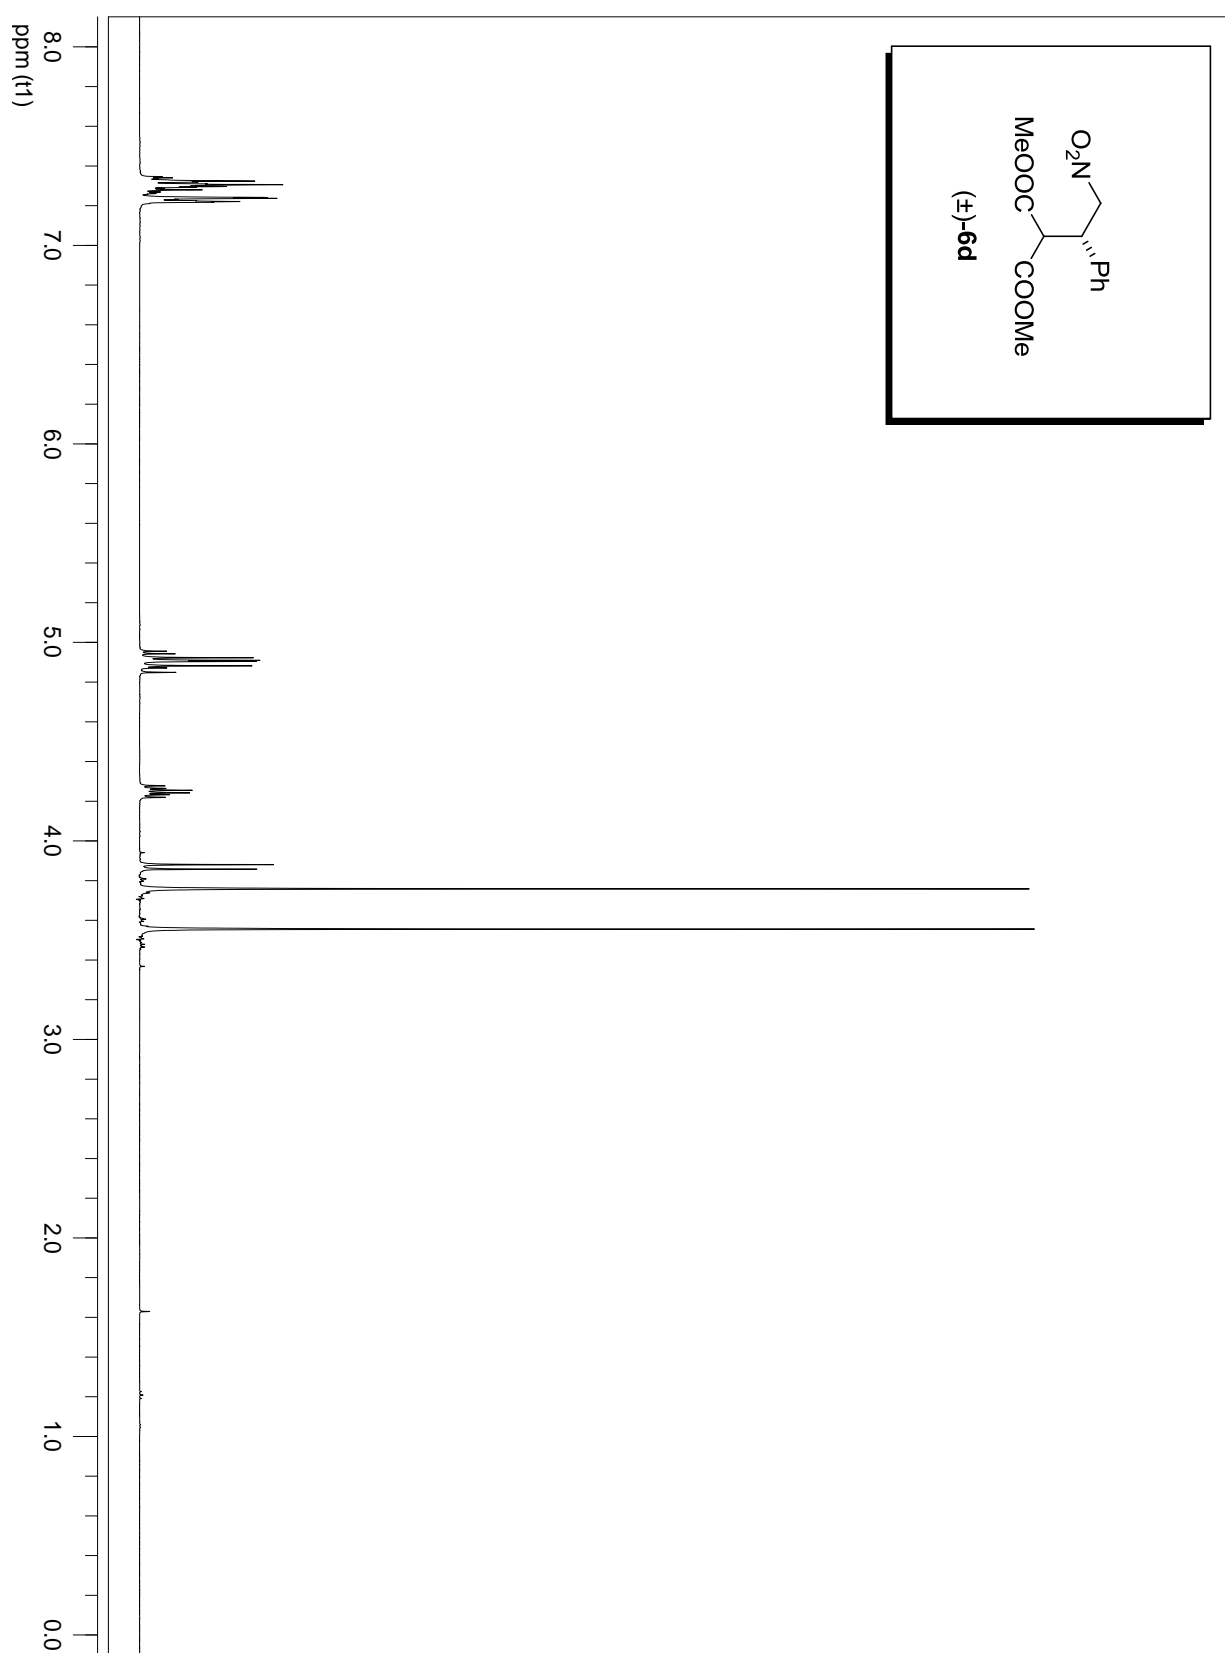

### 5.3. $^{13}\text{C}$ NMR spectra of 6d

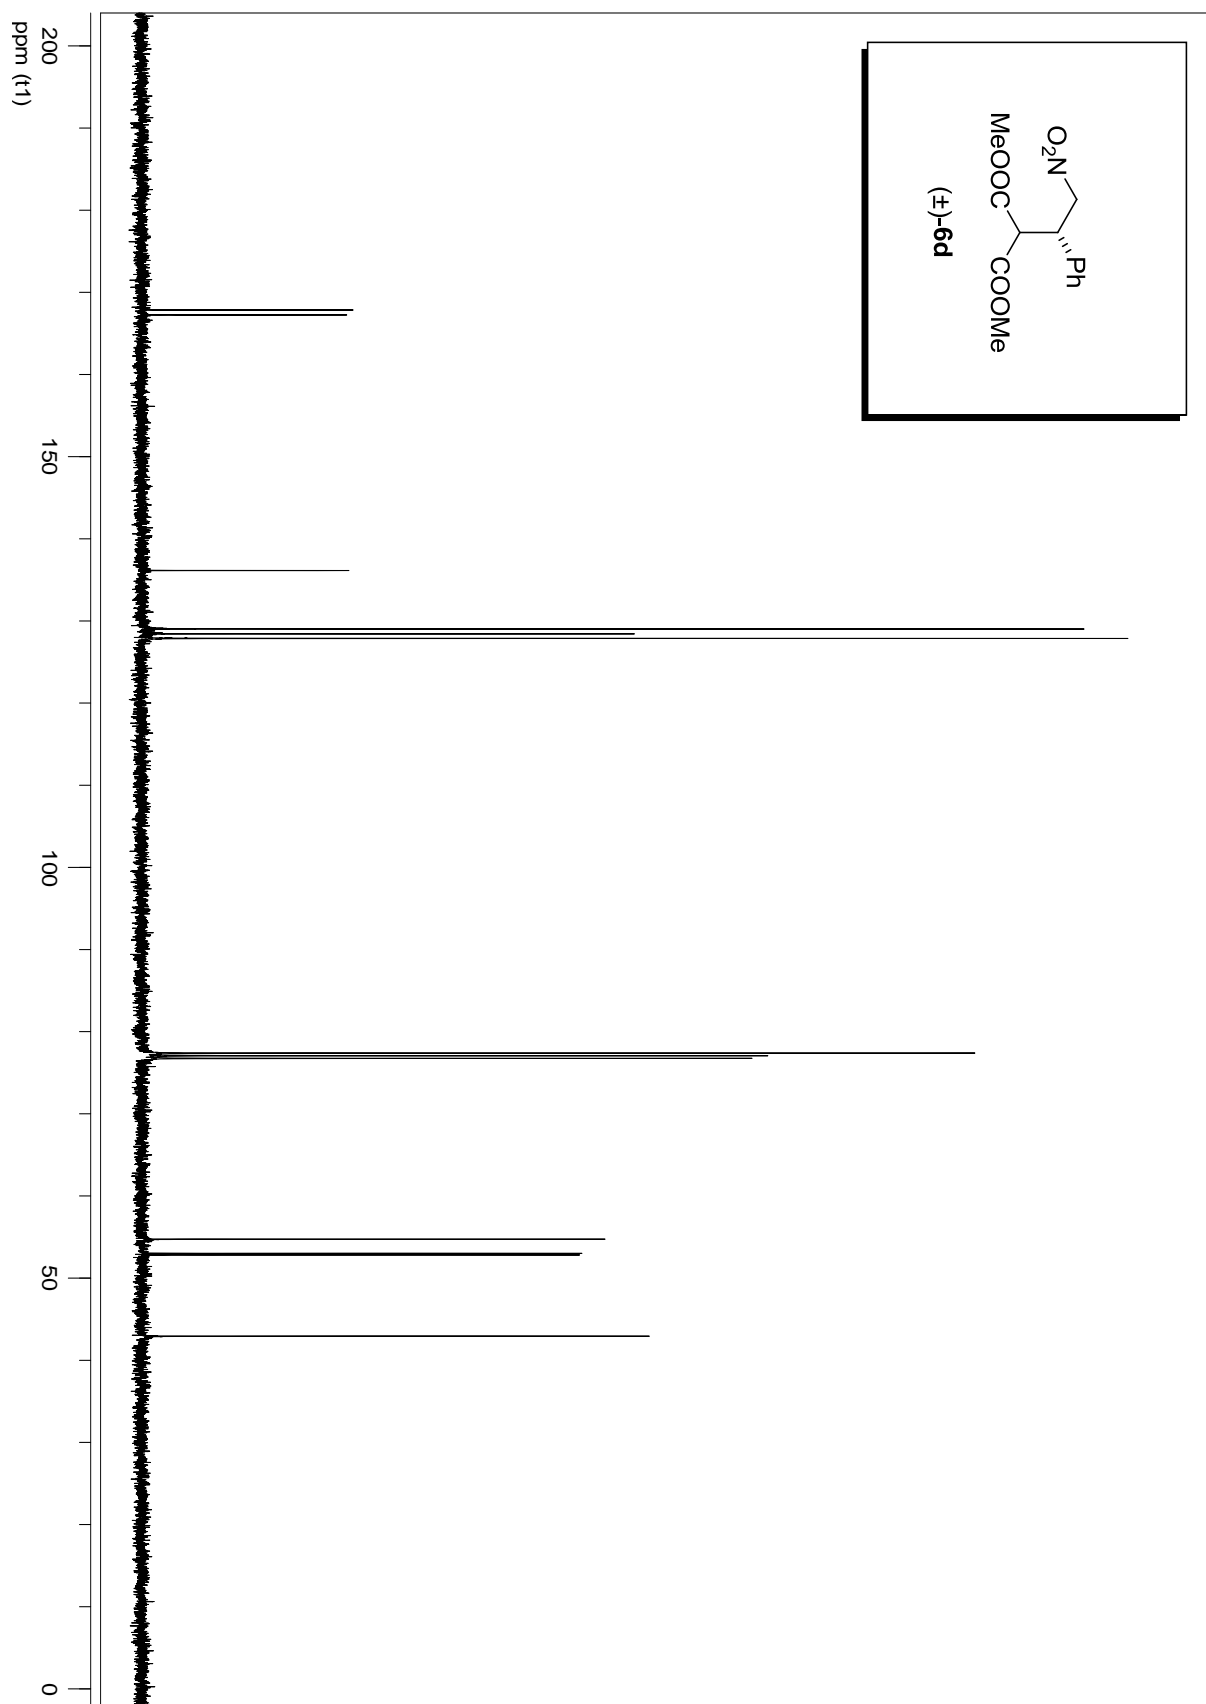

#### 5.4. $^1\text{H}$ NMR spectra of 6e

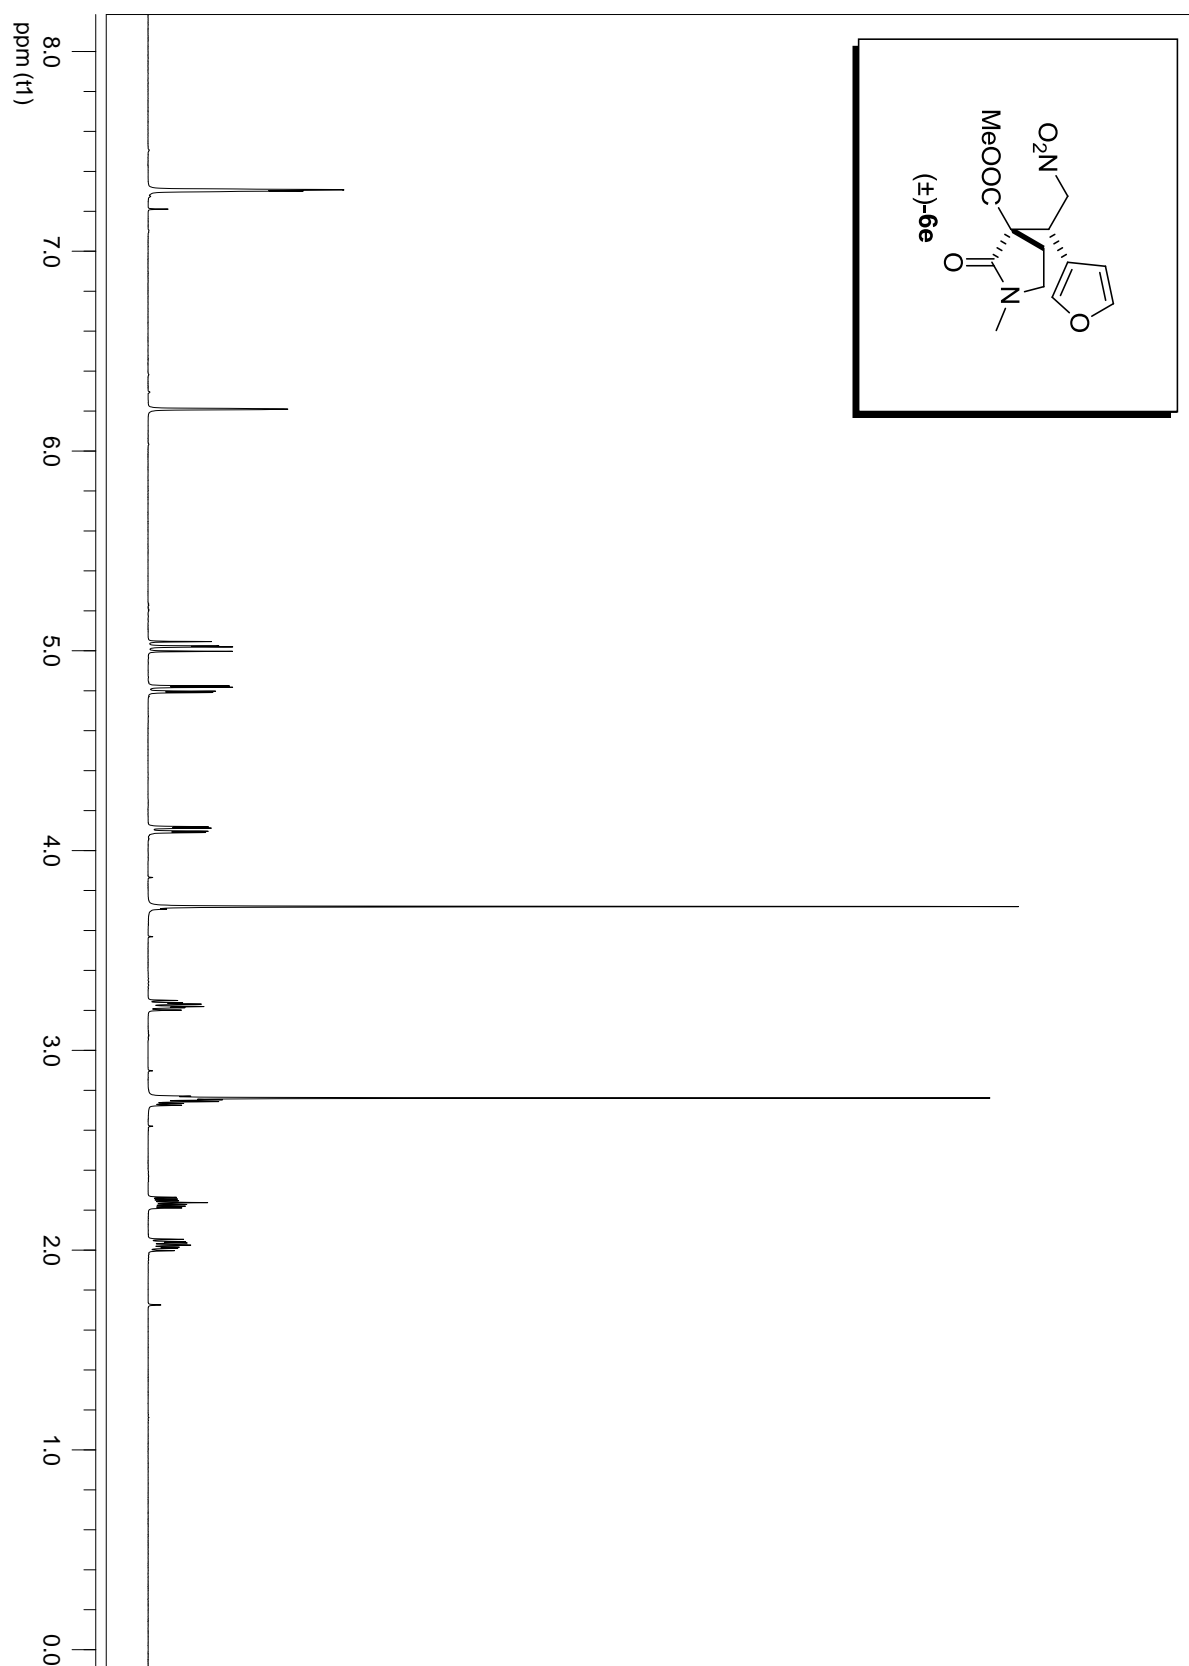



## 5.4. $^{13}\text{C}$ NMR spectra of 6e

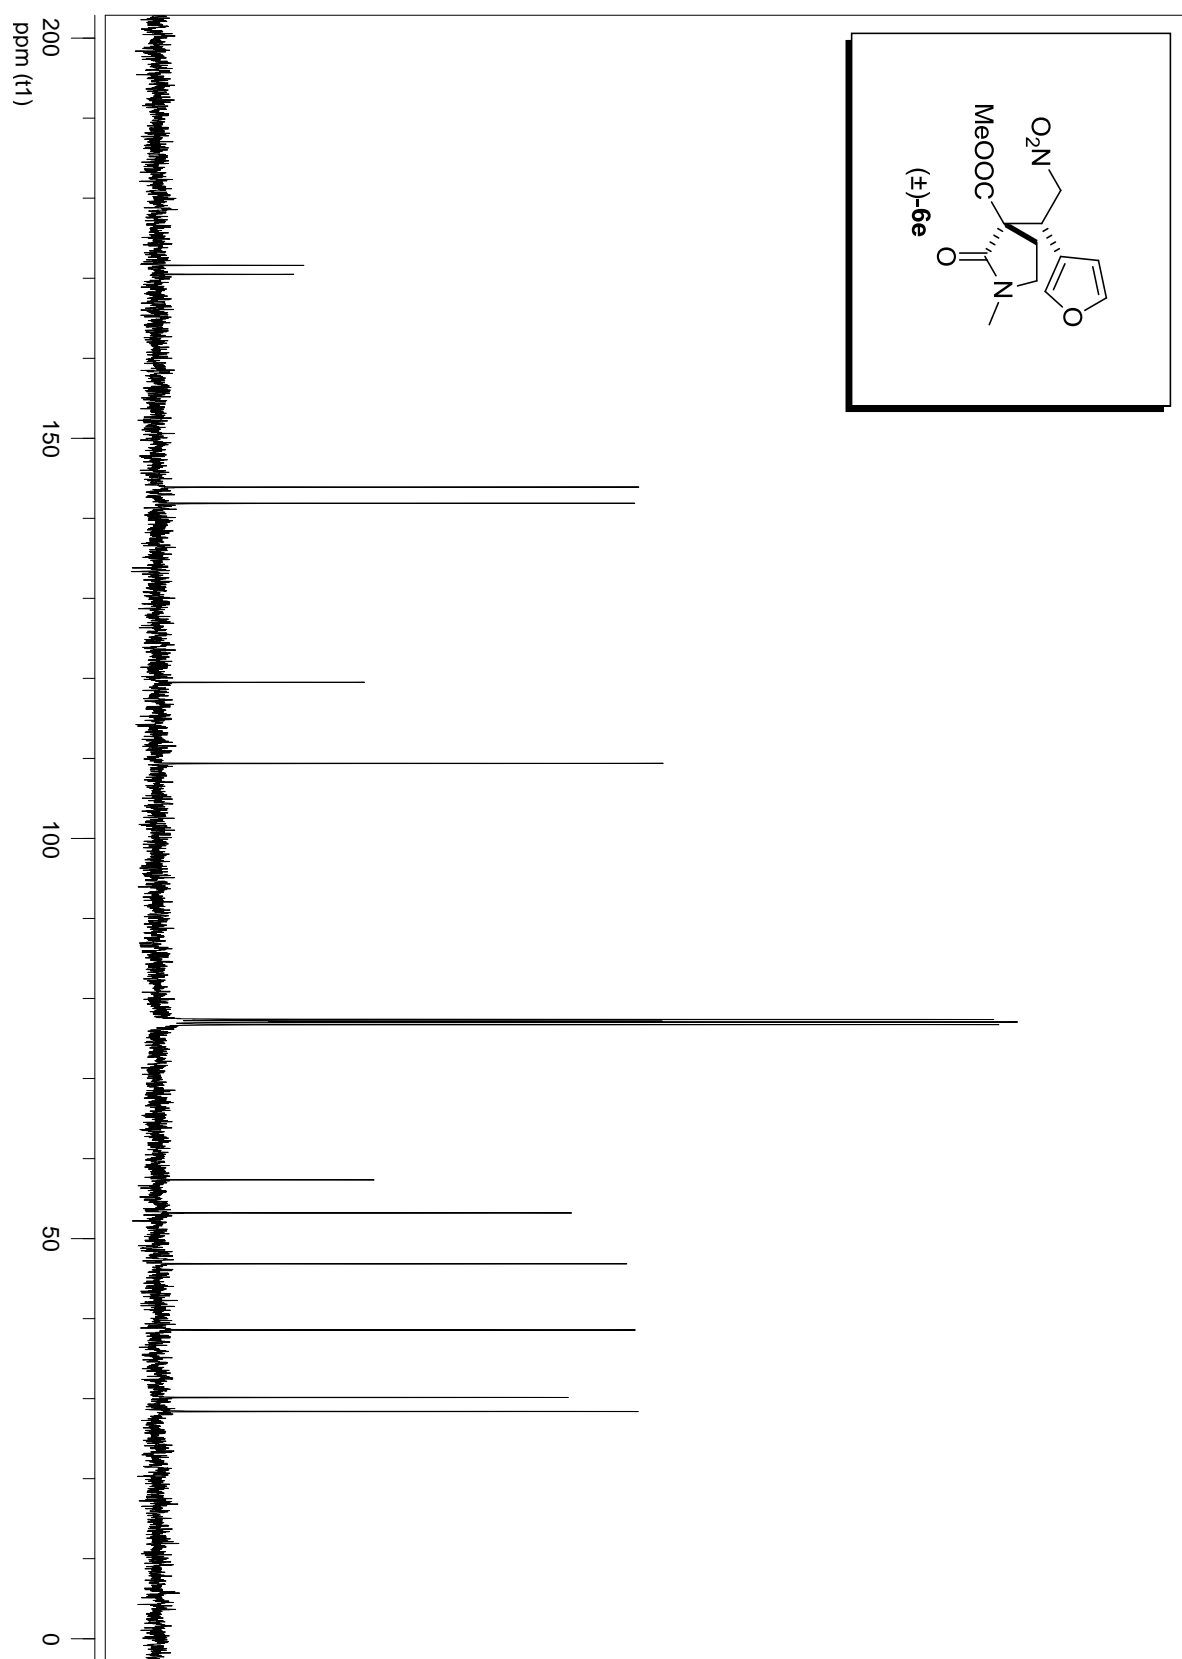

### 5.5. $^1\text{H}$ NMR spectra of 1a

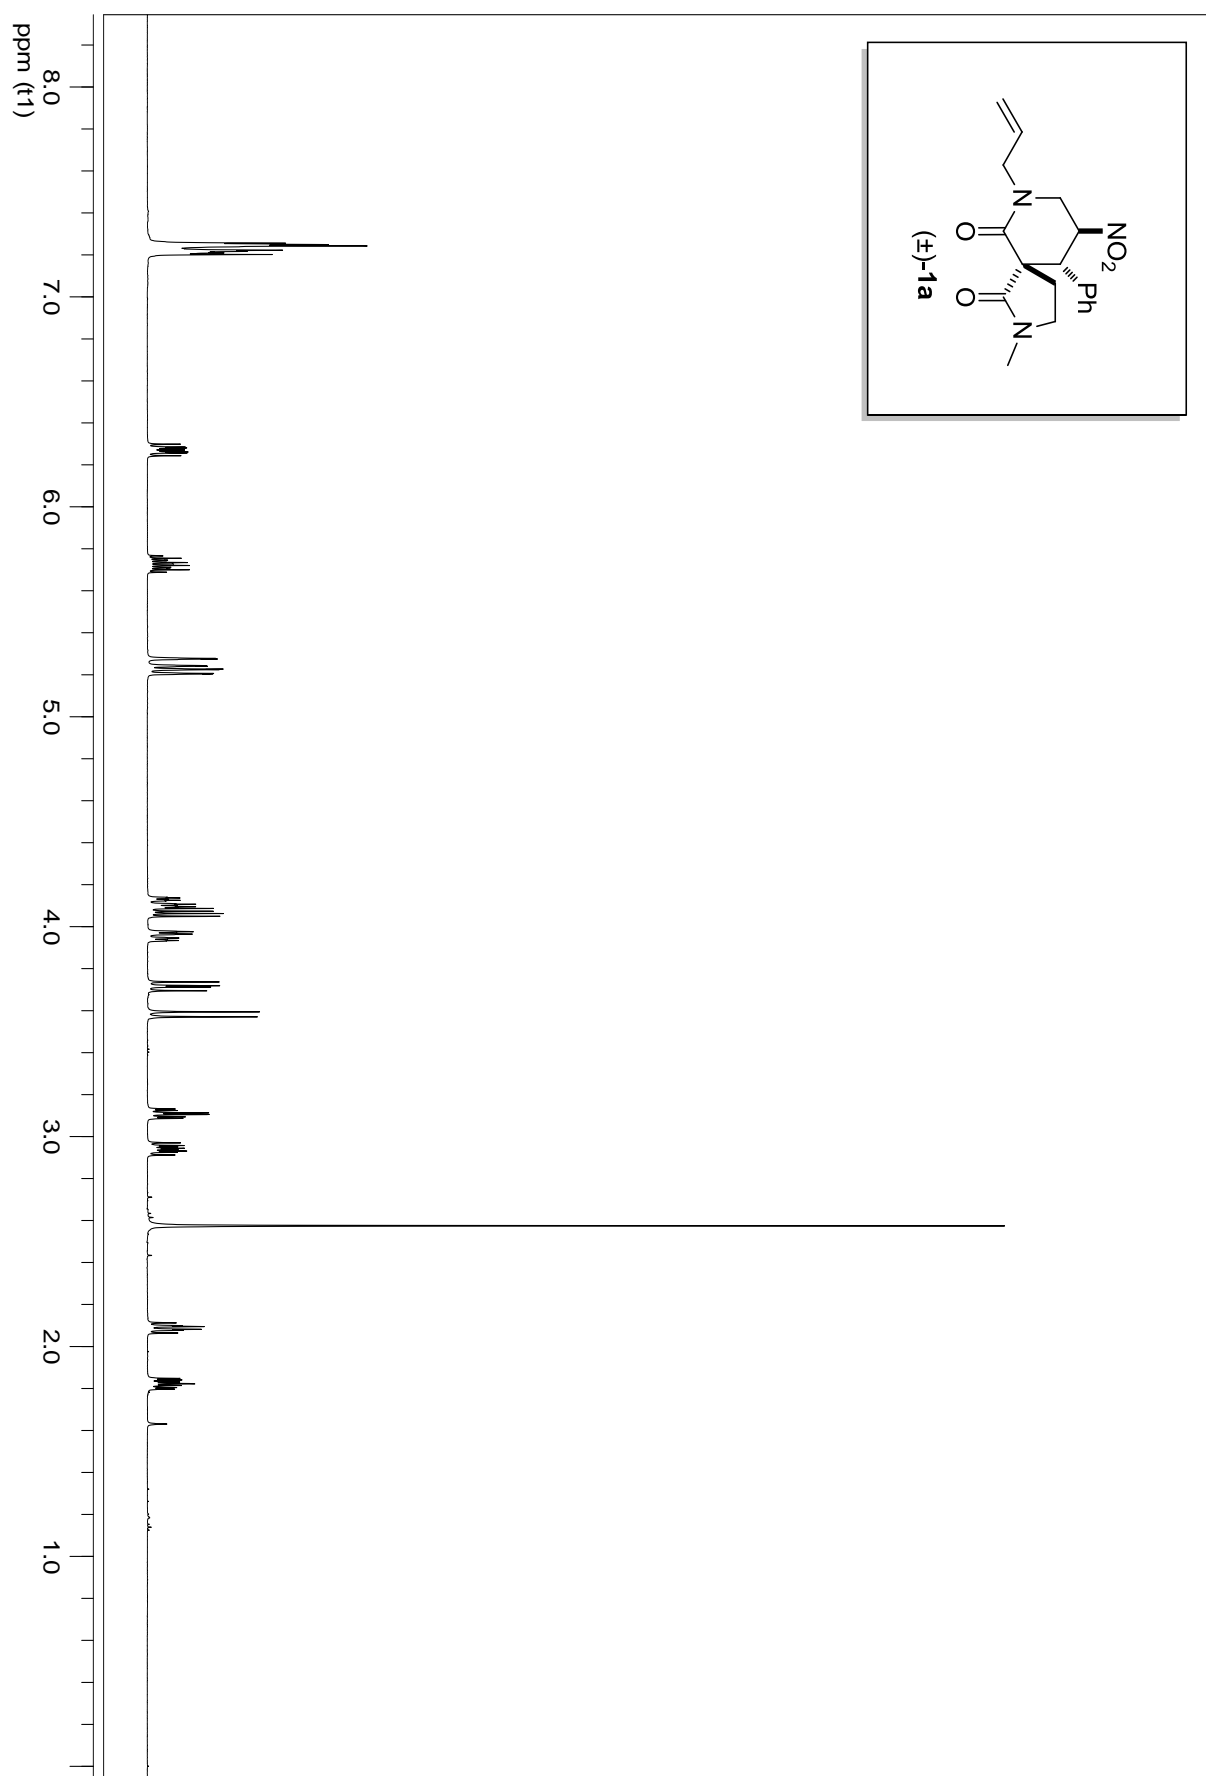

## 5.5. $^{13}\text{C}$ NMR spectra of 1a

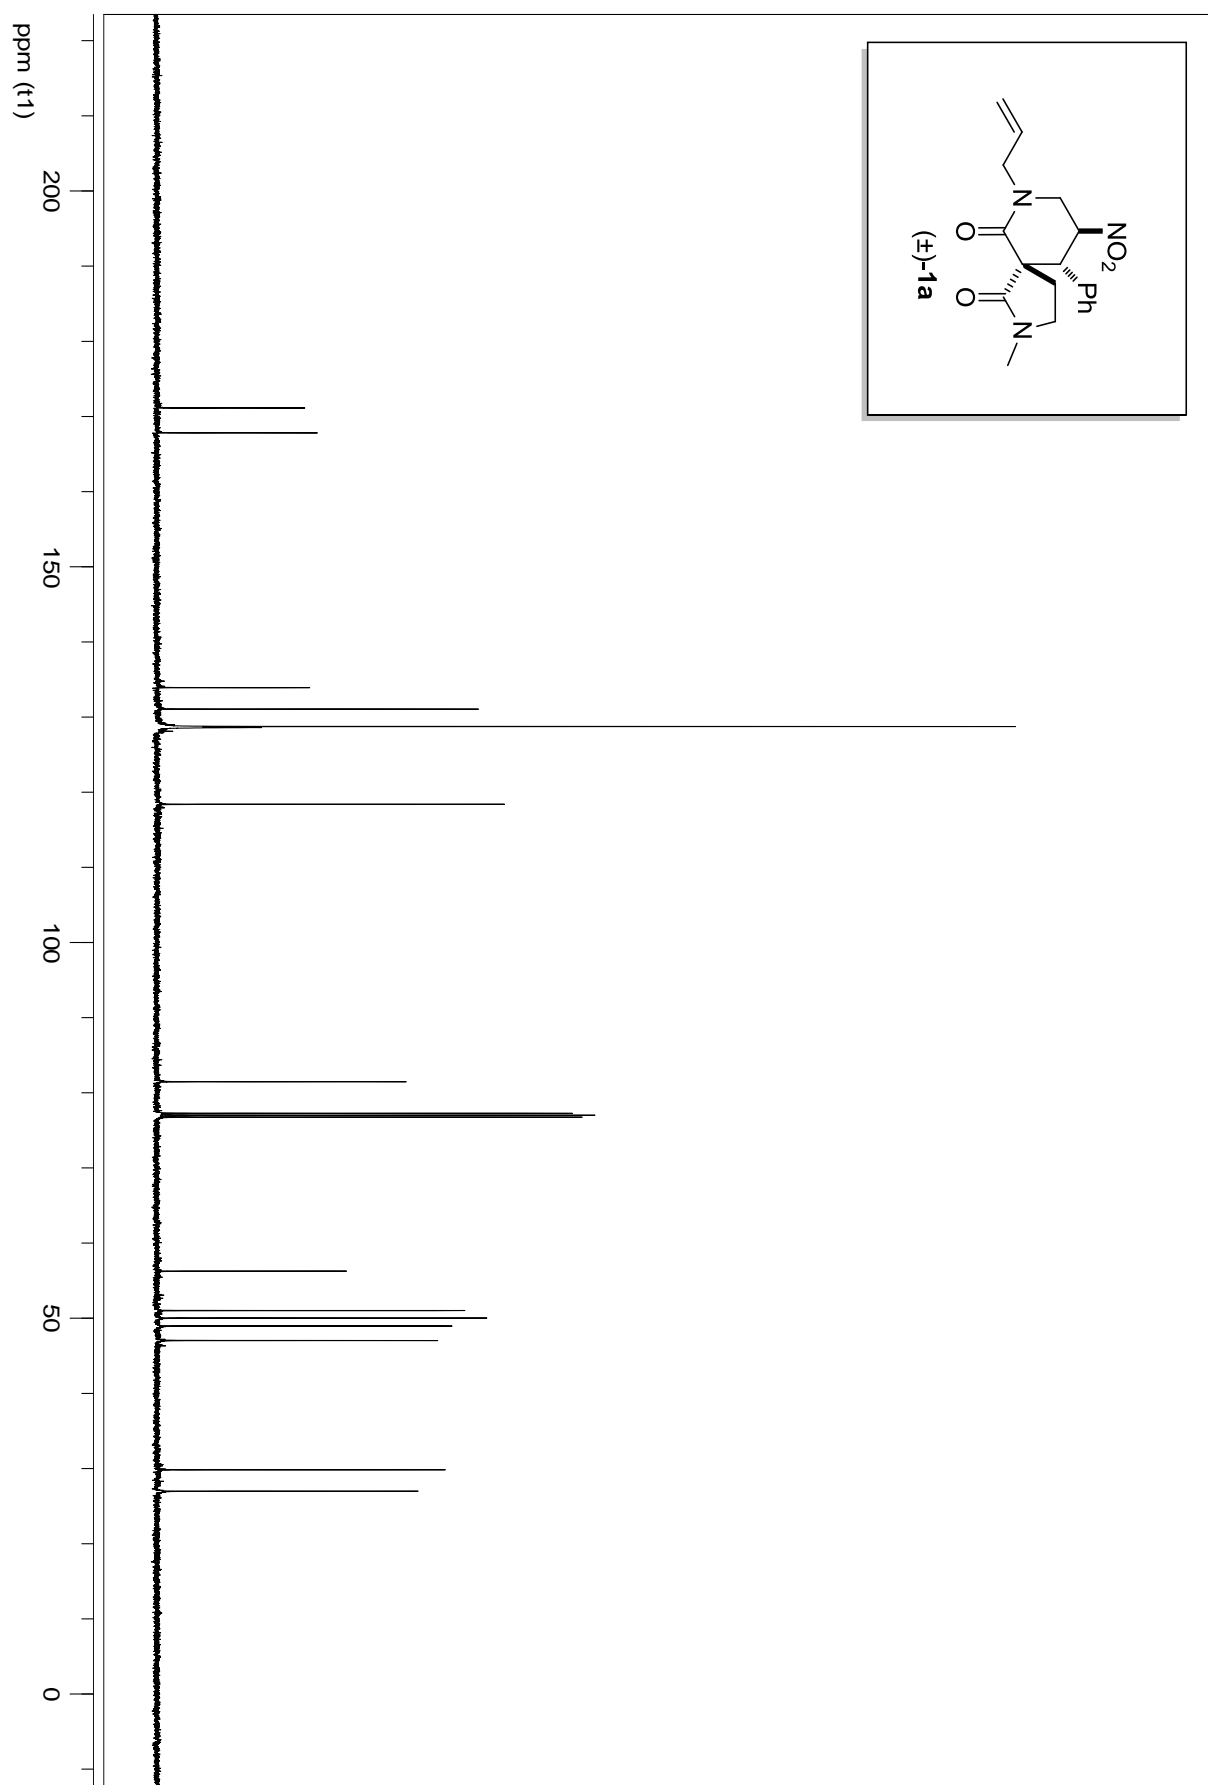

## 5.6. $^1\text{H}$ NMR spectra of 1b

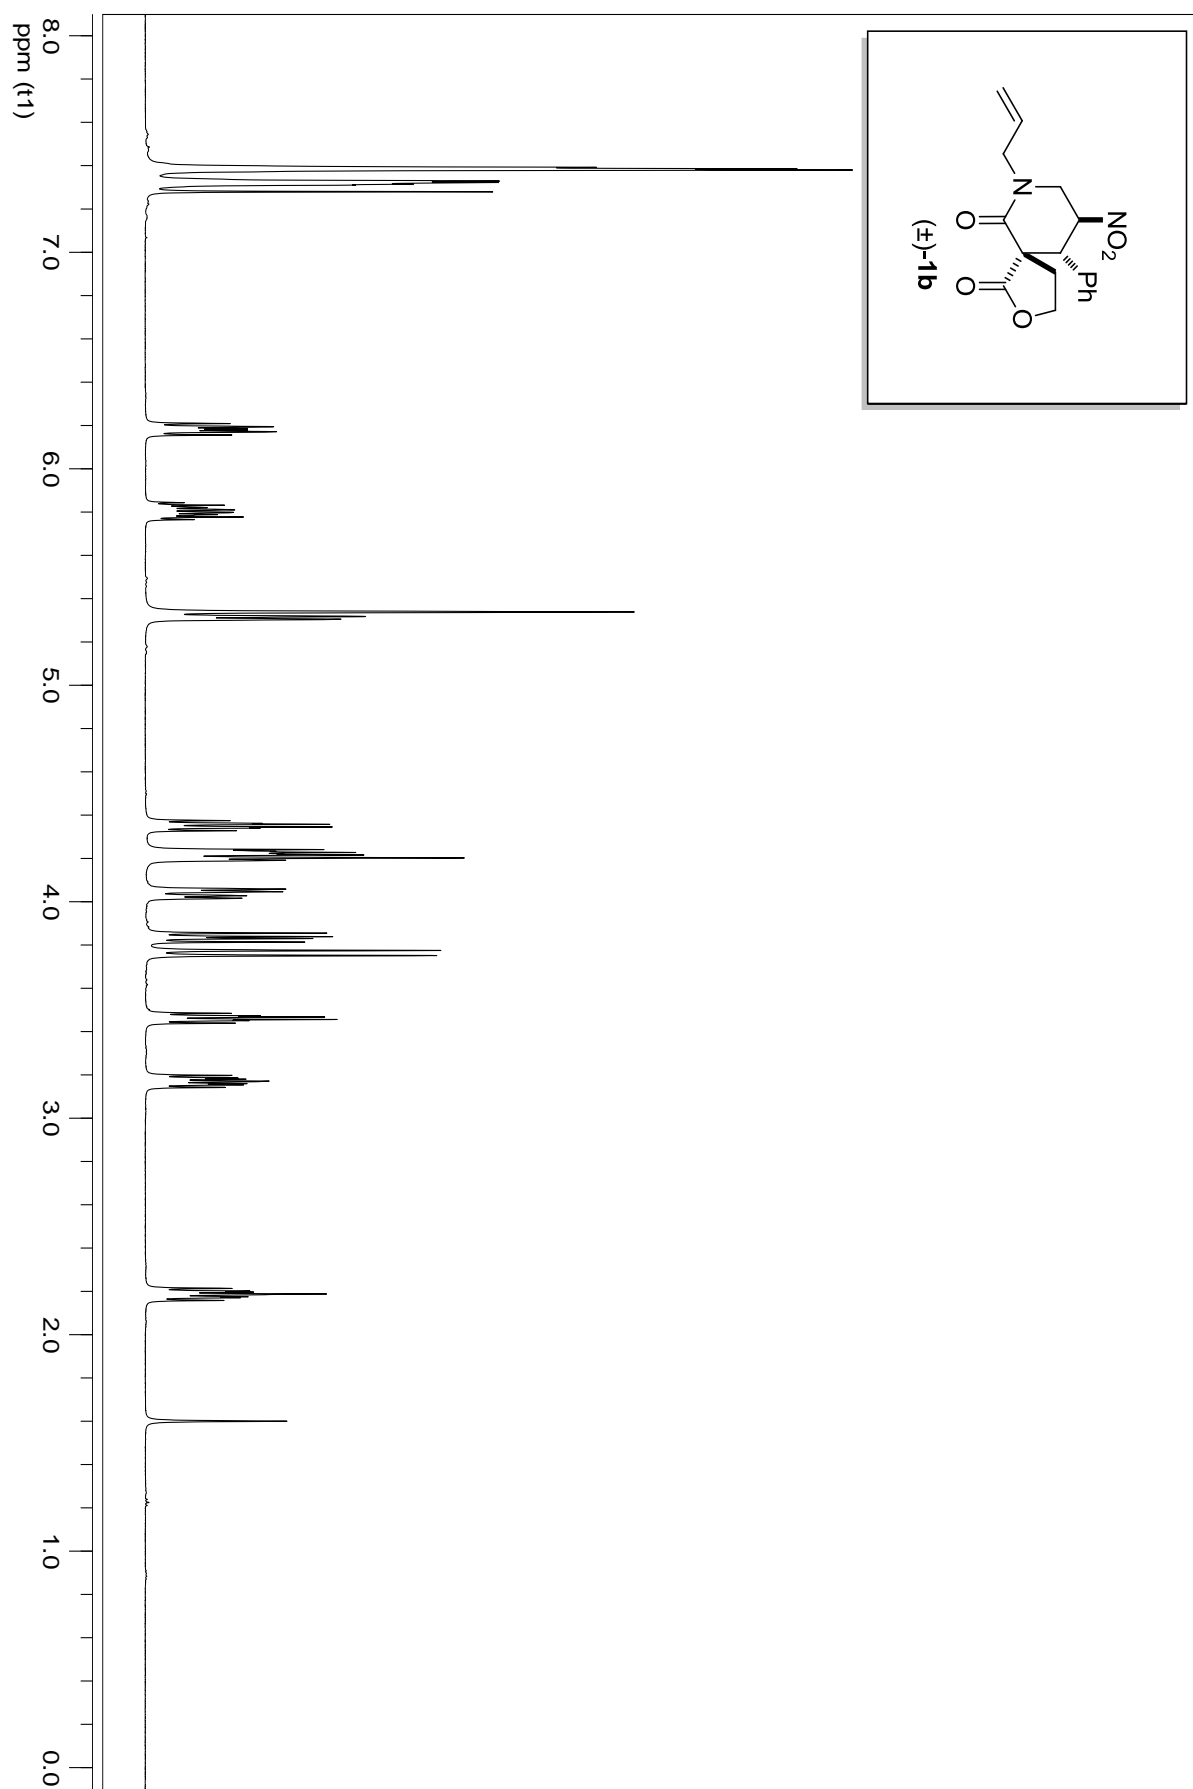

## 5.6. $^{13}\text{C}$ NMR spectra of 1b

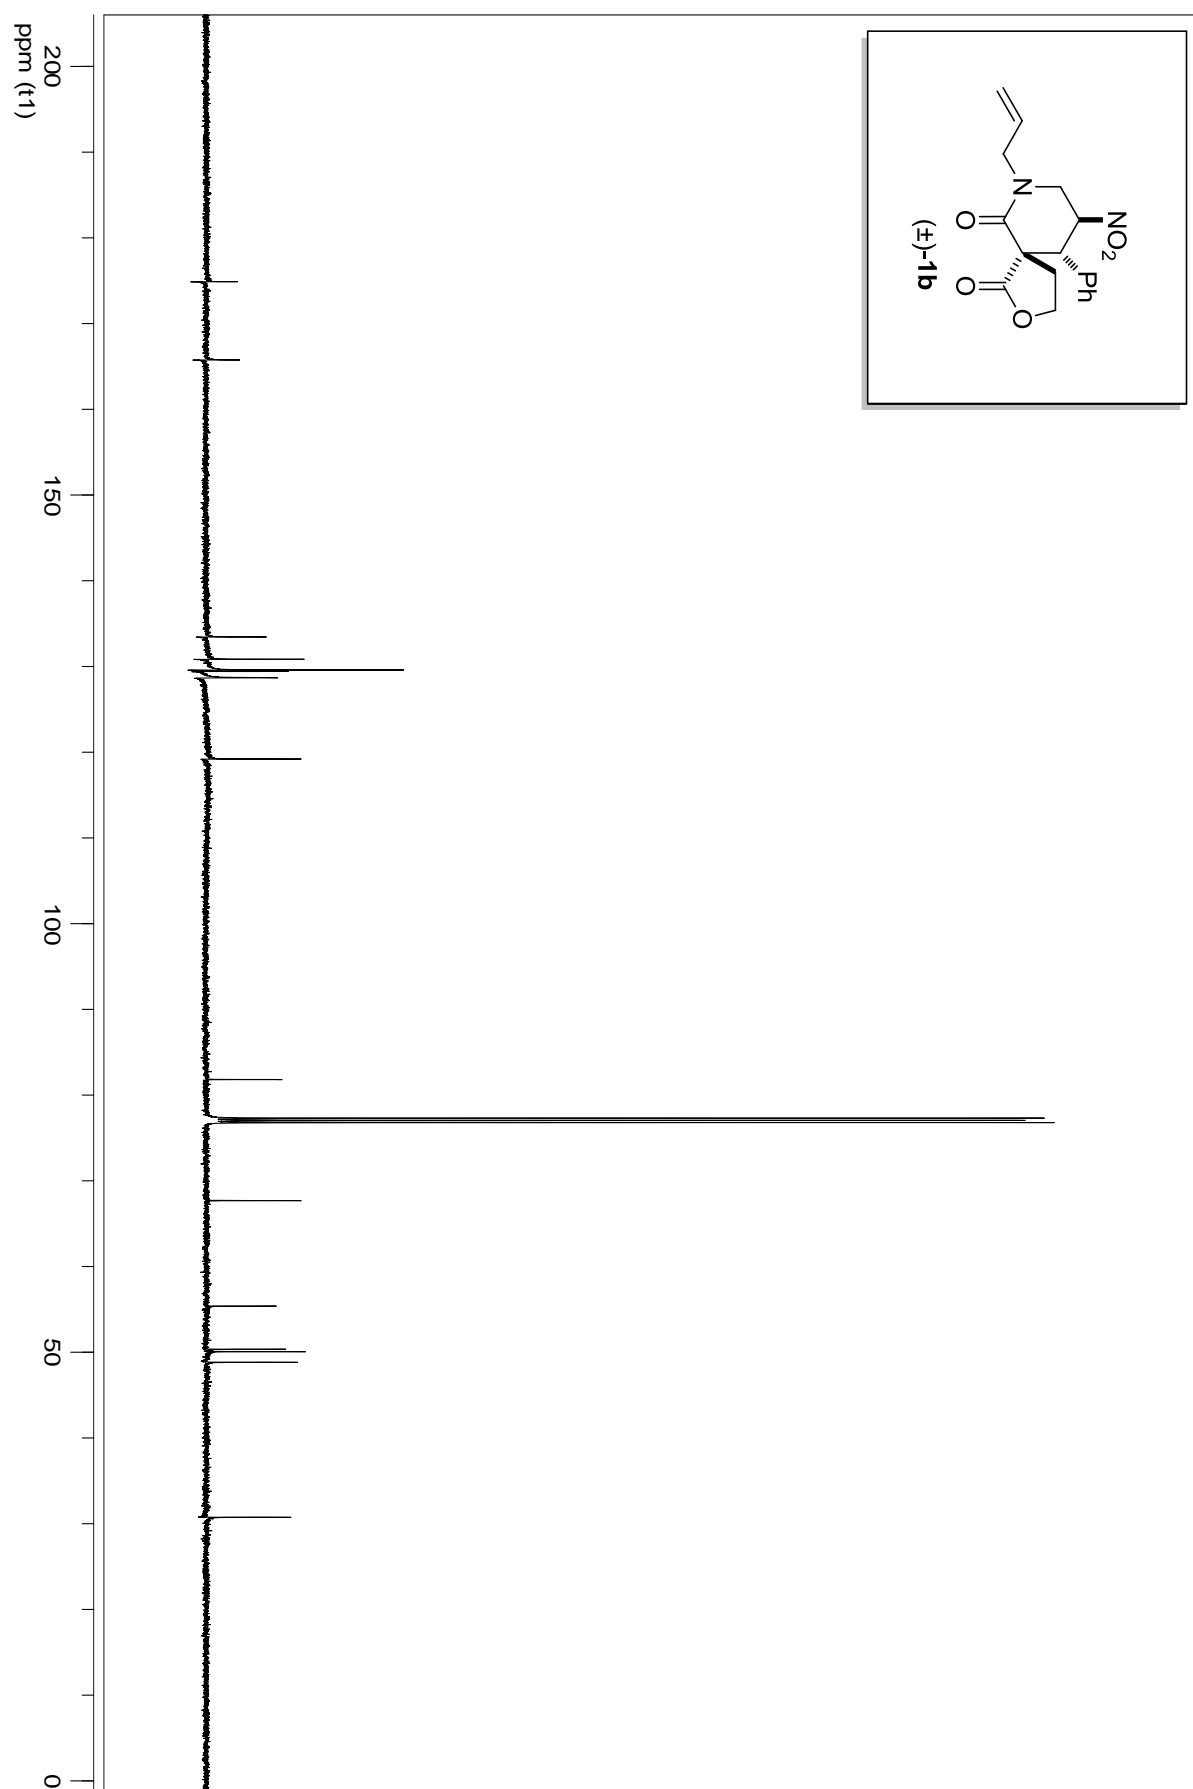

### 5.7. $^1\text{H}$ NMR spectra of 1c

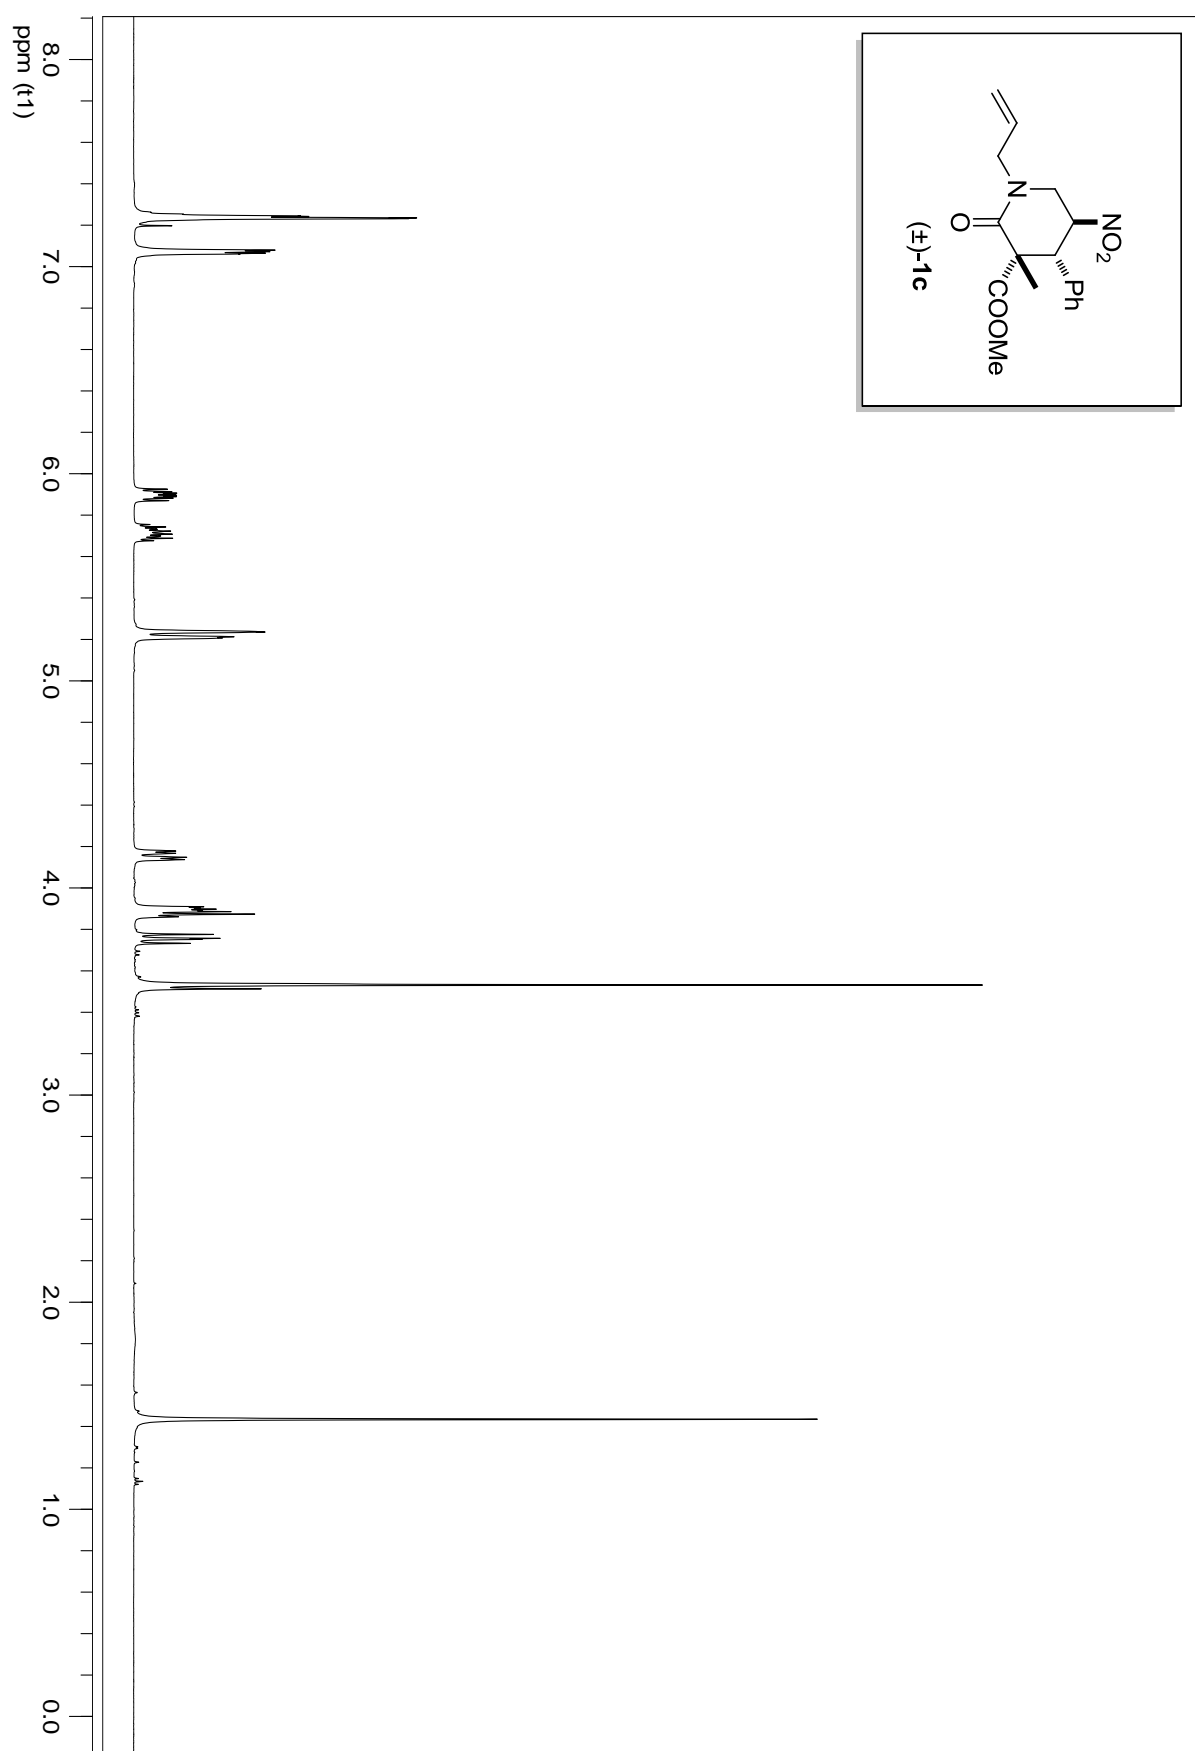

## 5.7. $^{13}\text{C}$ NMR spectra of 1c

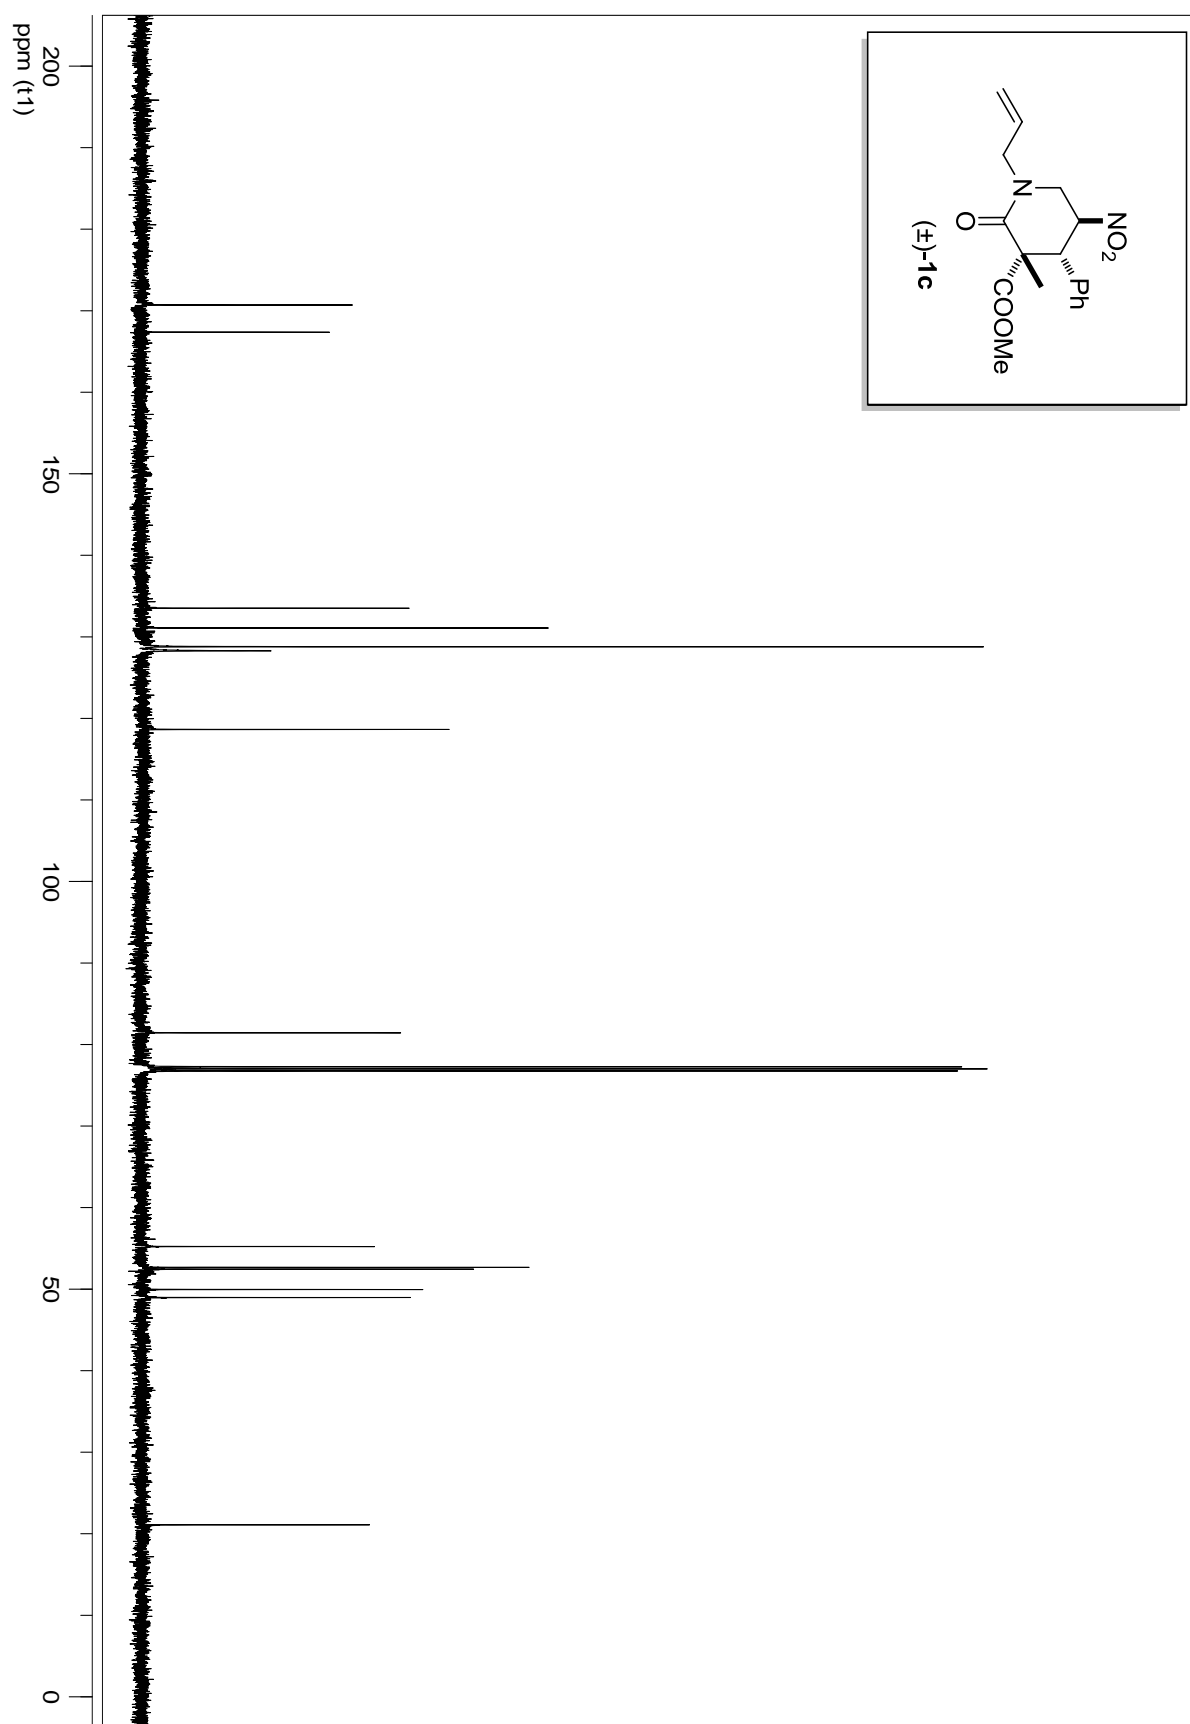

## 5.8. $^1\text{H}$ NMR spectra of 1d

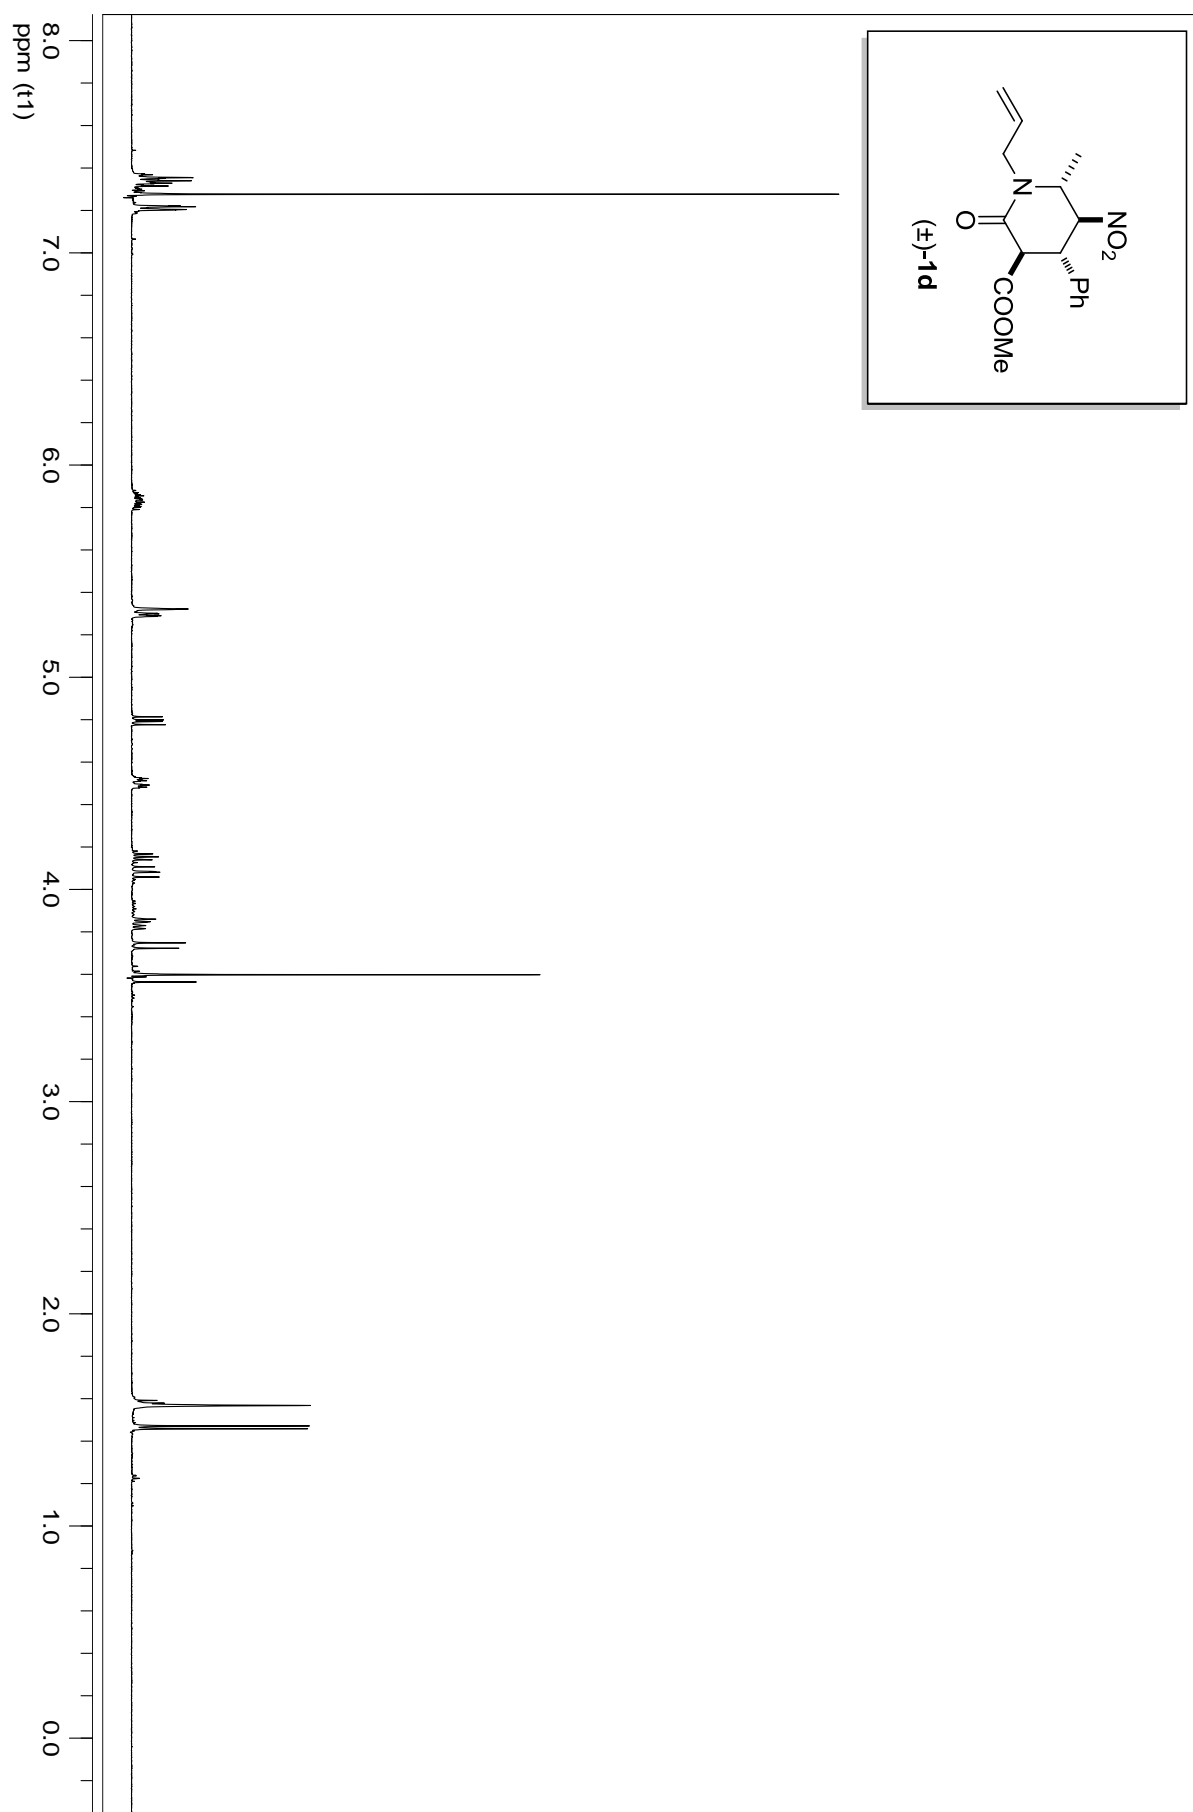



## 5.8. $^{13}\text{C}$ NMR spectra of 1d

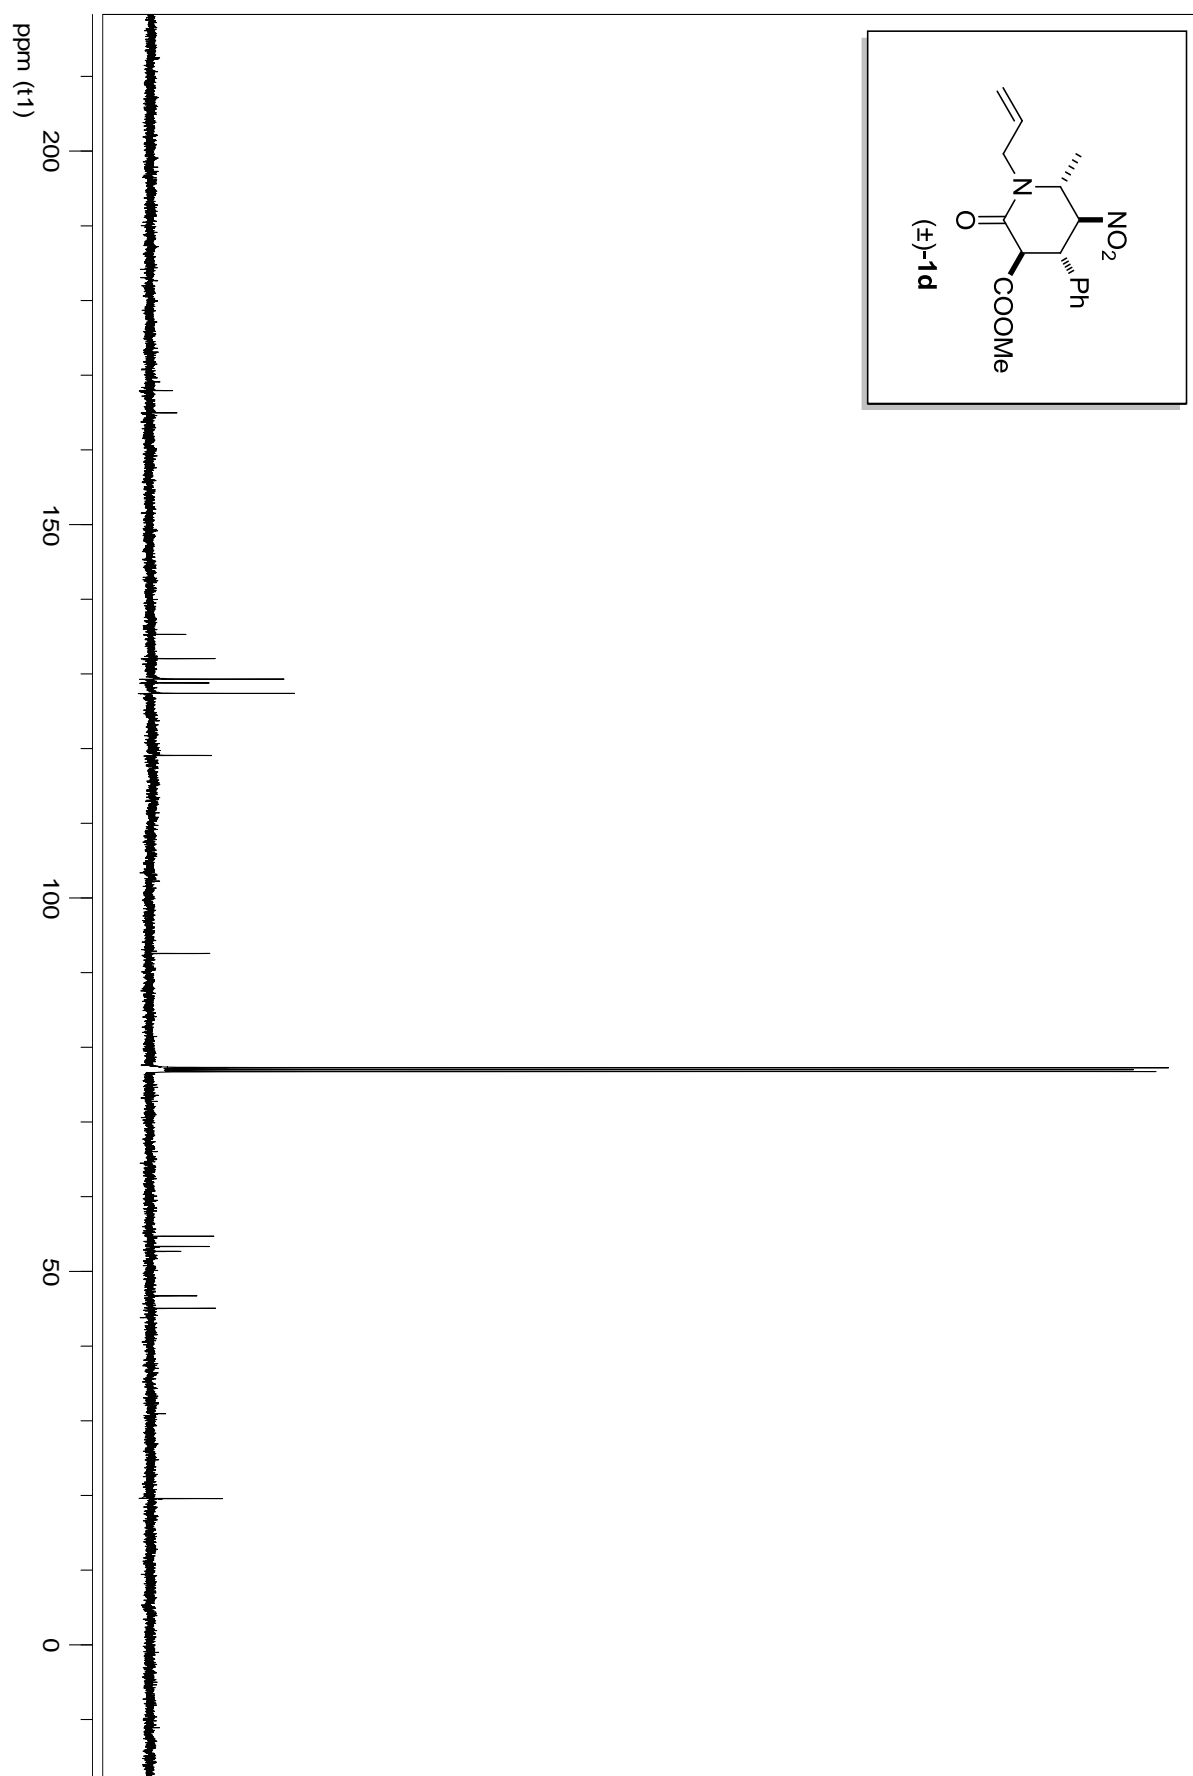

## 5.9 $^1\text{H}$ NMR spectra of 1e

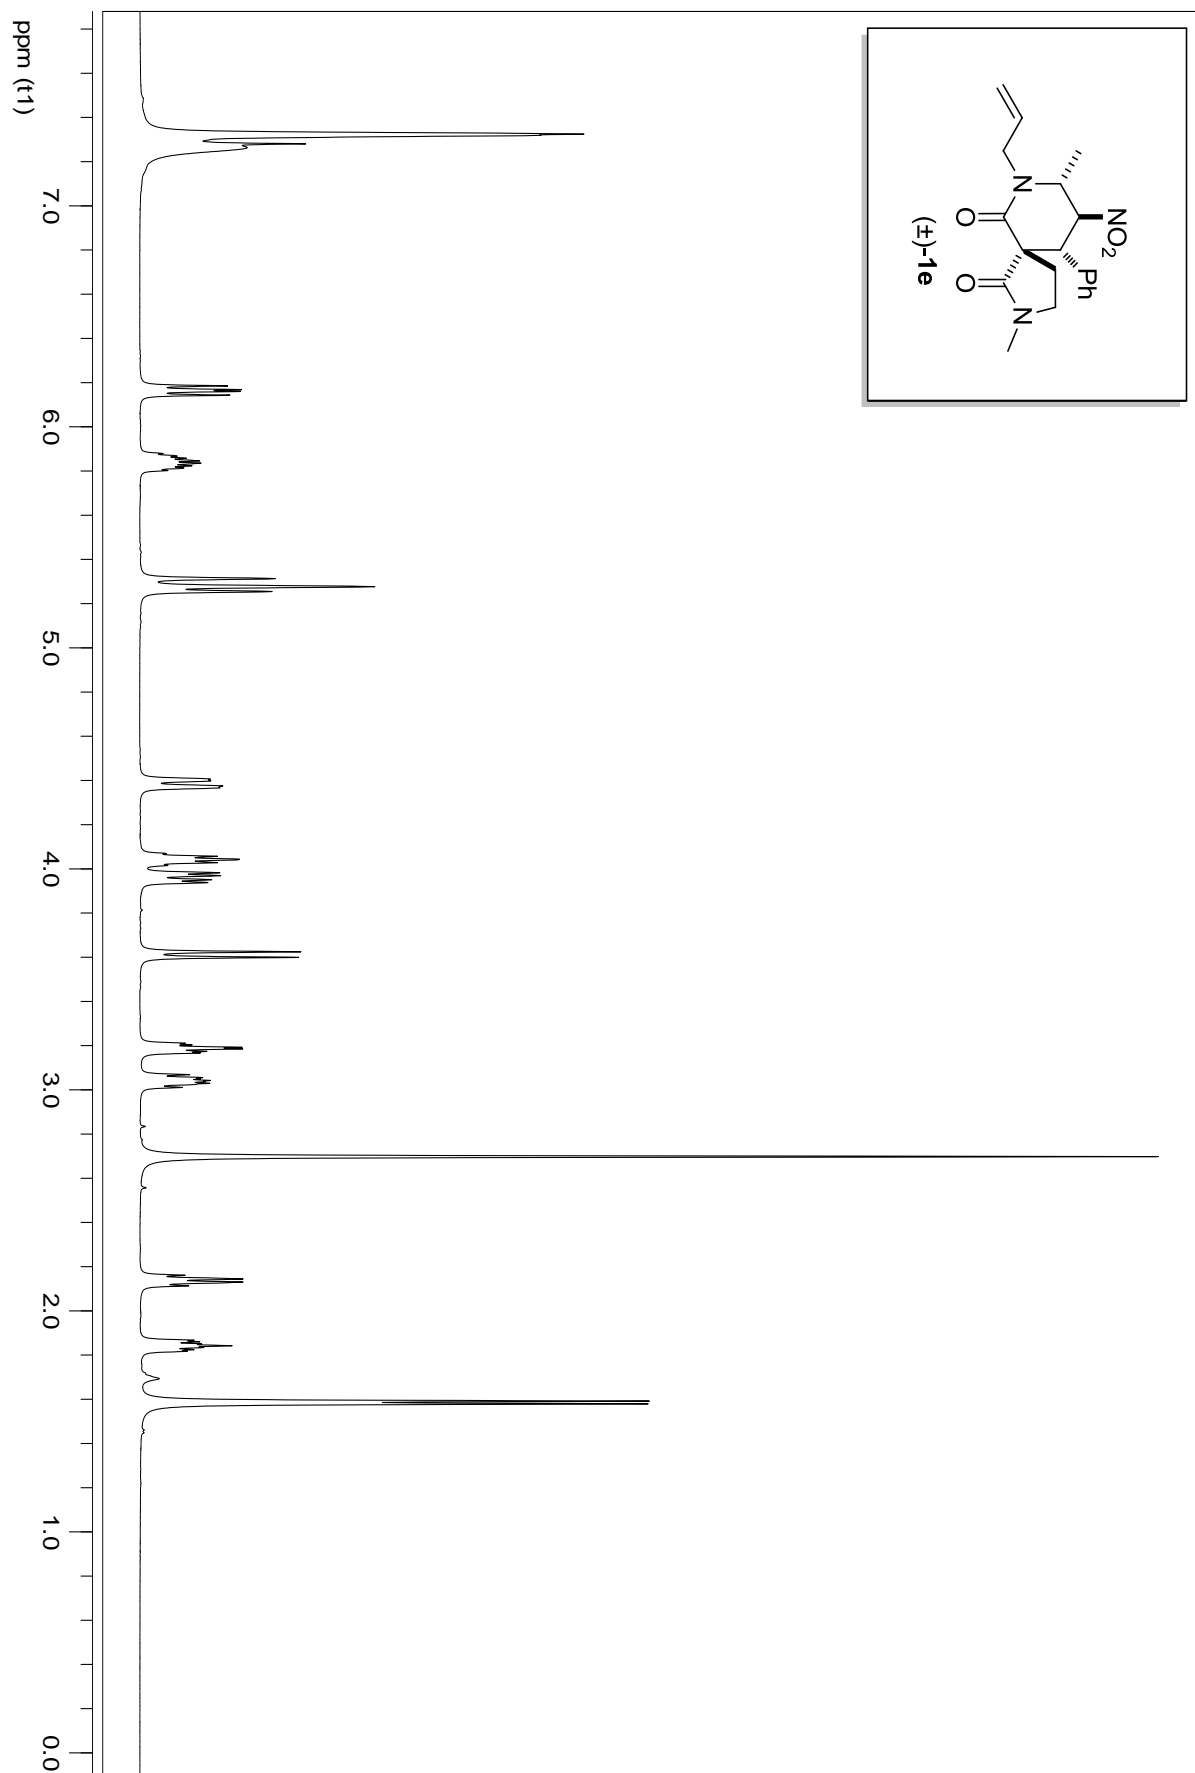

## 5.9. $^{13}\text{C}$ NMR spectra of **1e**

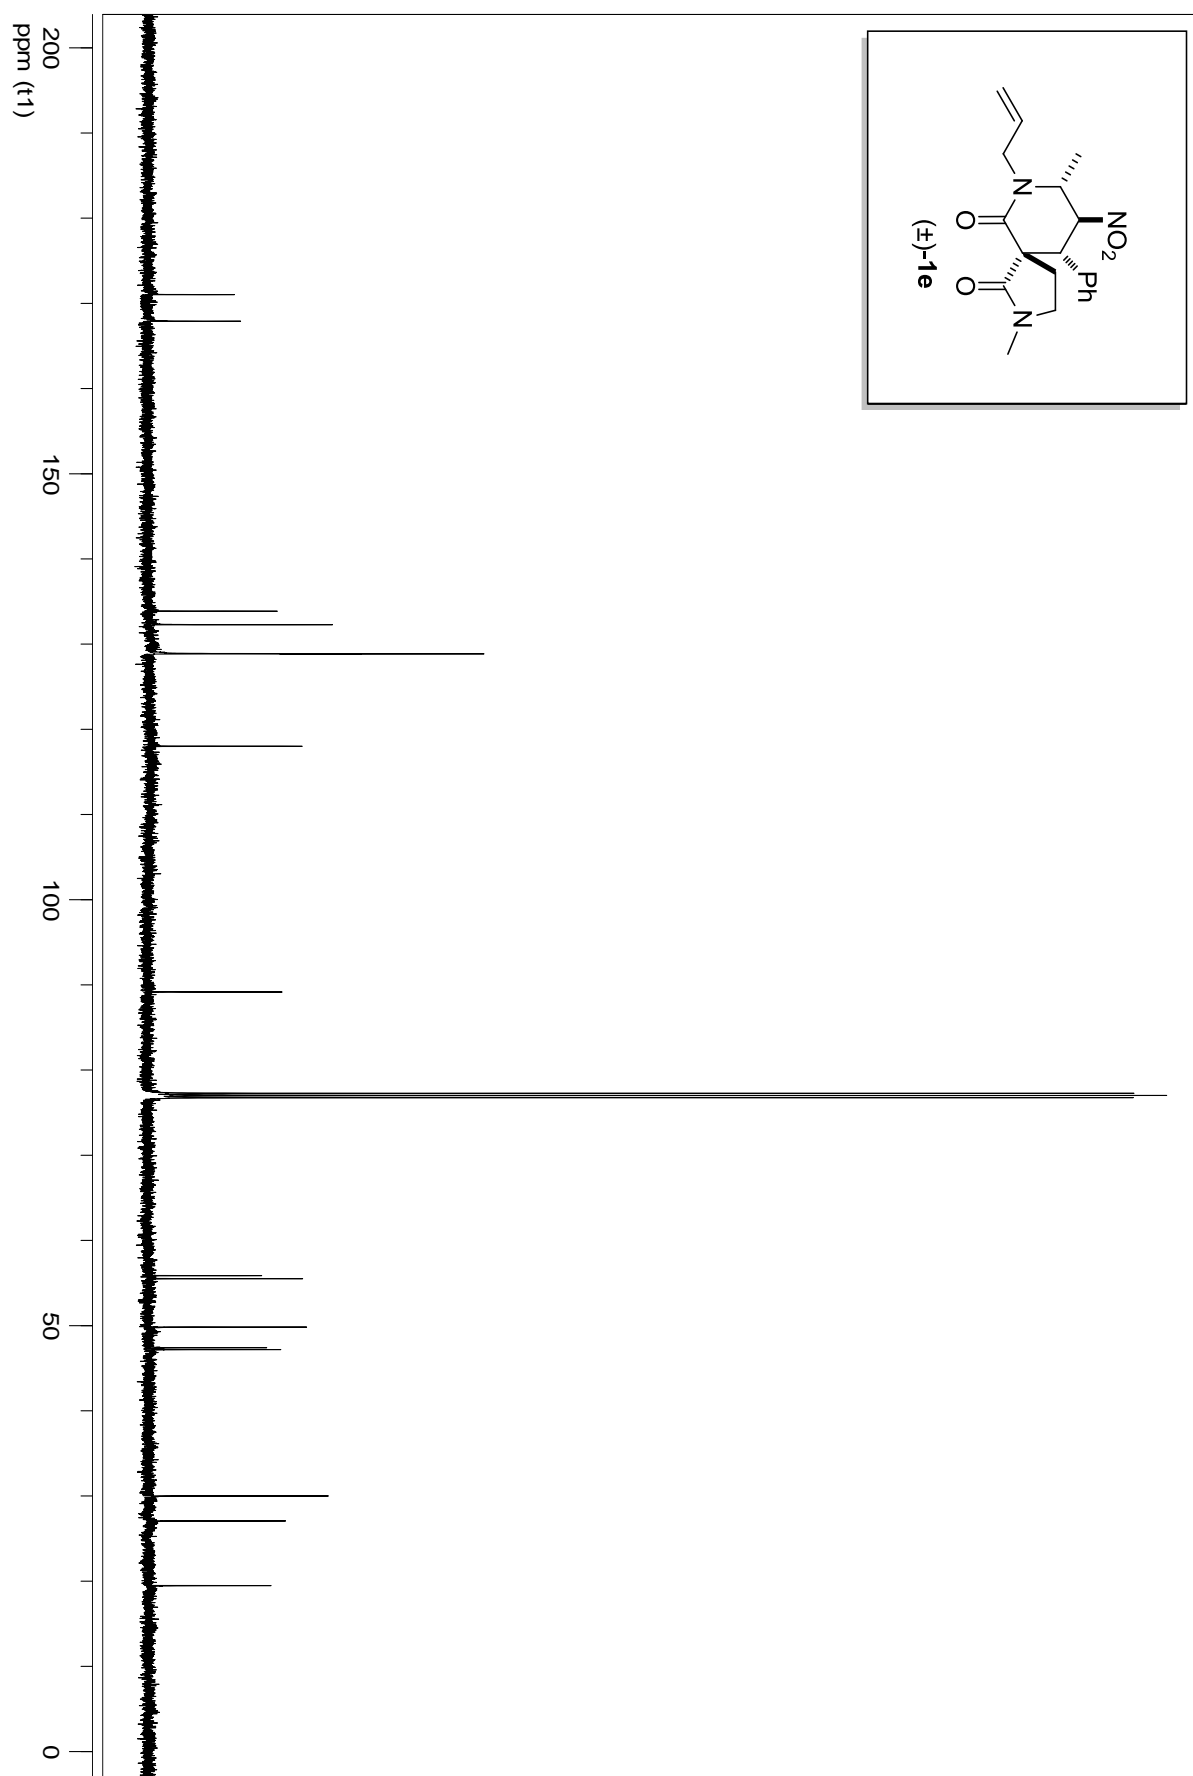

## 5.10. $^1\text{H}$ NMR spectra of **1f**

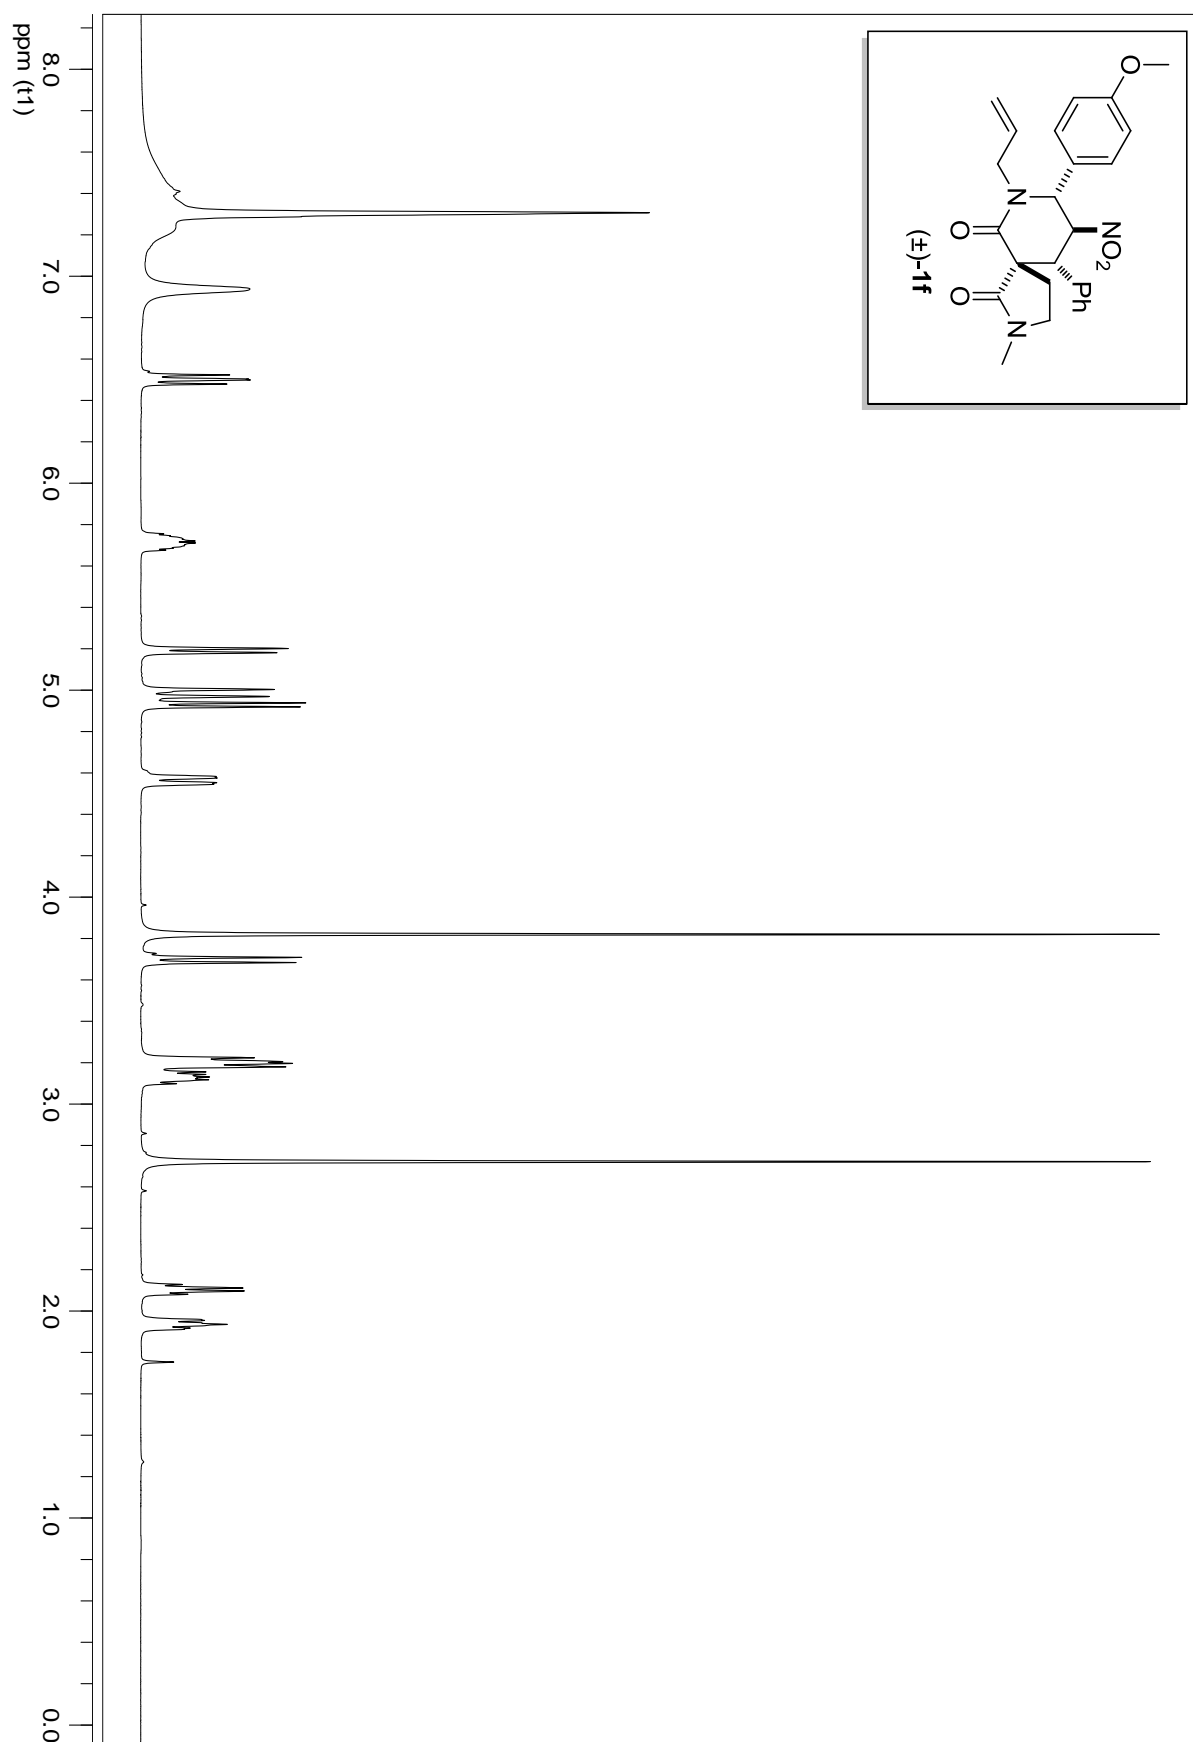

## 5.10. $^{13}\text{C}$ NMR spectra of 1f

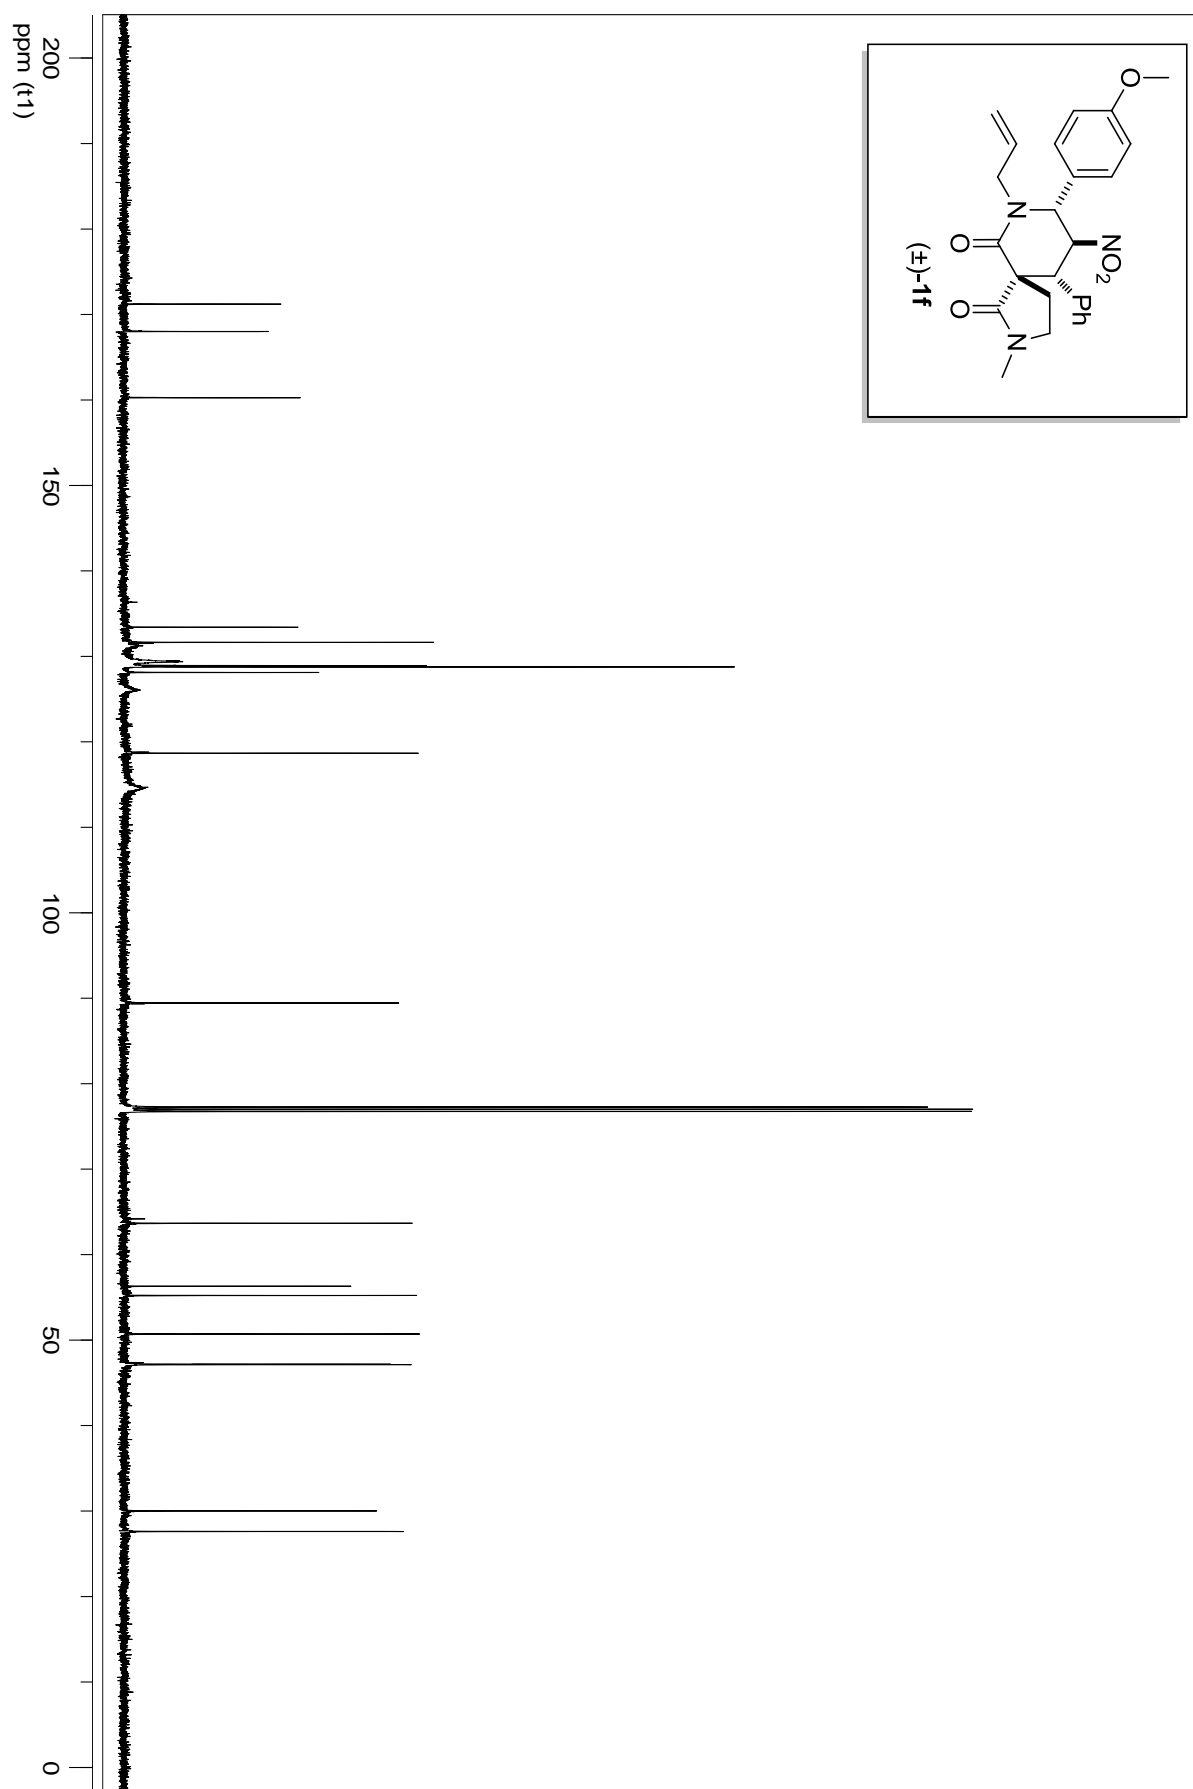

## 5.11. $^1\text{H}$ NMR spectra of **1g**

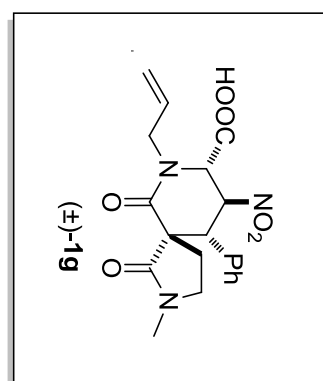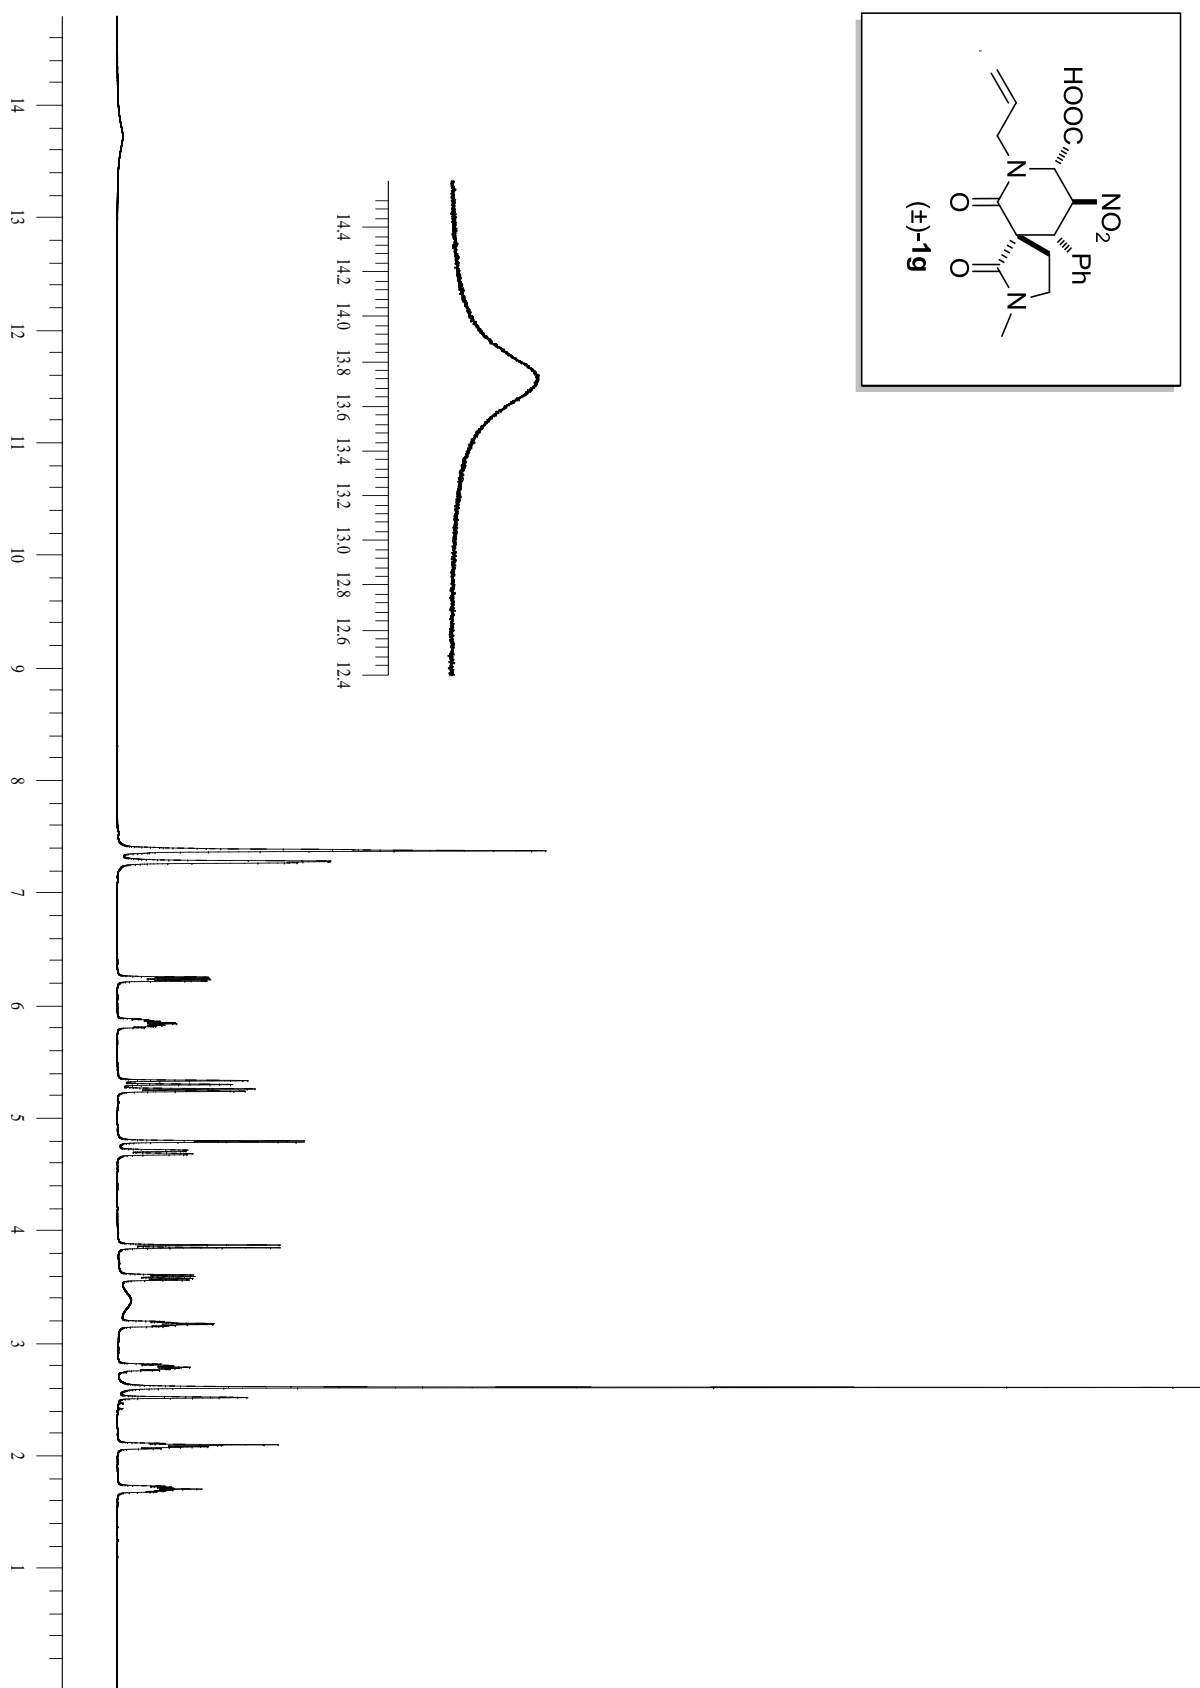

### 5.11. $^{13}\text{C}$ NMR spectra of **1g**

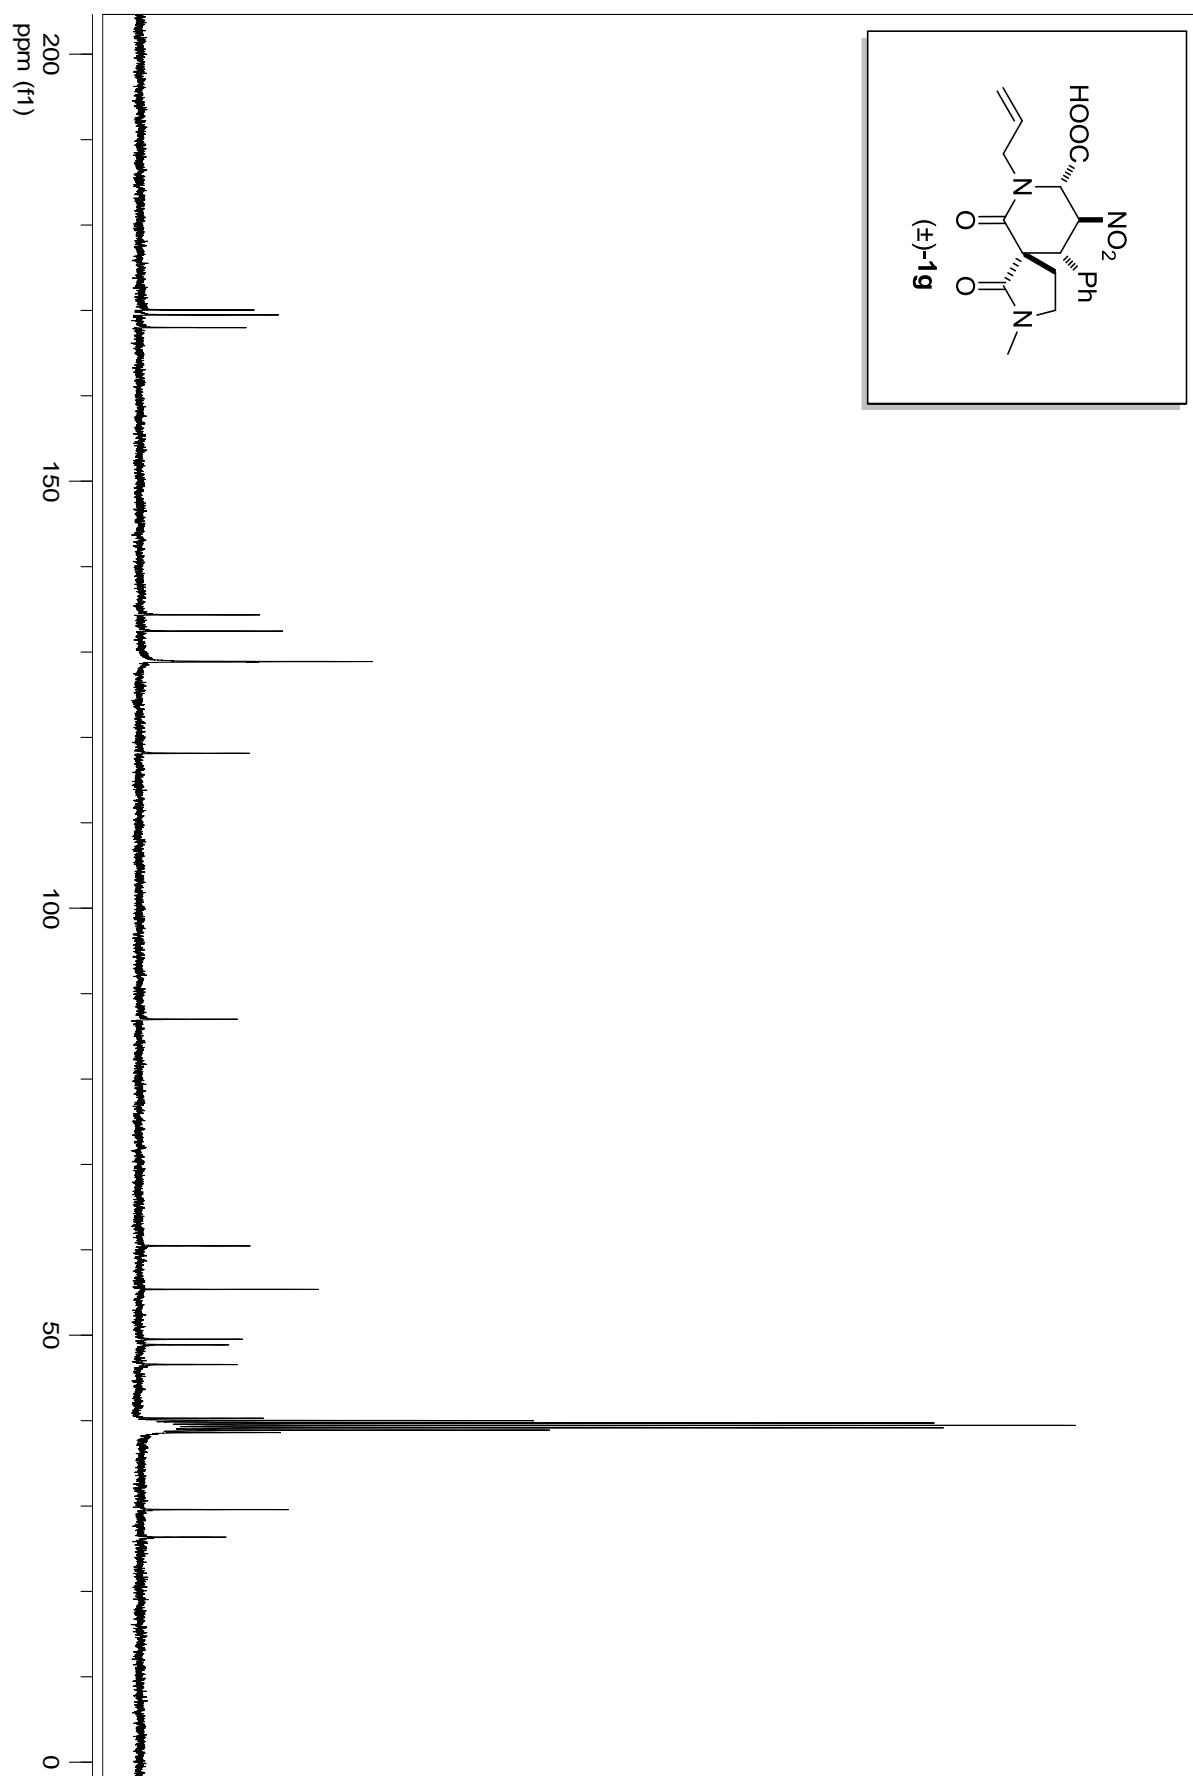

### 5.12. $^1\text{H}$ NMR spectra of 1h

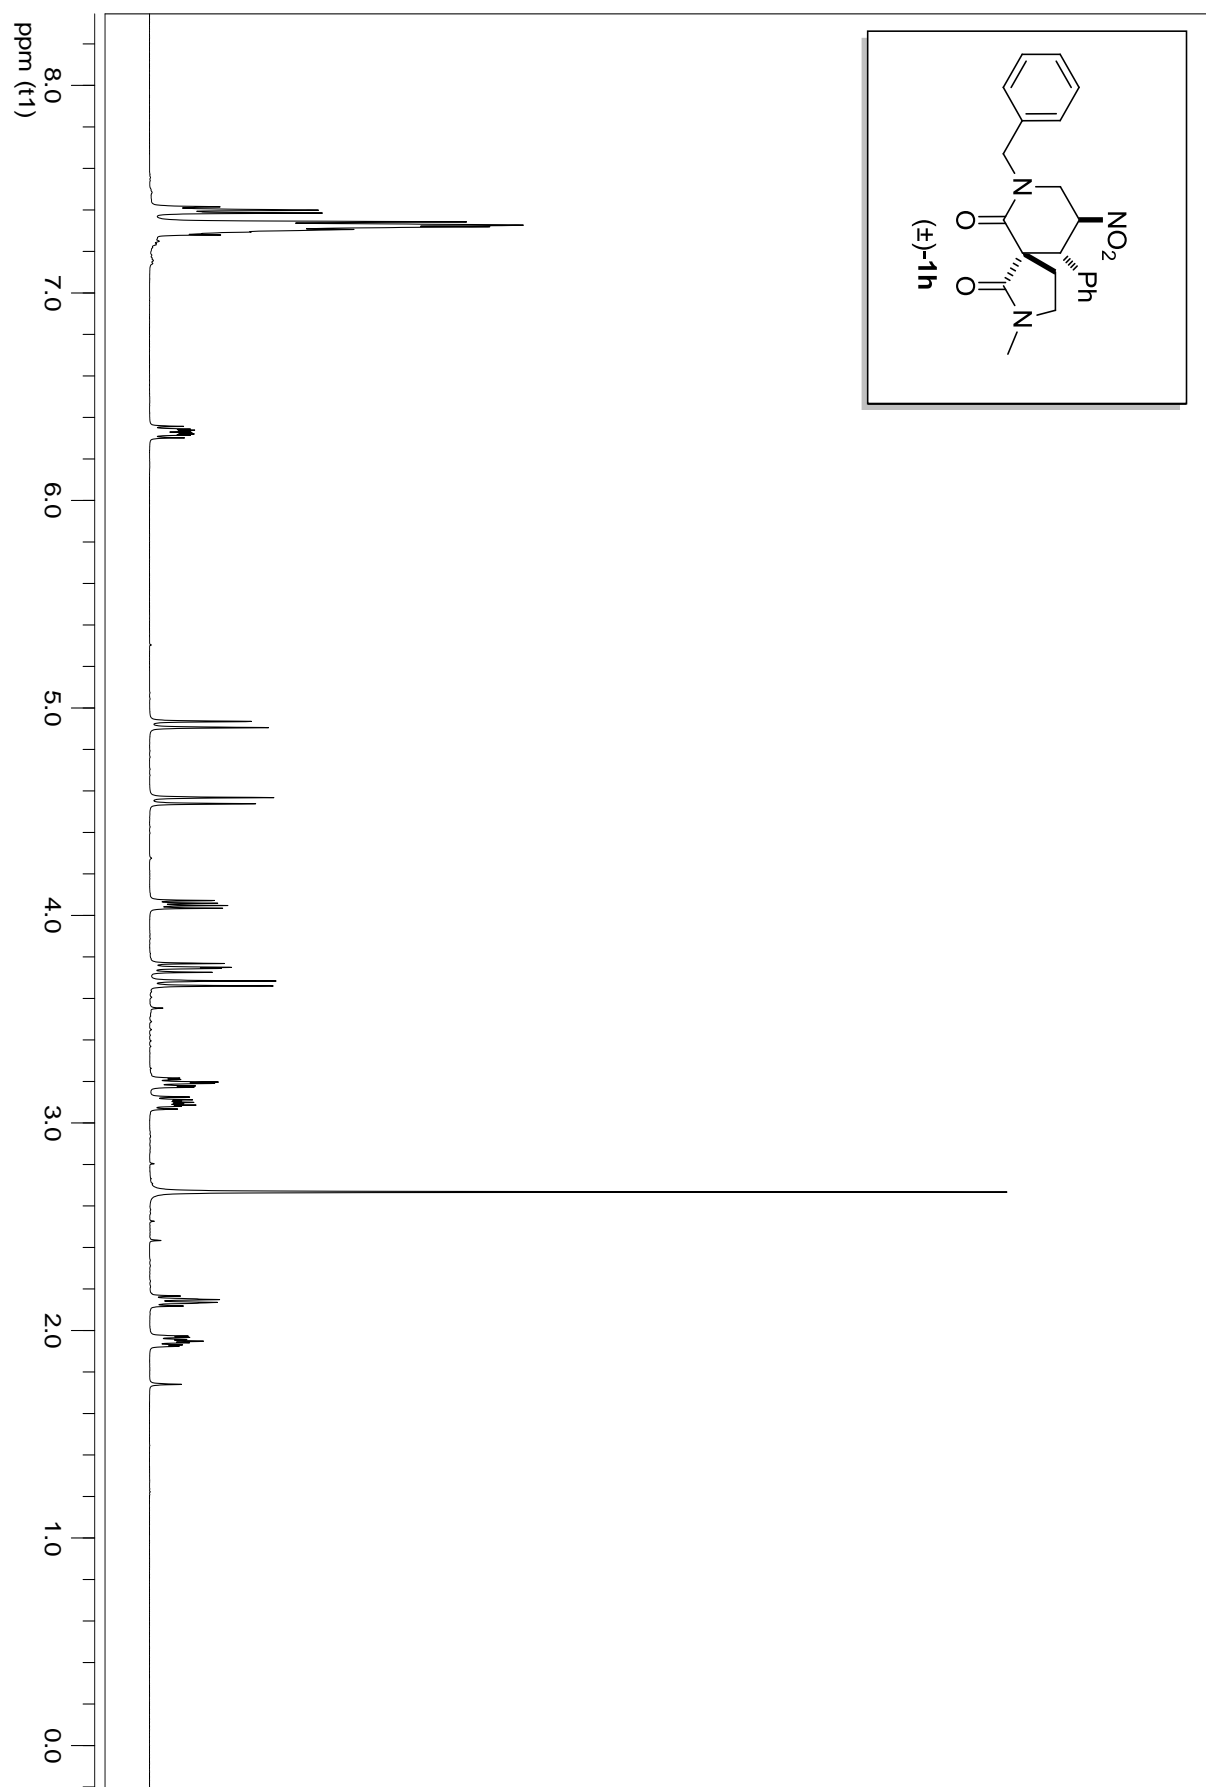



## 5.12. $^{13}\text{C}$ NMR spectra of 1h

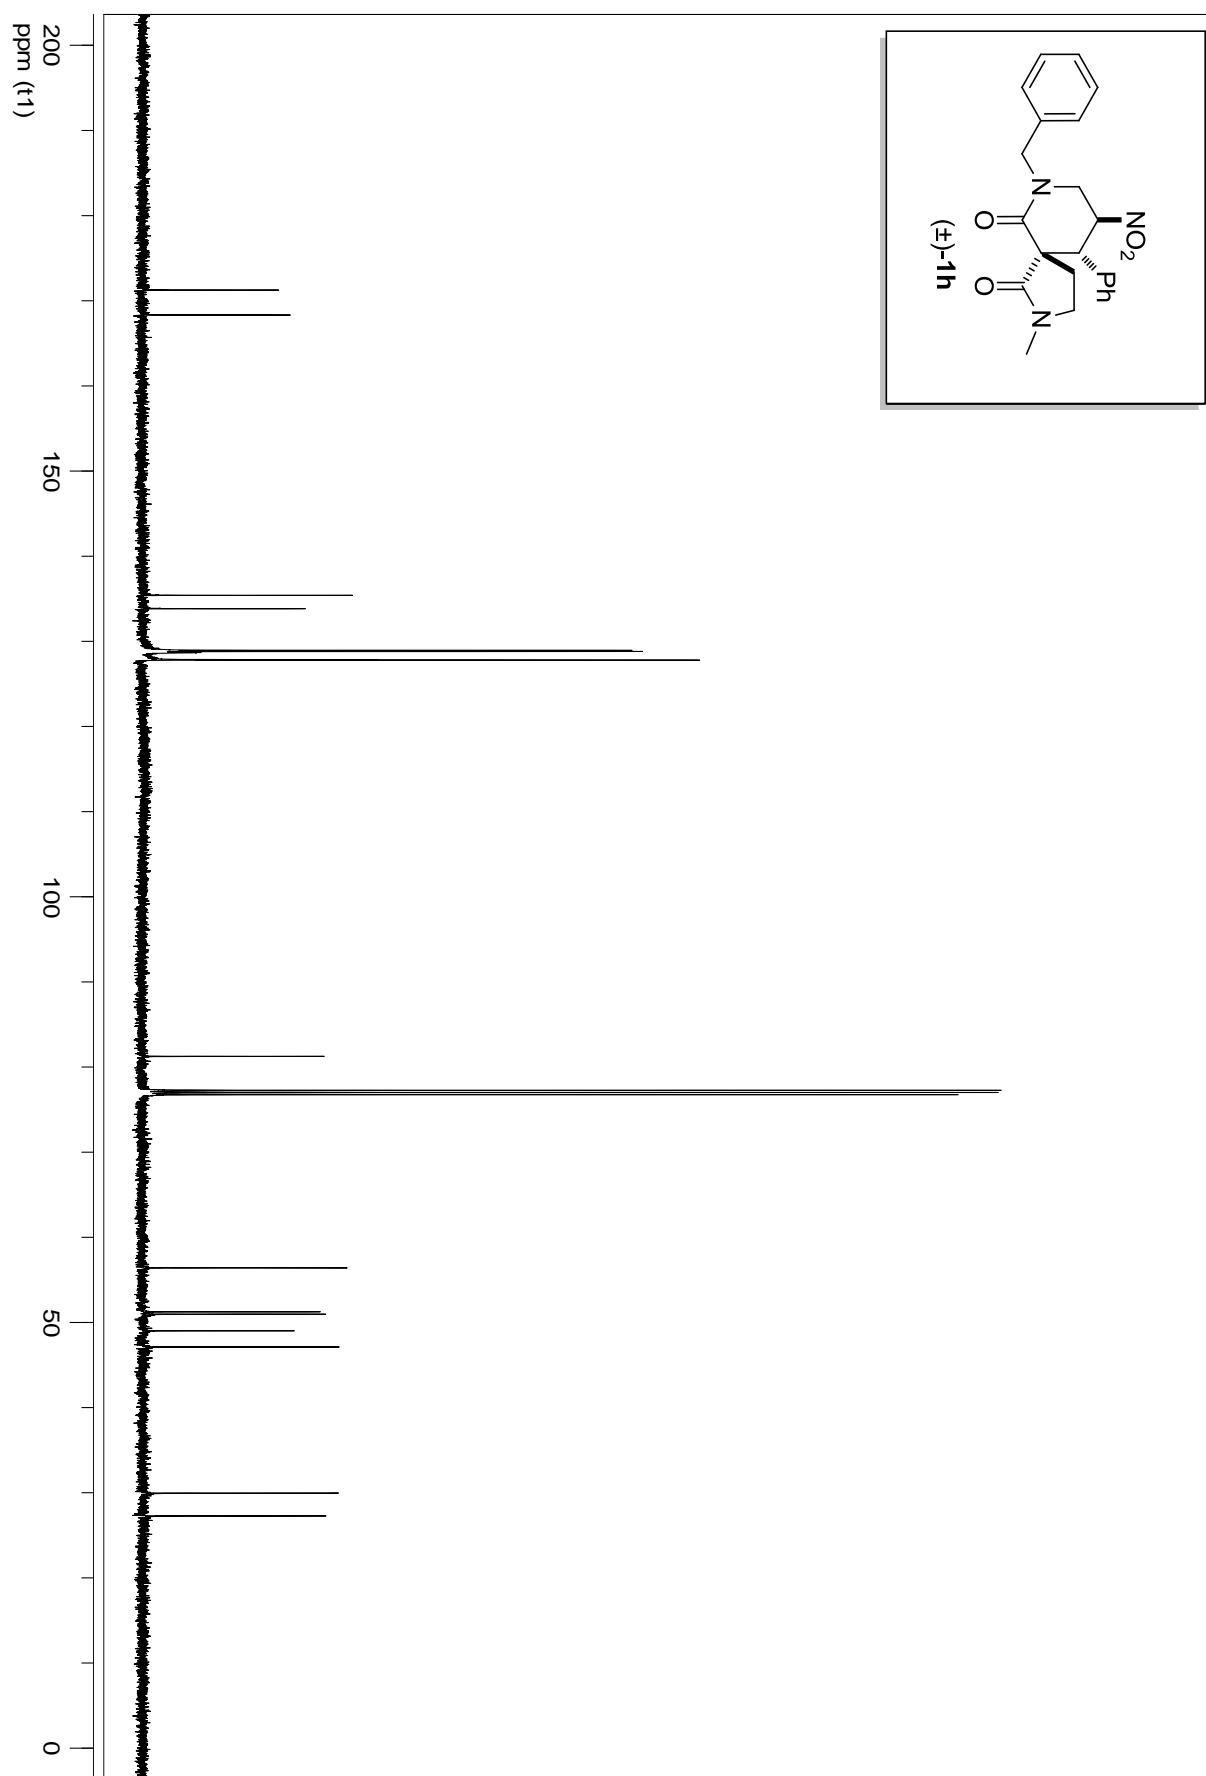

### 5.13. <sup>1</sup>H NMR spectra of 1i

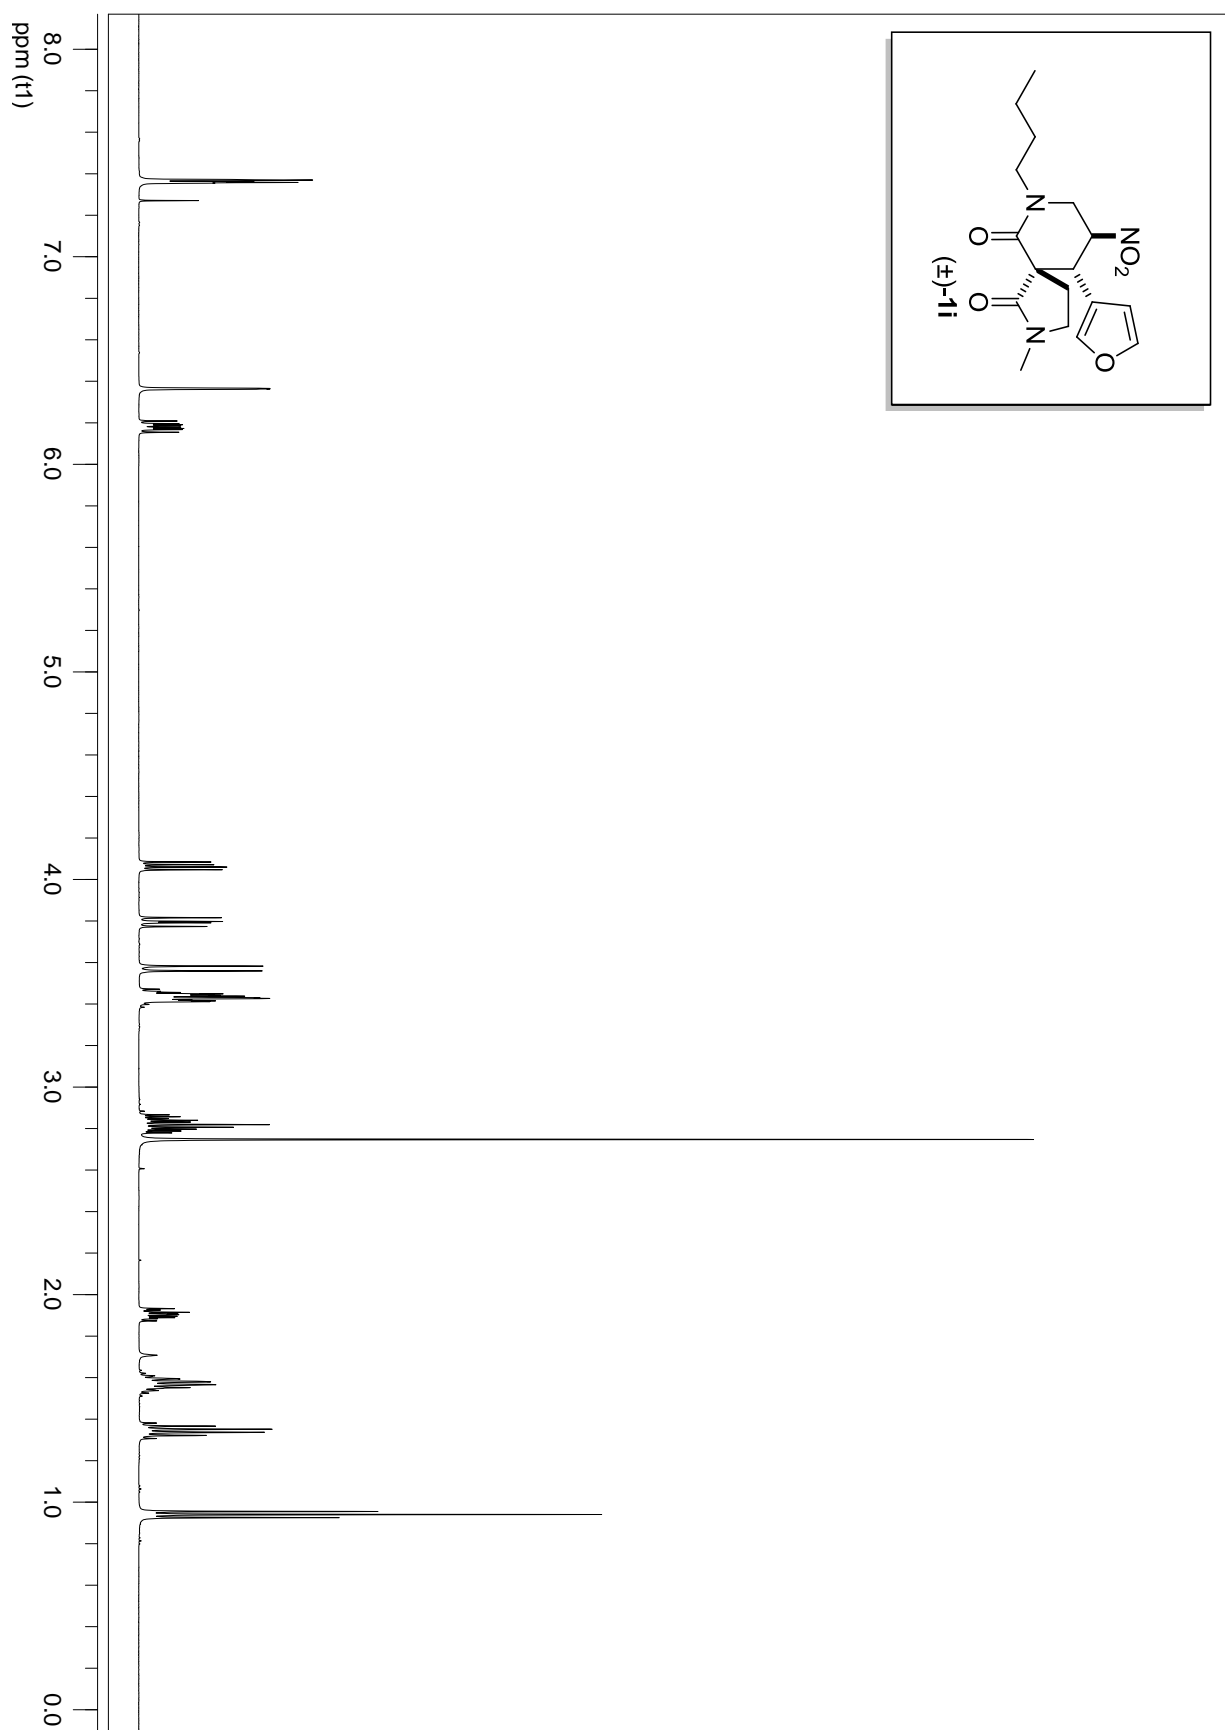

### 5.13. $^{13}\text{C}$ NMR of 1i

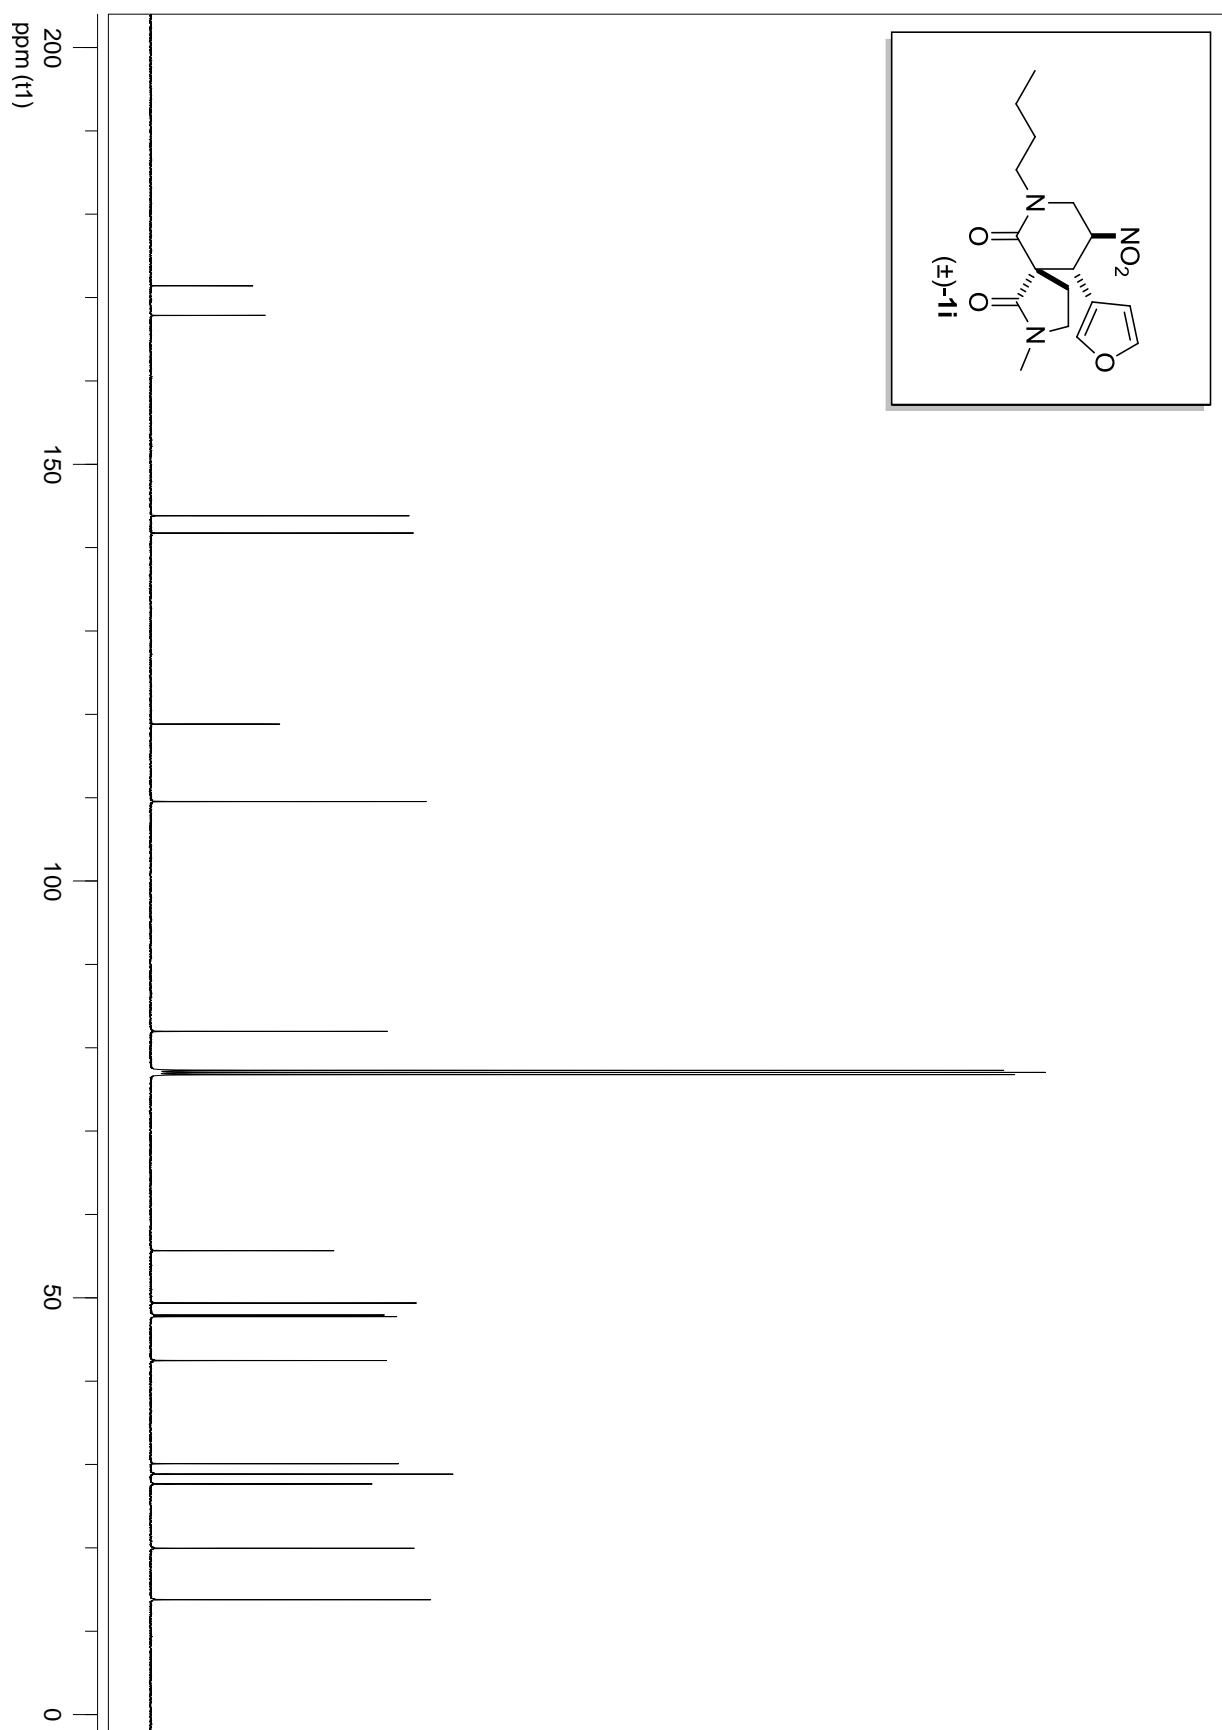

#### 5.14. $^1\text{H}$ NMR spectra of 1j

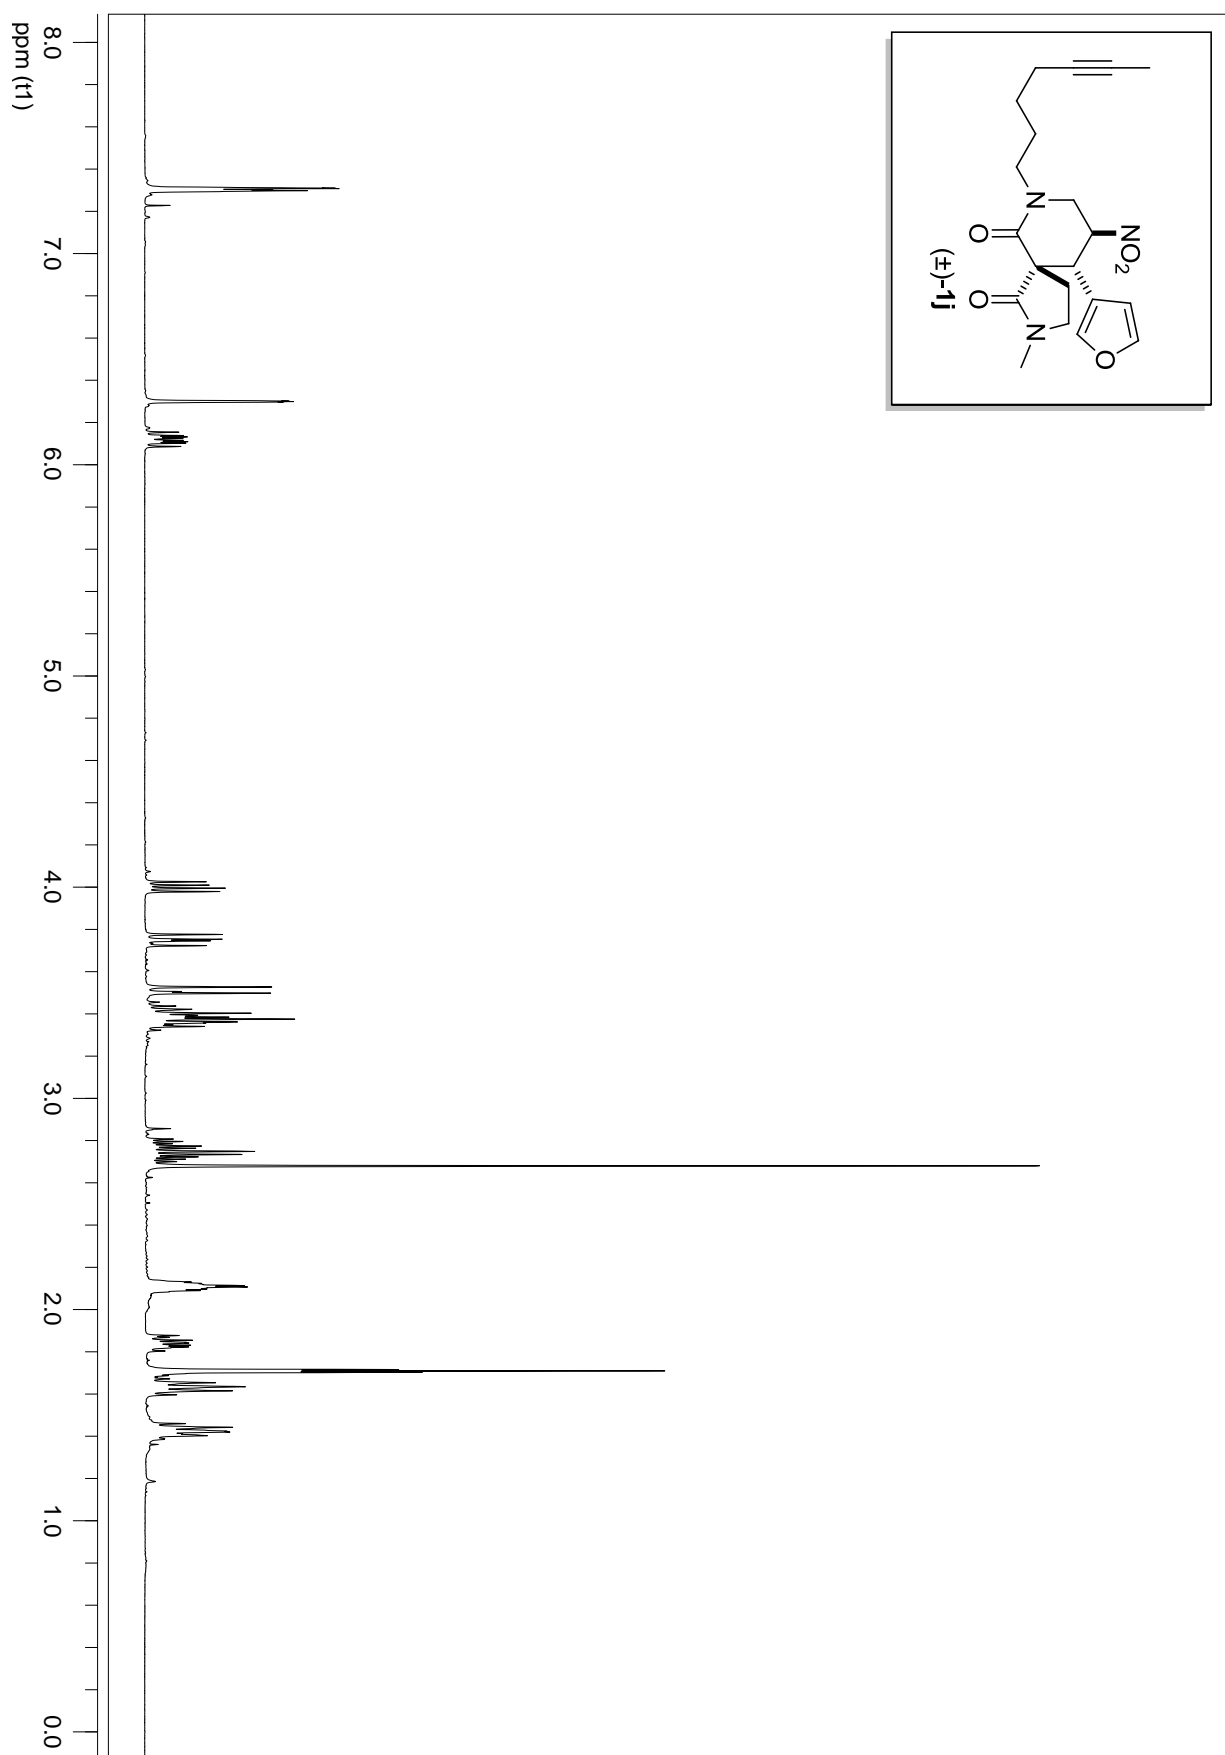

#### 5.14. $^{13}\text{C}$ NMR spectra of 1j

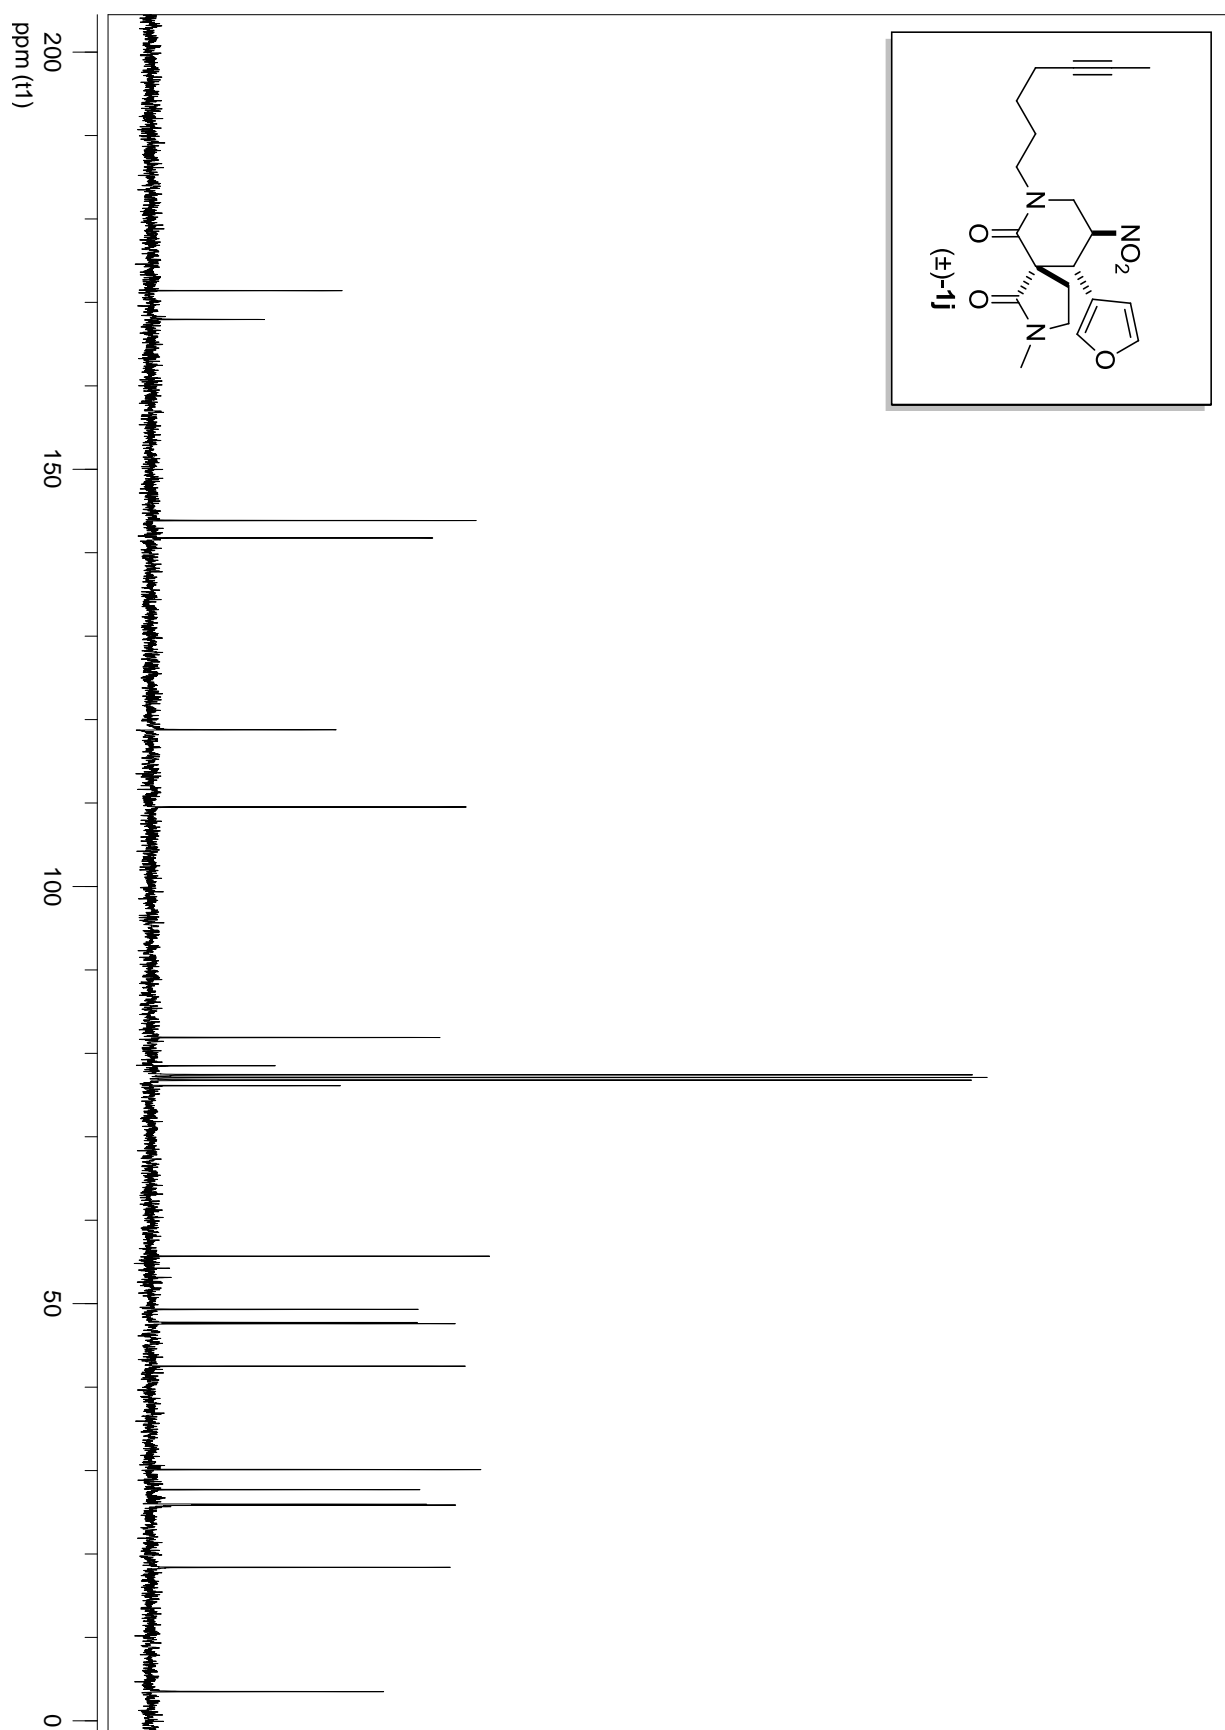

### 5.15. <sup>1</sup>H NMR spectra of 2a

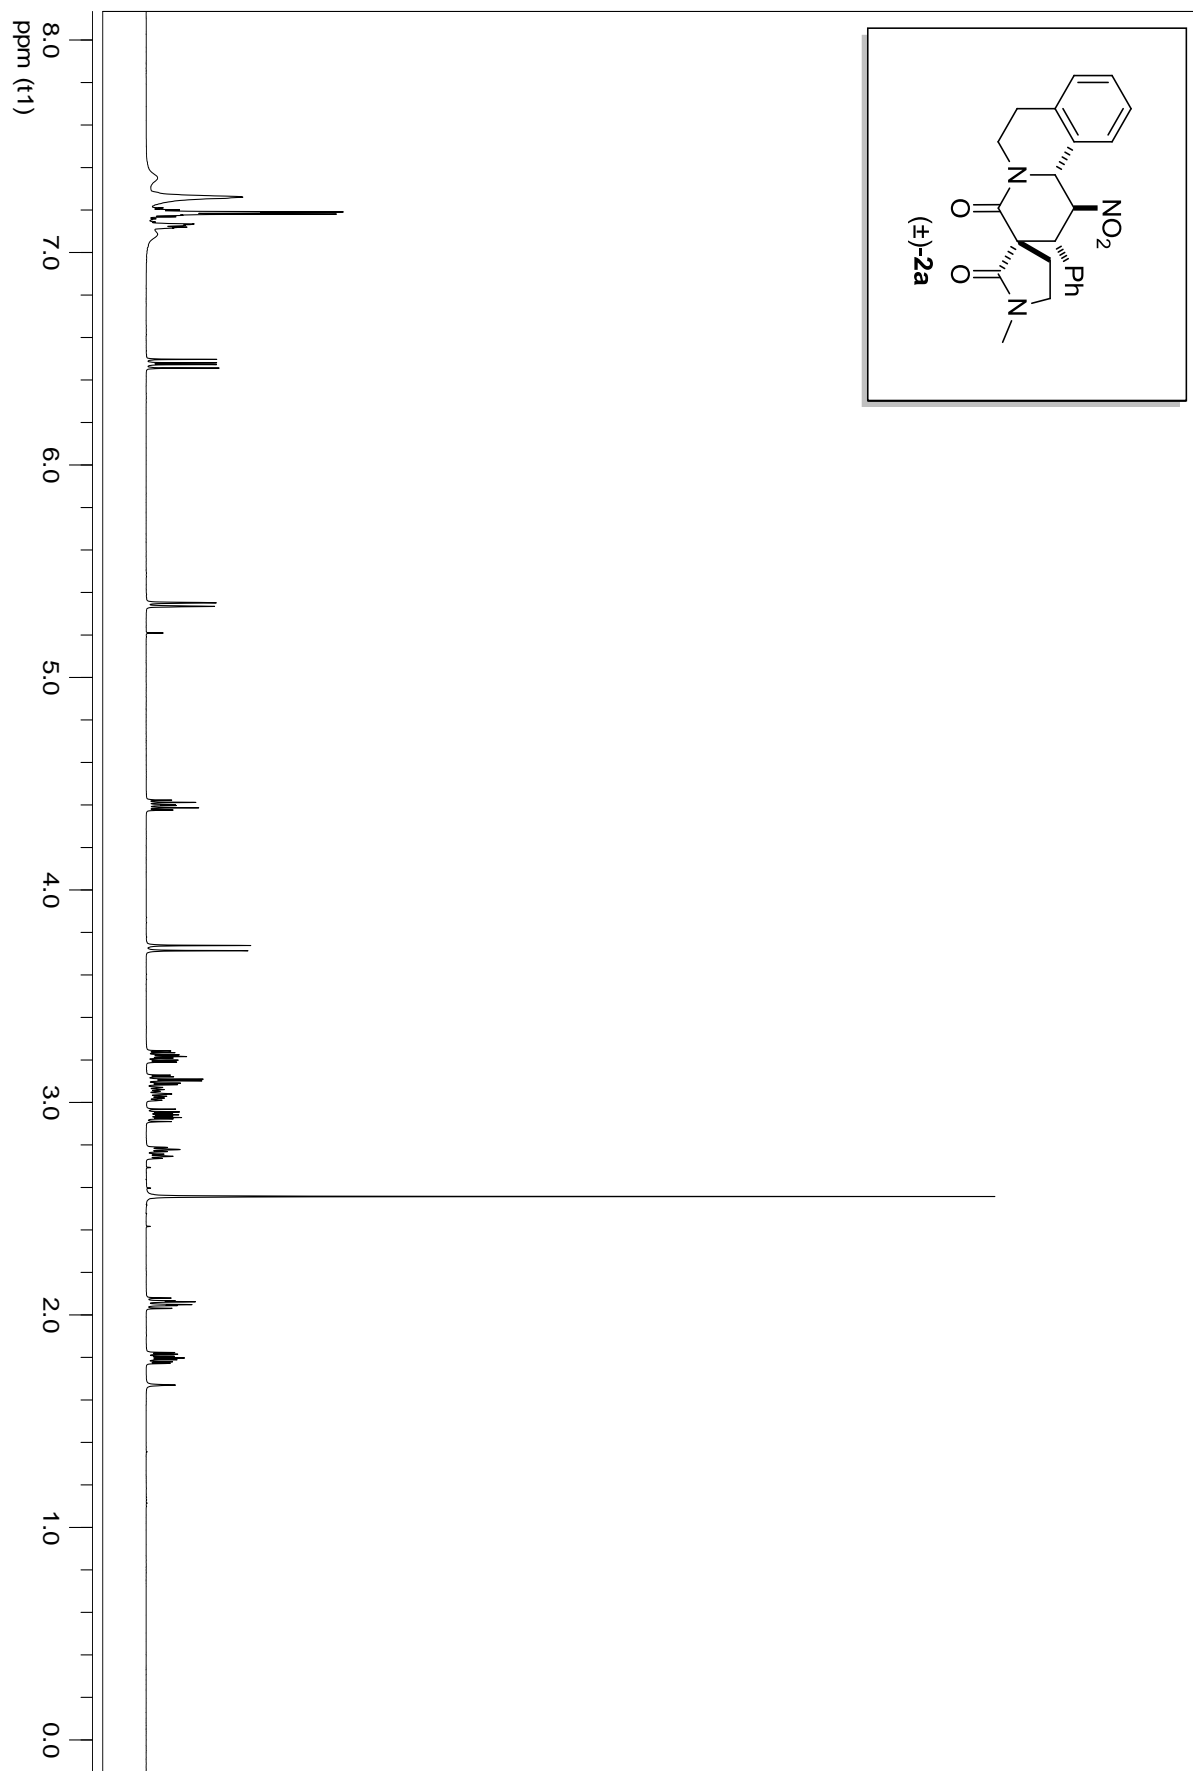

### 5.15. $^{13}\text{C}$ NMR spectra of 2a

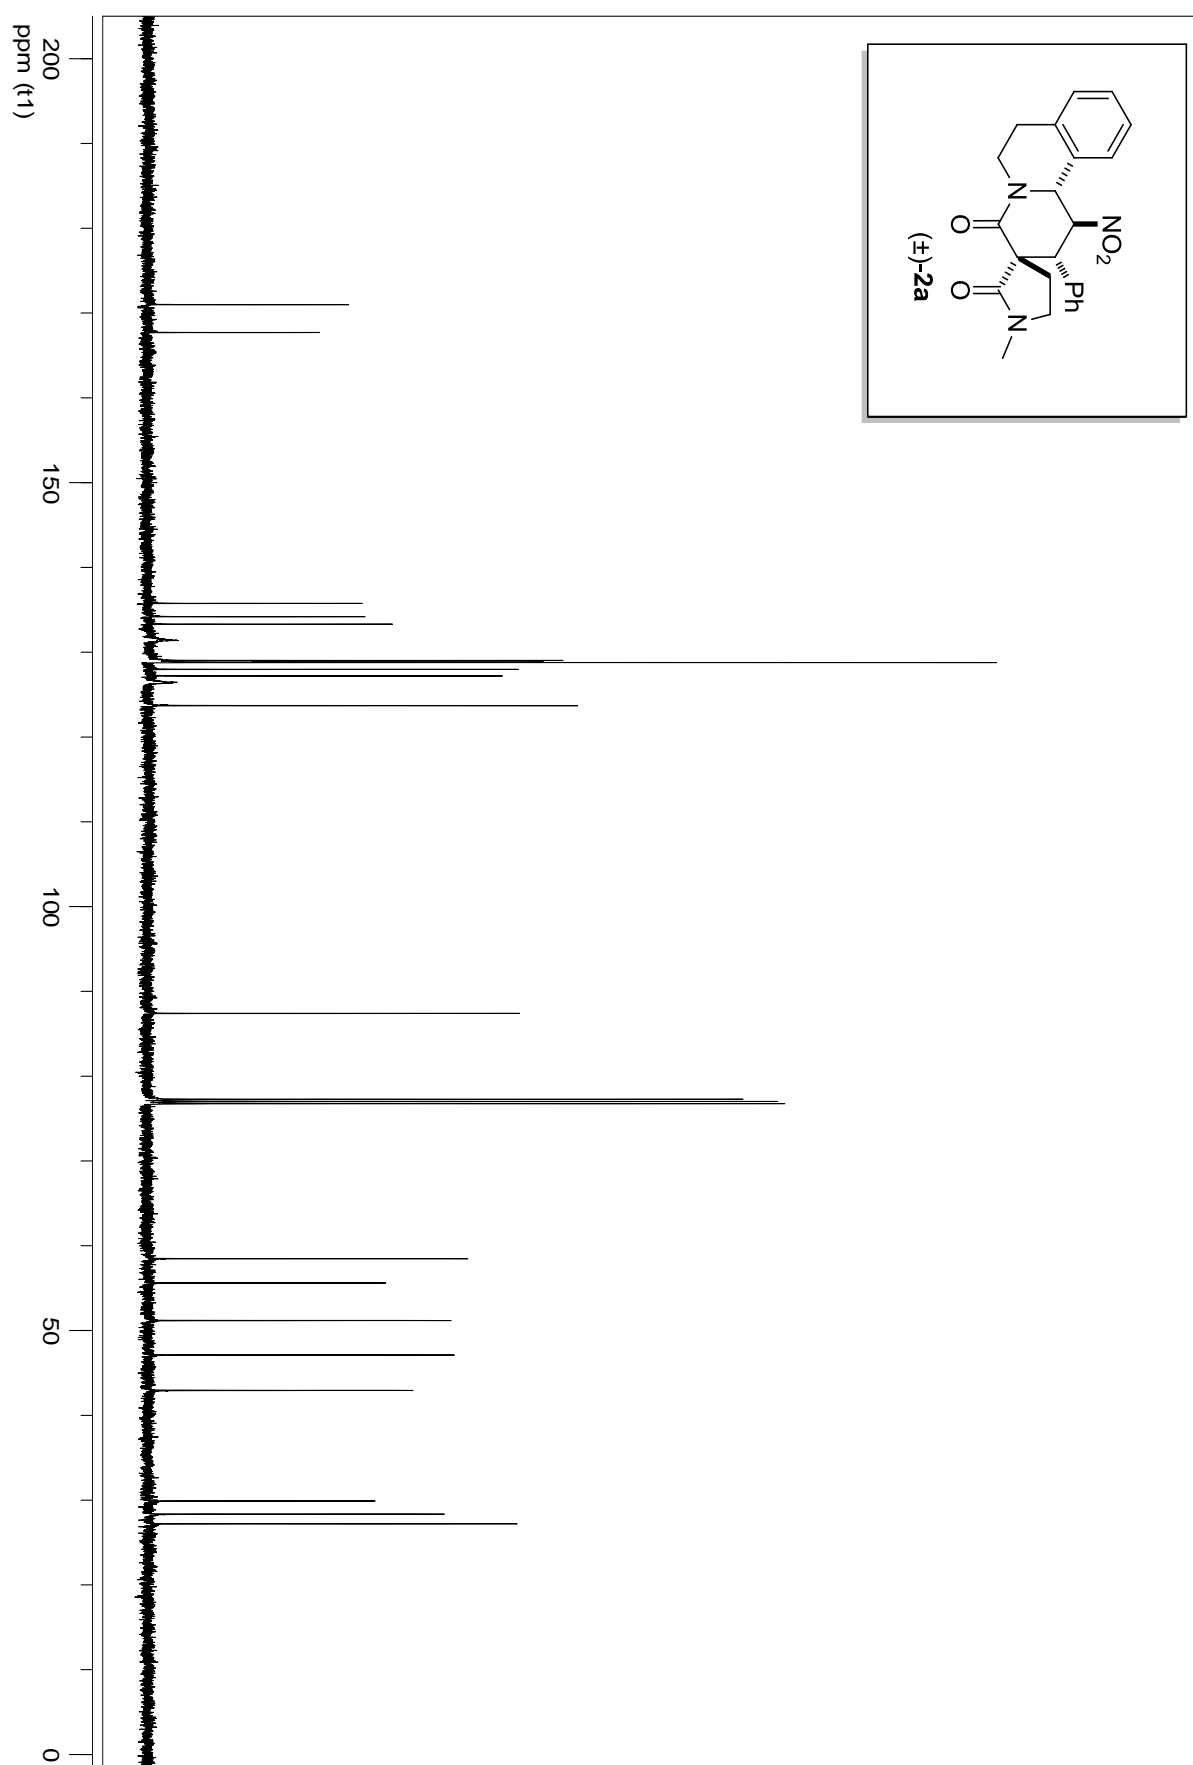

### 5.16. $^1\text{H}$ NMR spectra of 2a''

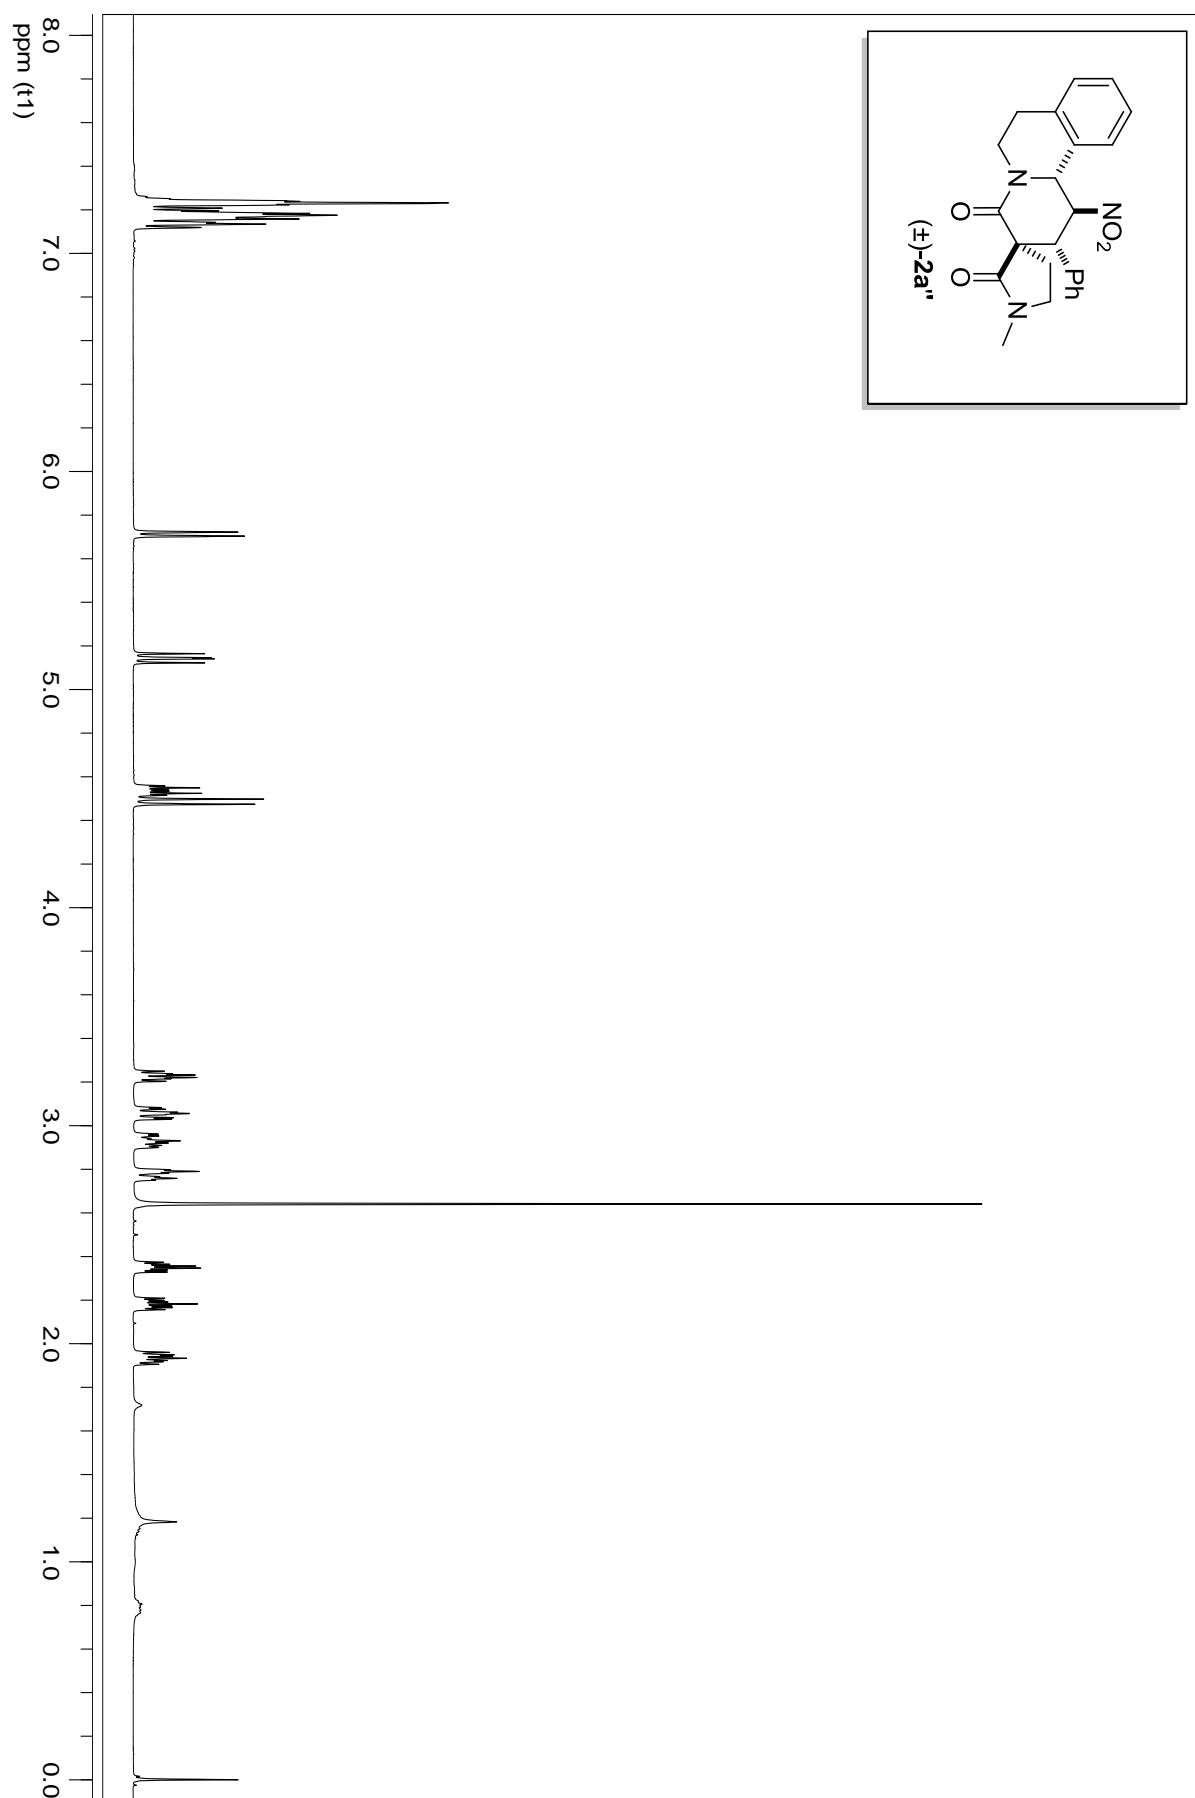



# 5.16. $^{13}\text{C}$ NMR spectra of 2a''

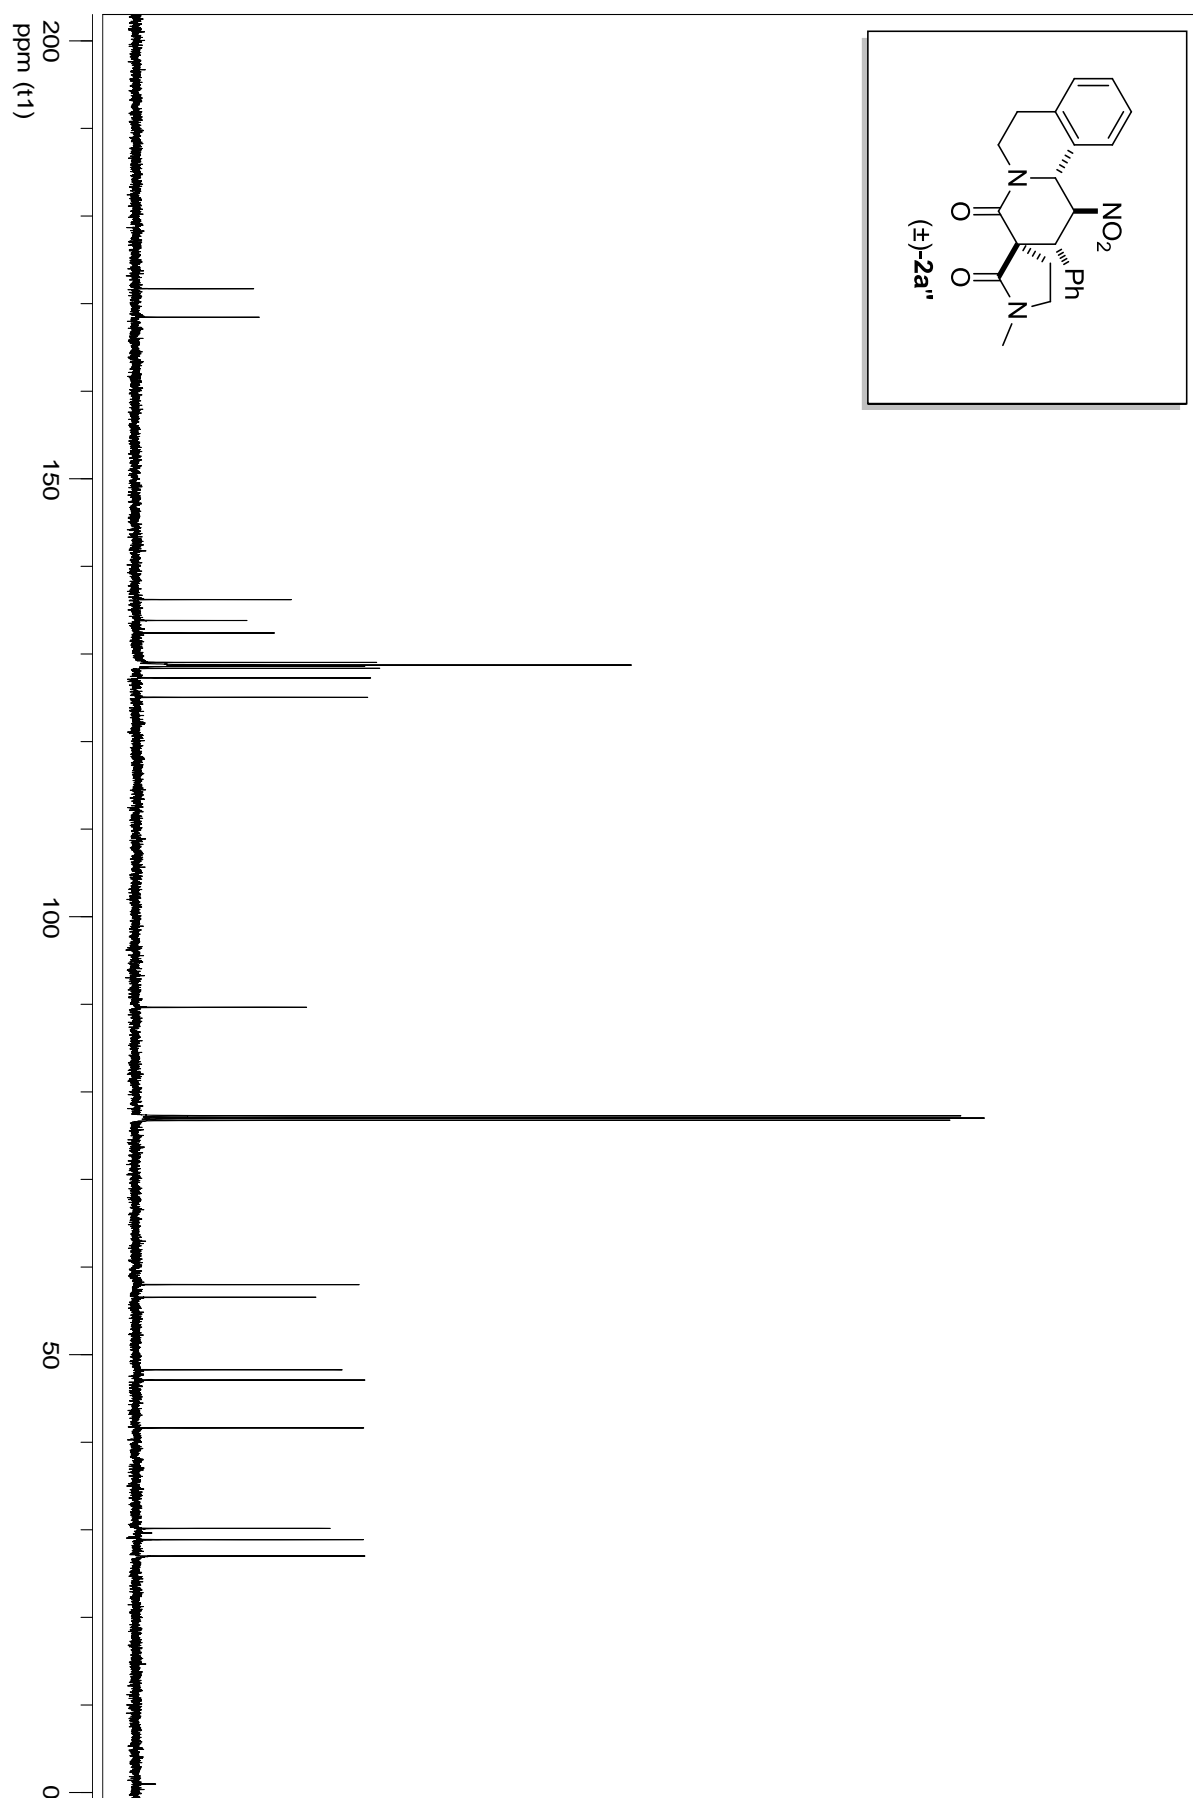

### 5.17. $^1\text{H}$ NMR spectra of 2m

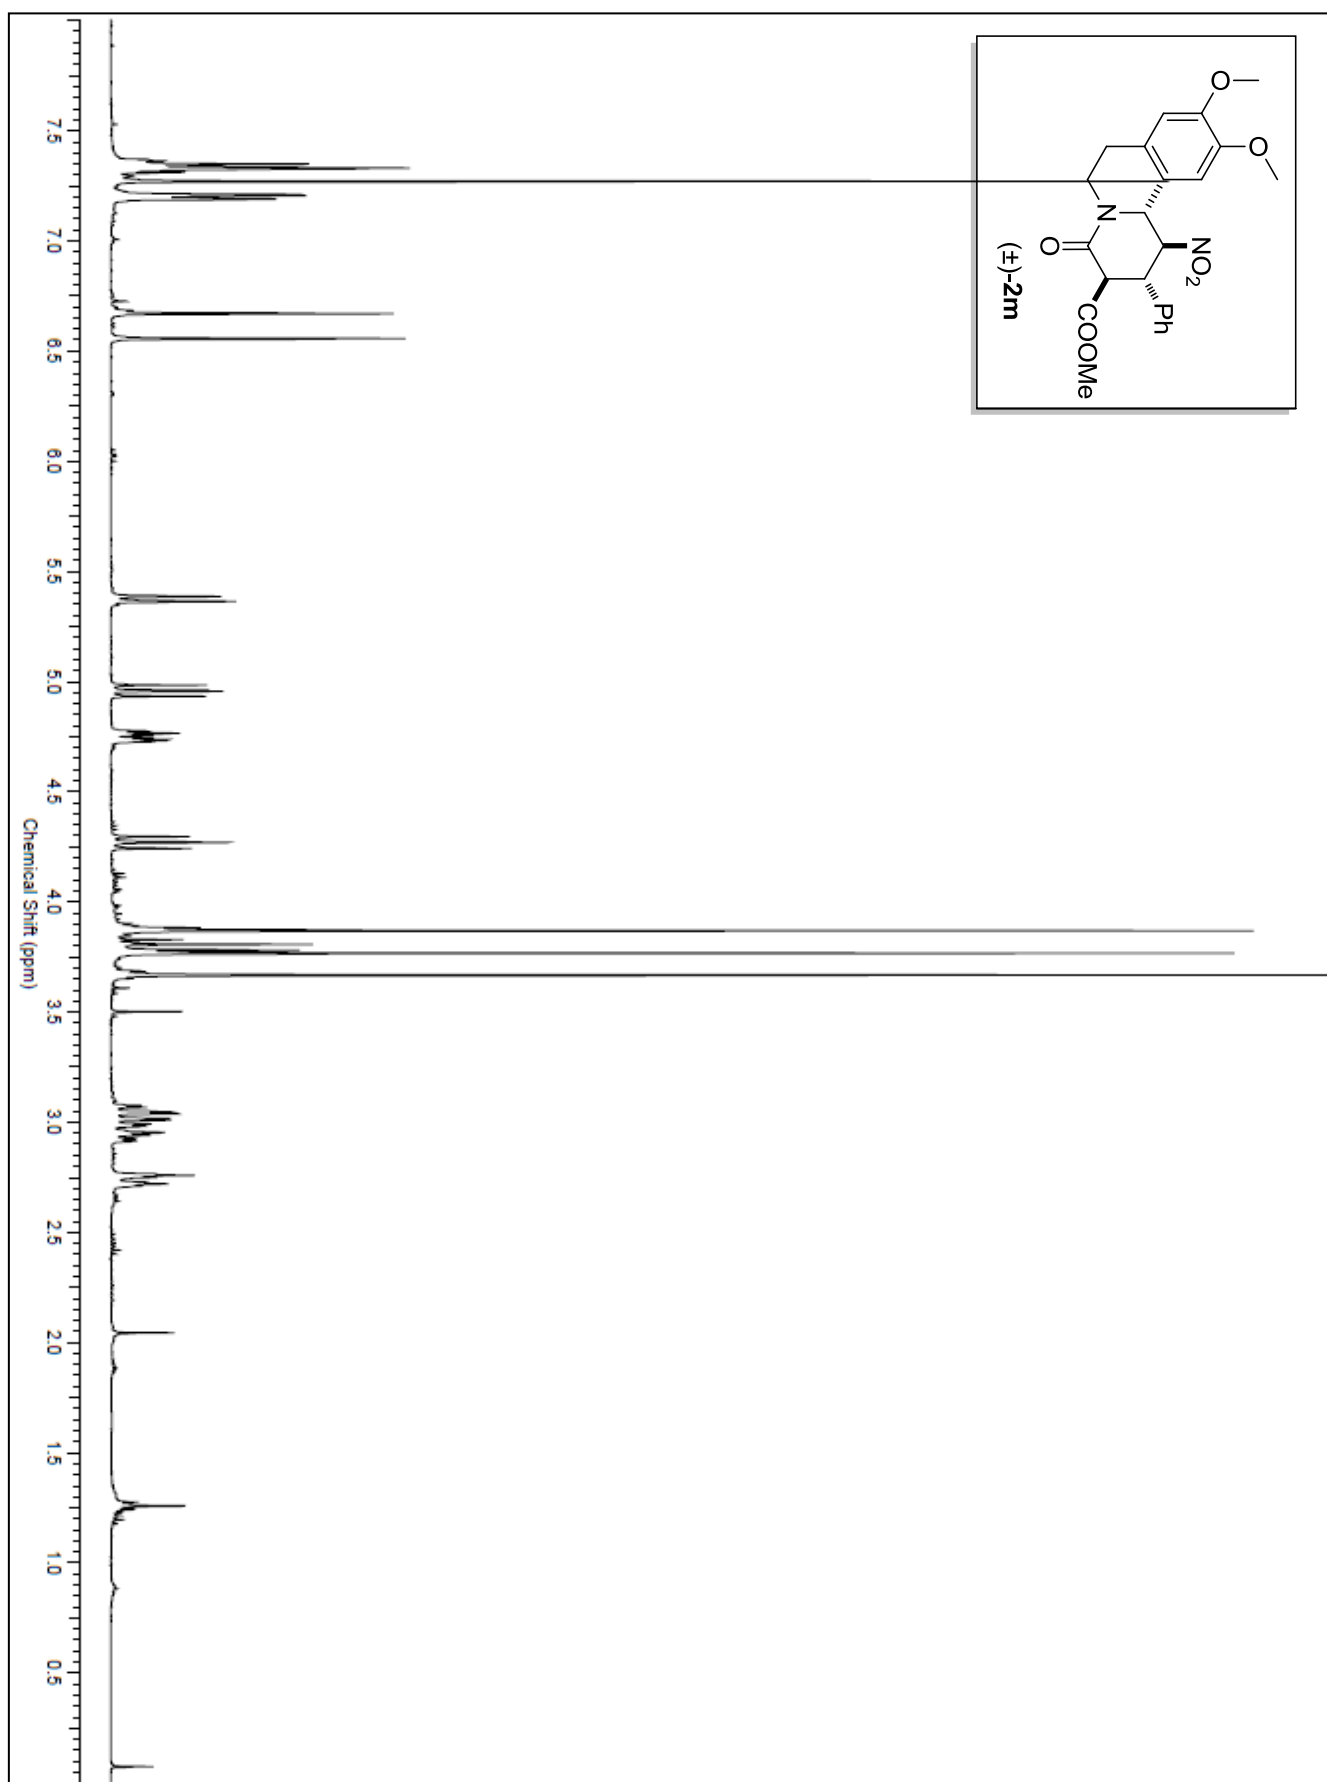

# 5.17. $^{13}\text{C}$ NMR spectra of 2m

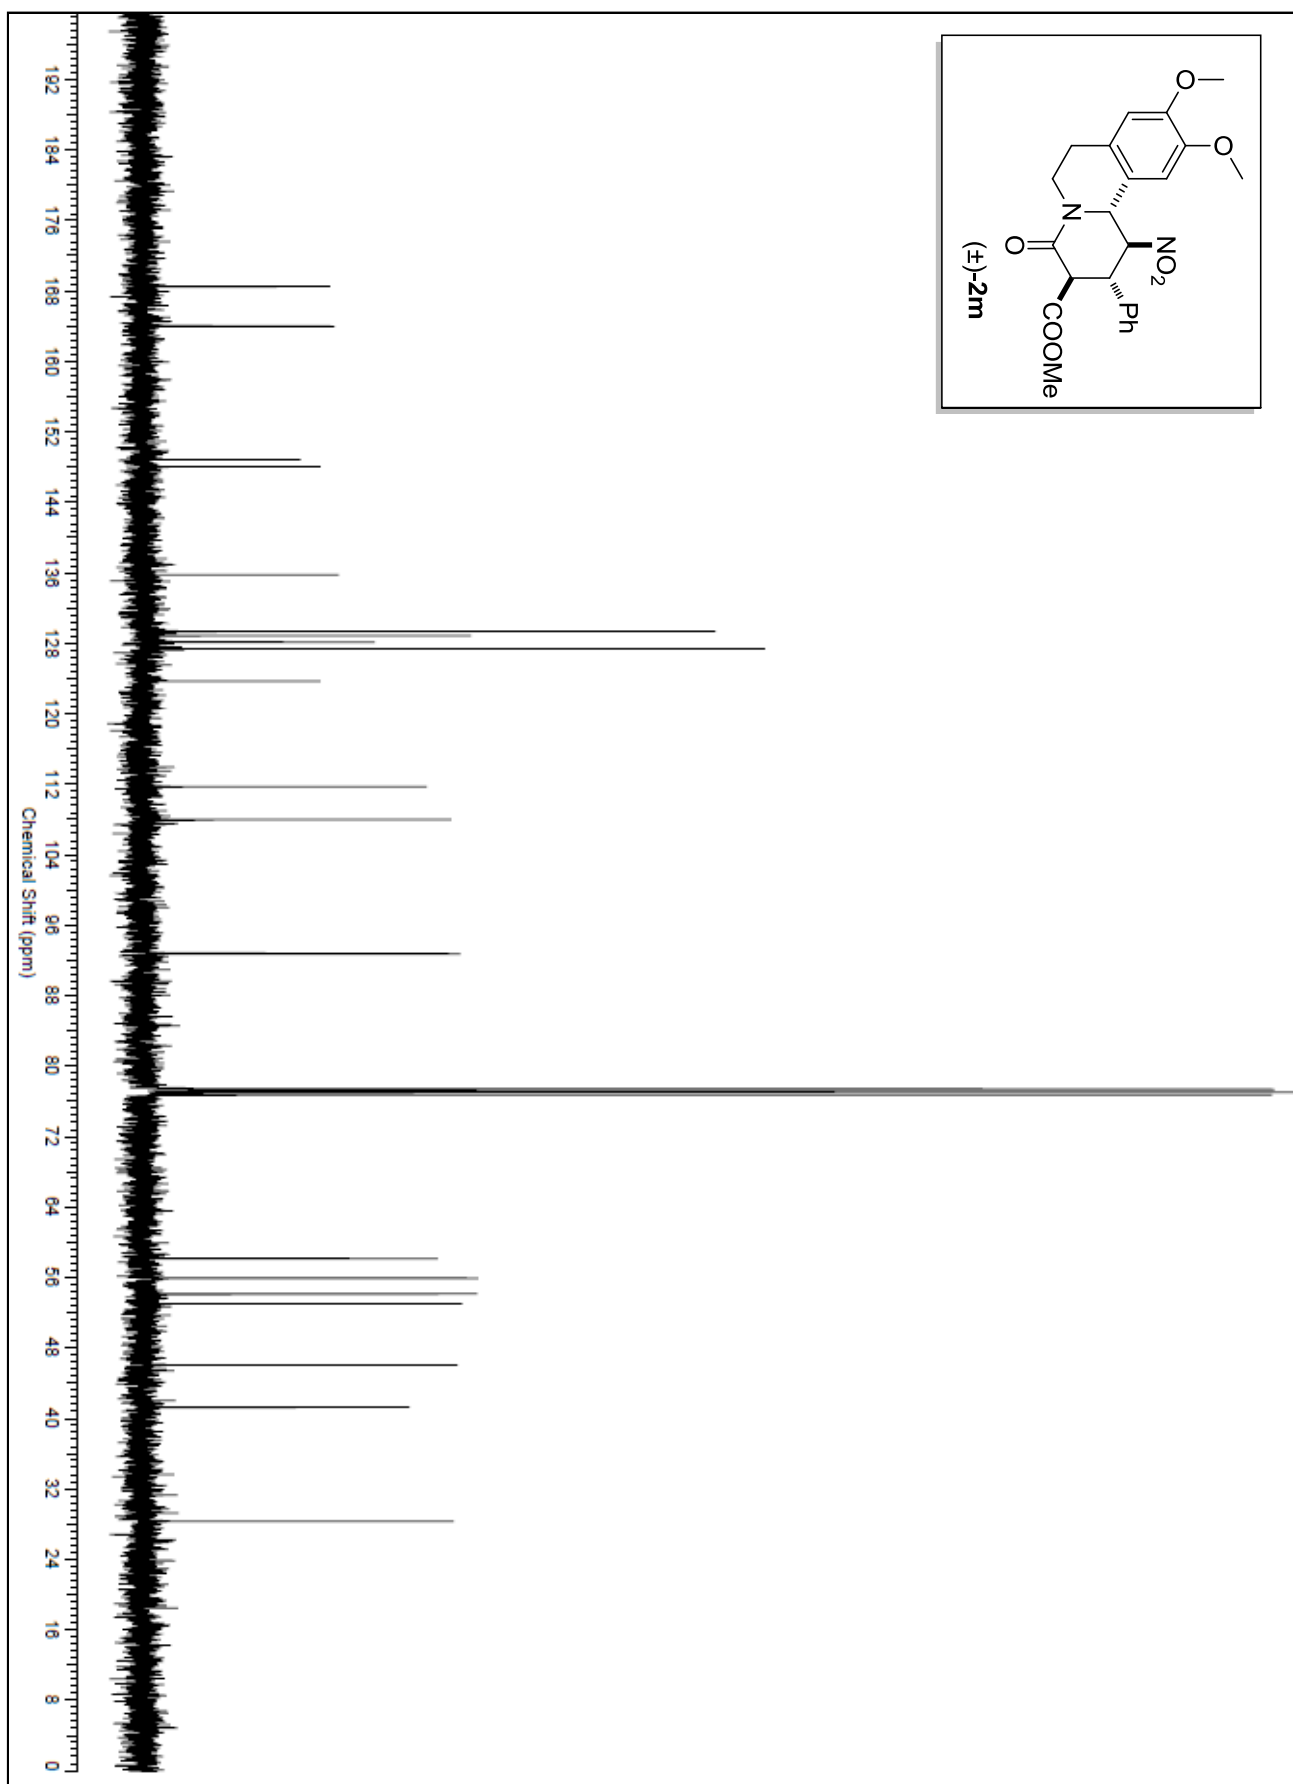

# 5.18. $^1\text{H}$ NMR spectra of 2m'

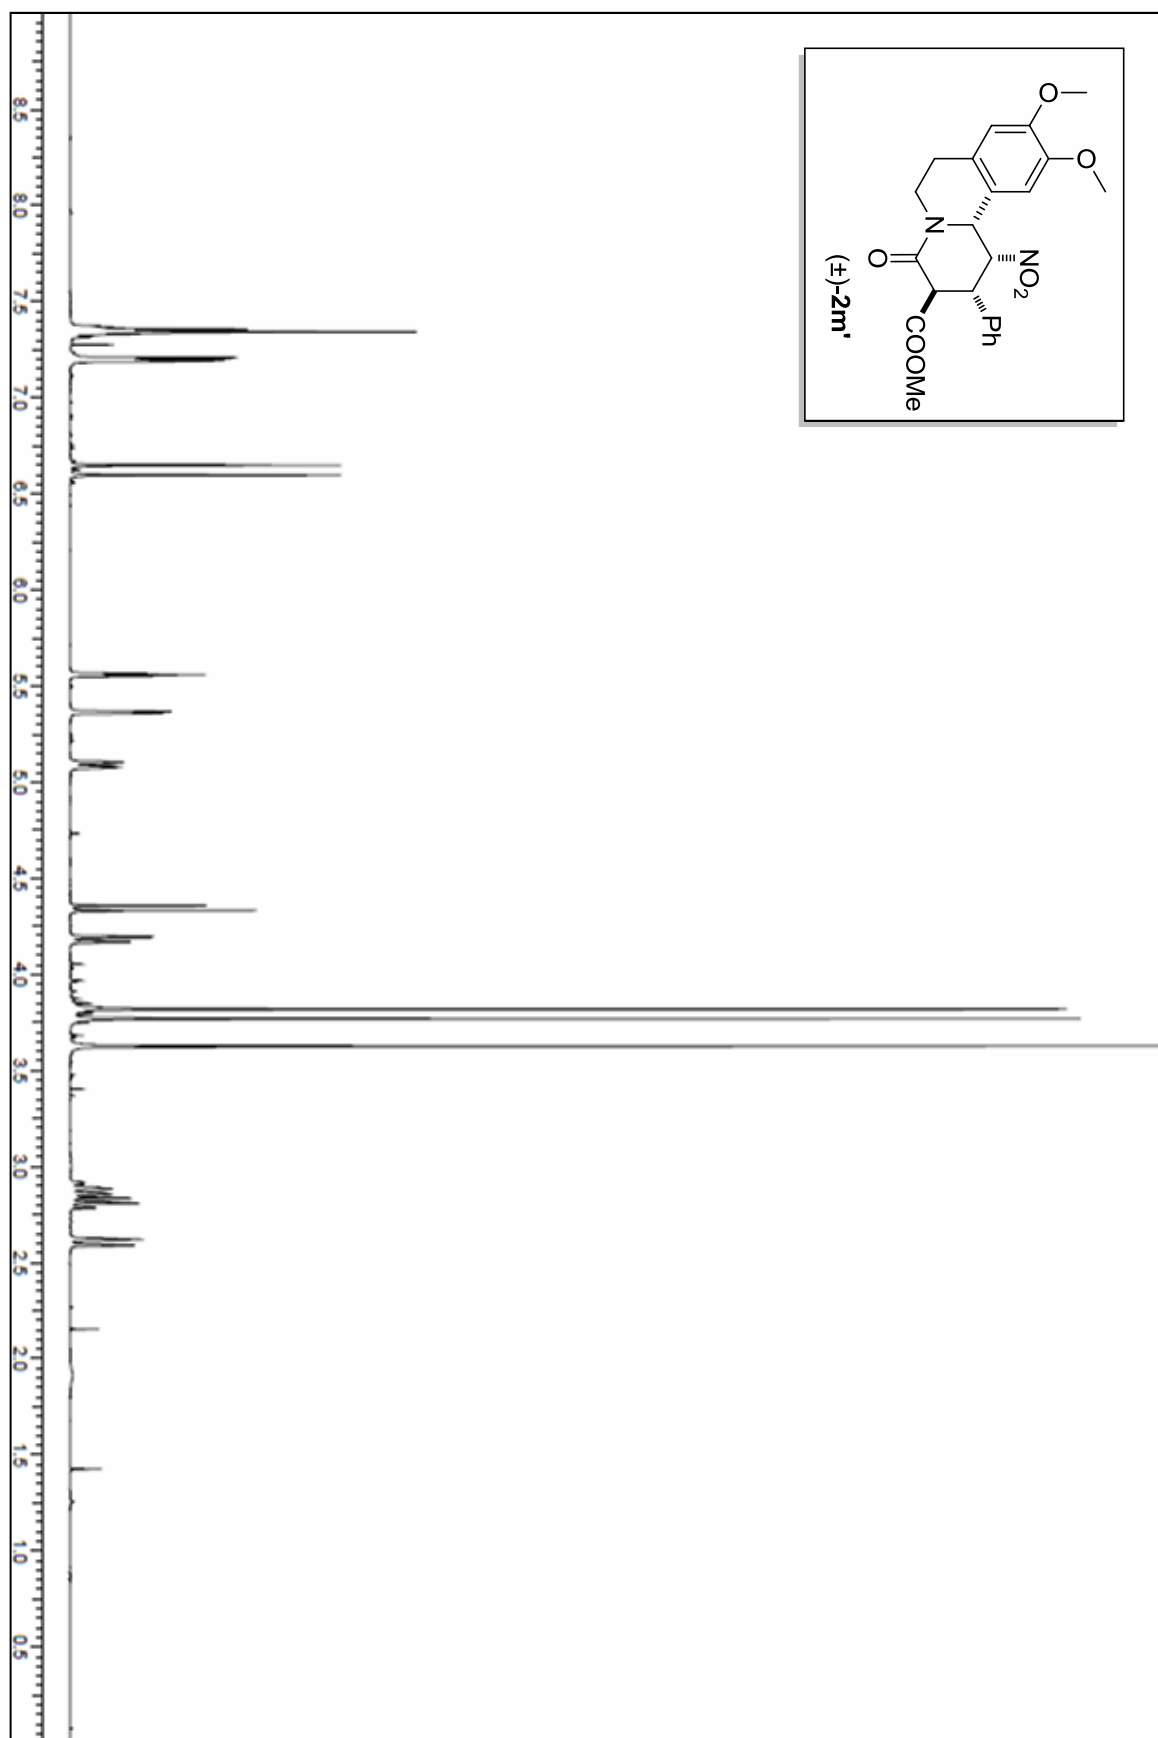

# 5.18. $^1\text{H}$ NMR spectra of 2m'

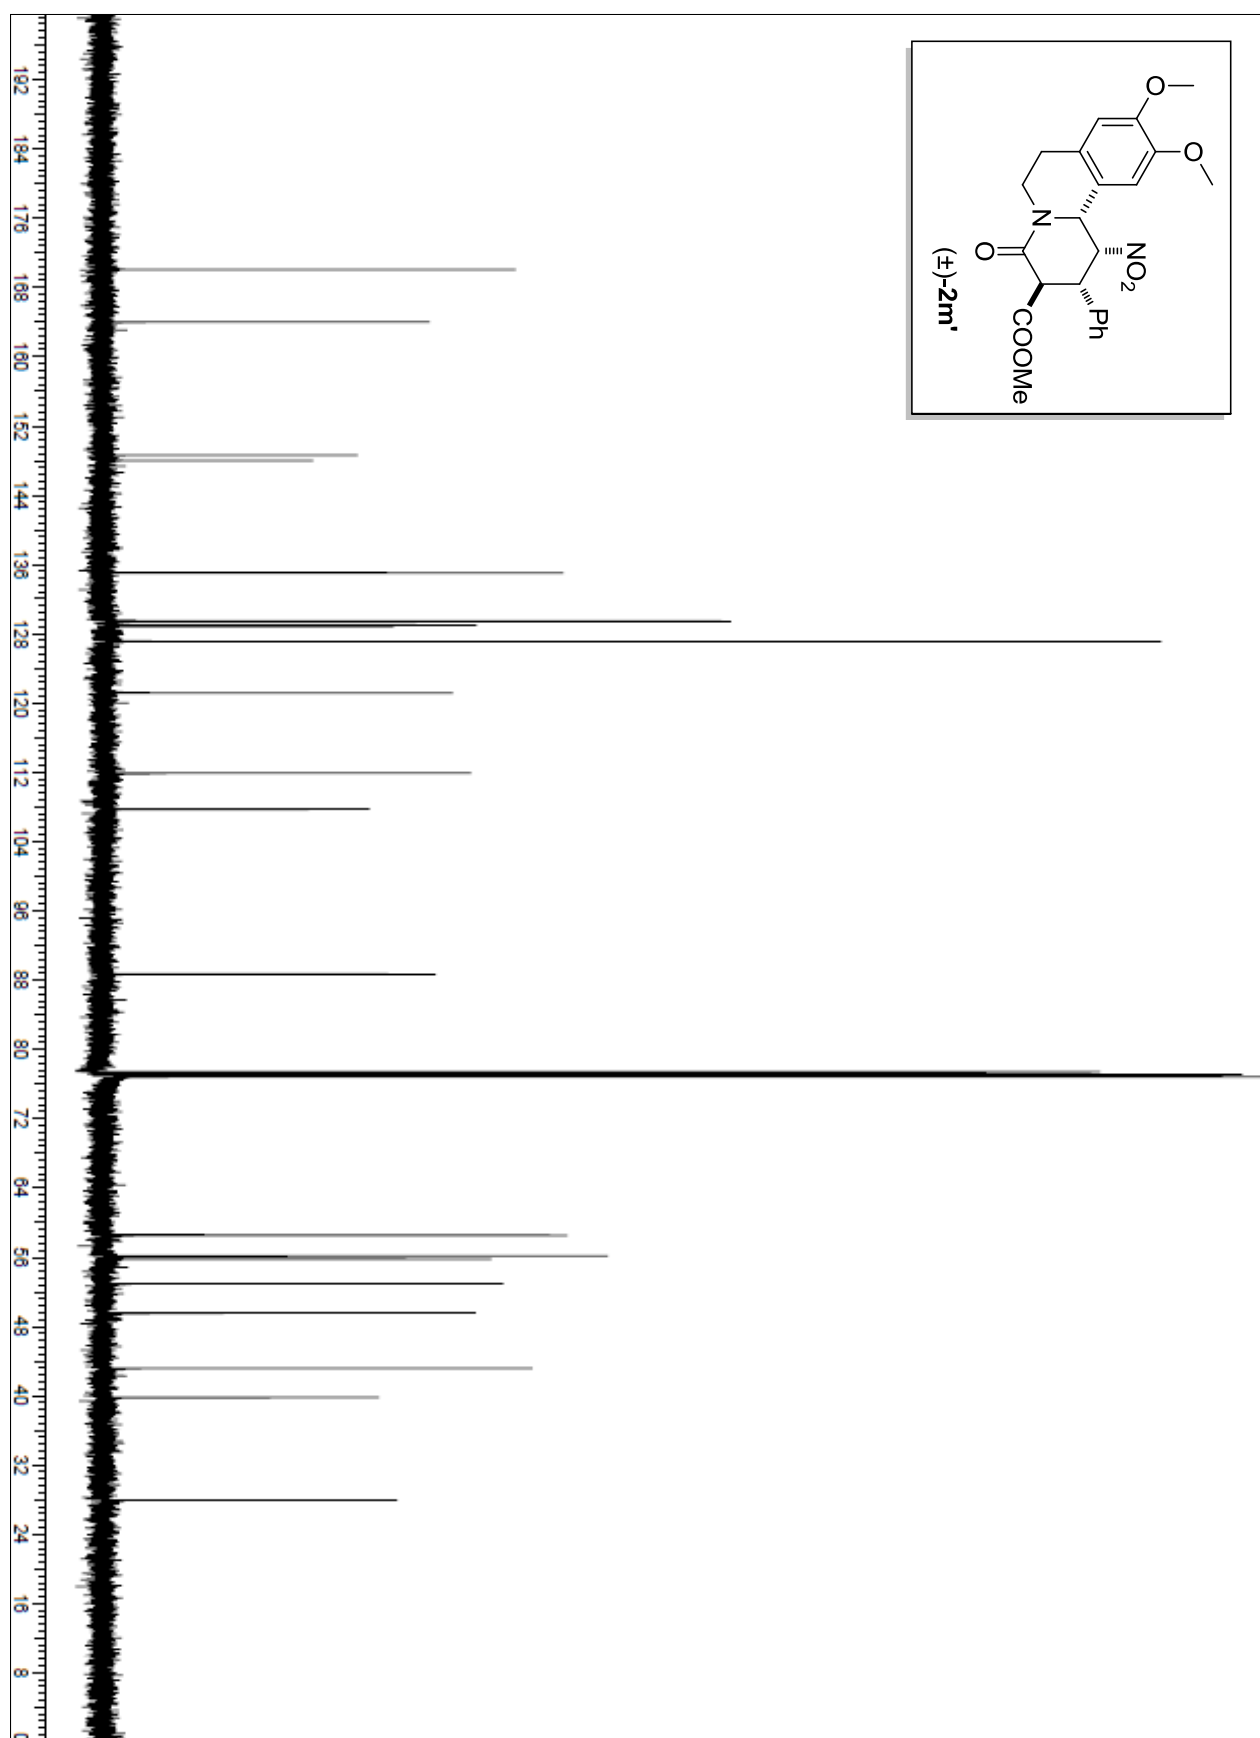

### 5.19. $^1\text{H}$ NMR spectra of 10a

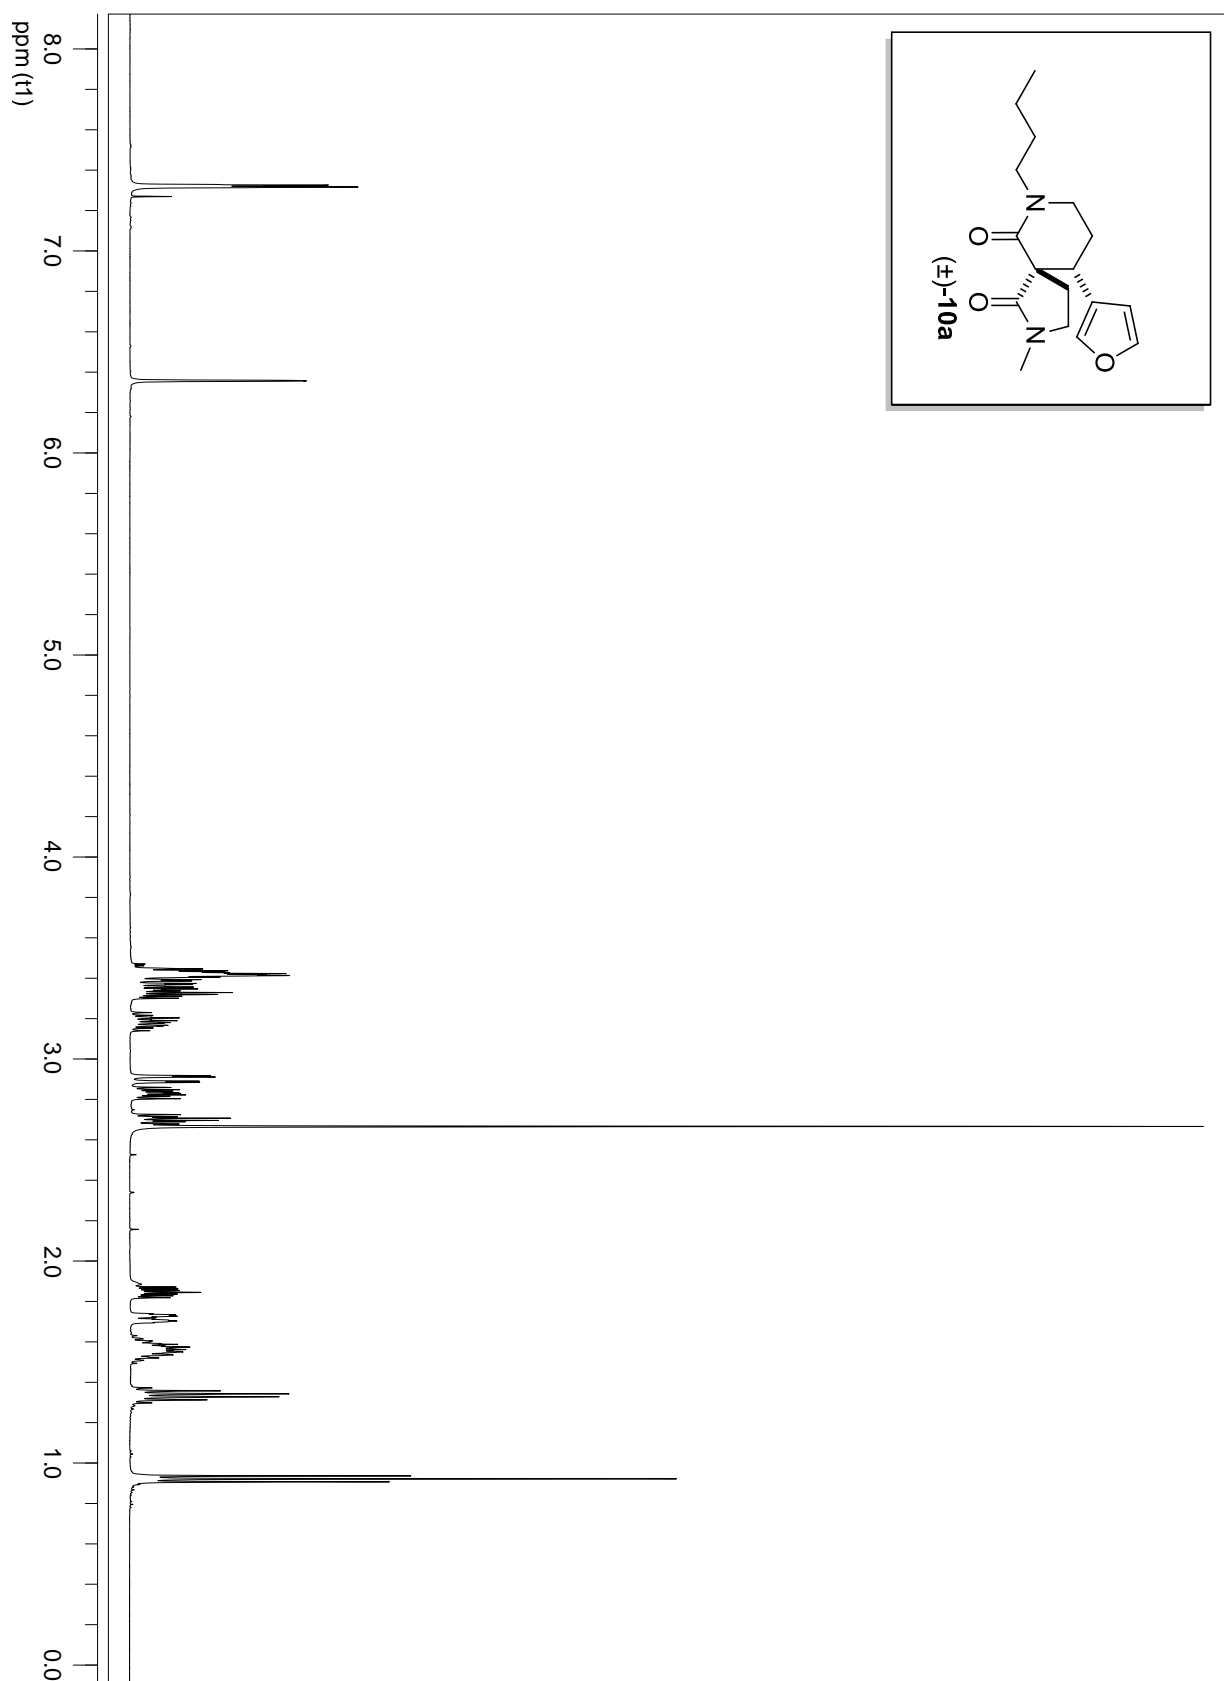

## 5.19 $^{13}\text{C}$ NMR spectra of 10a

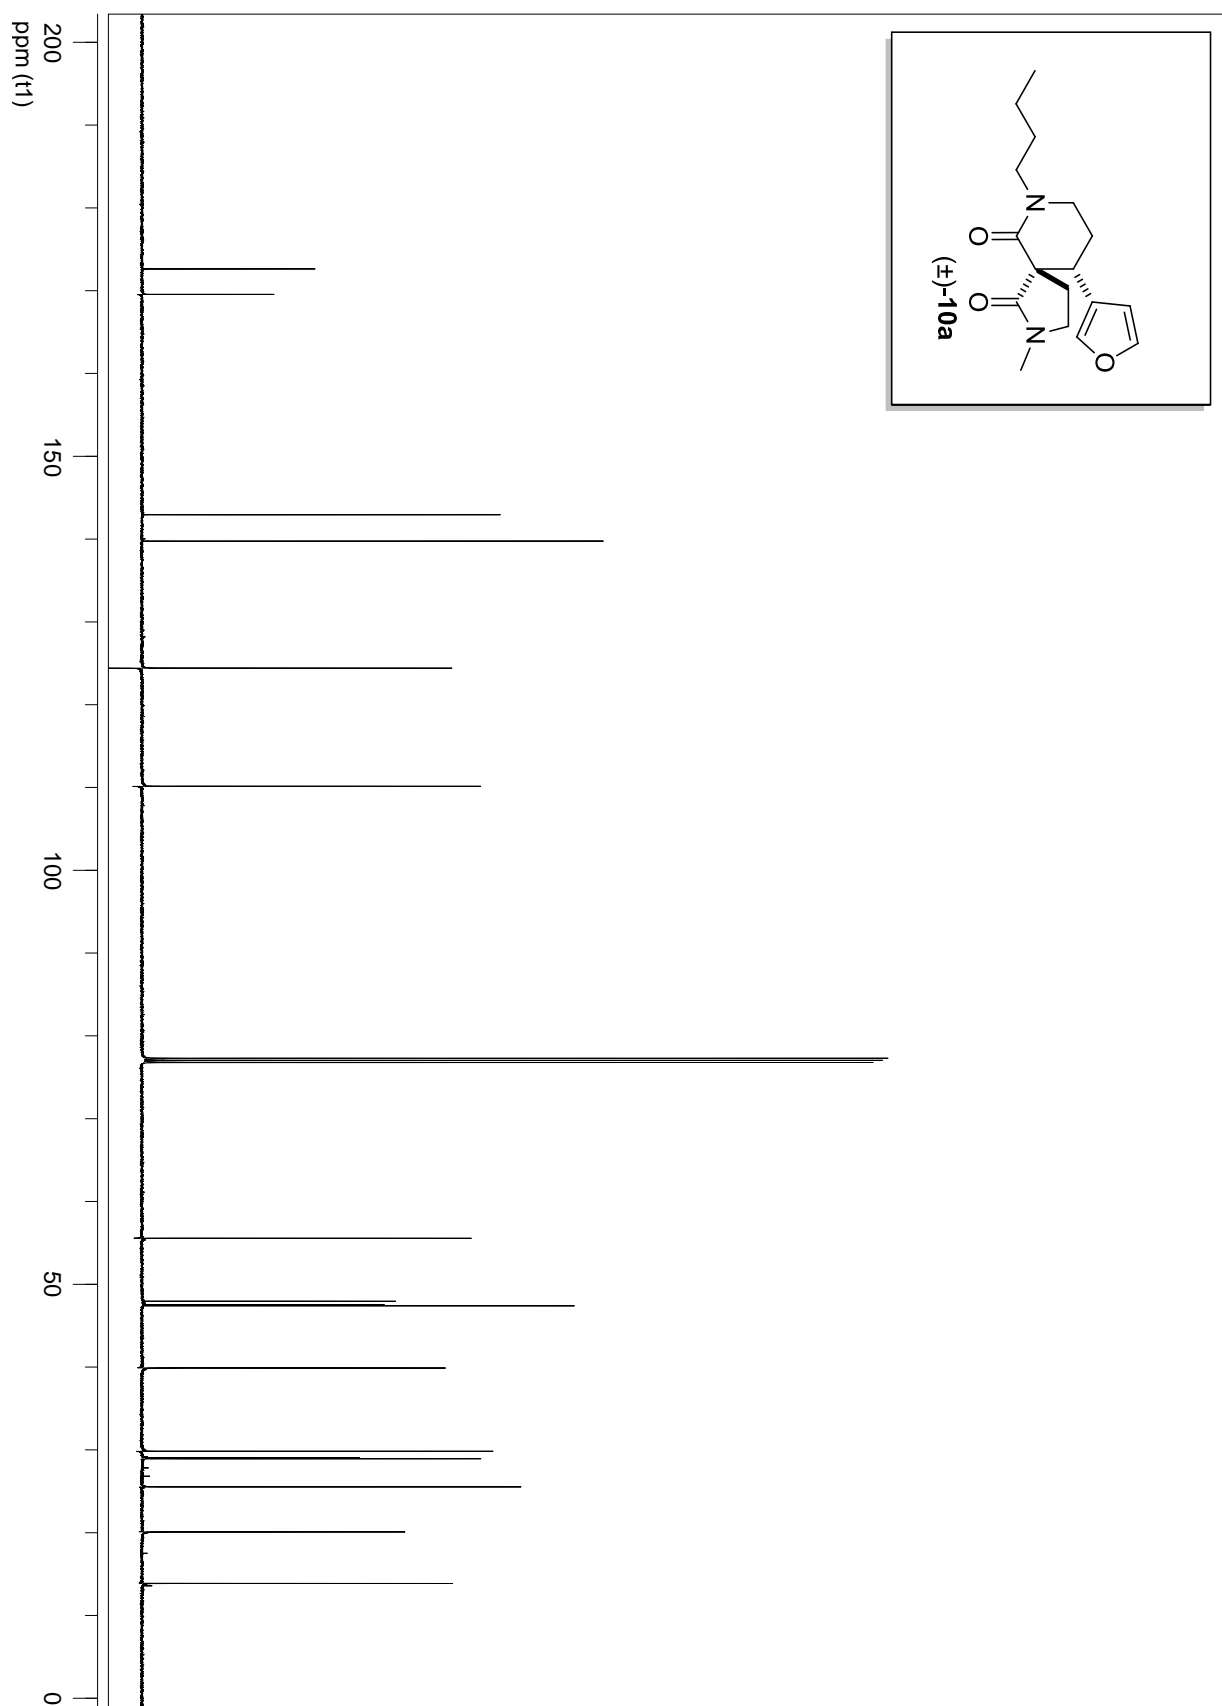

## 5.20. $^1\text{H}$ NMR spectra of 10b

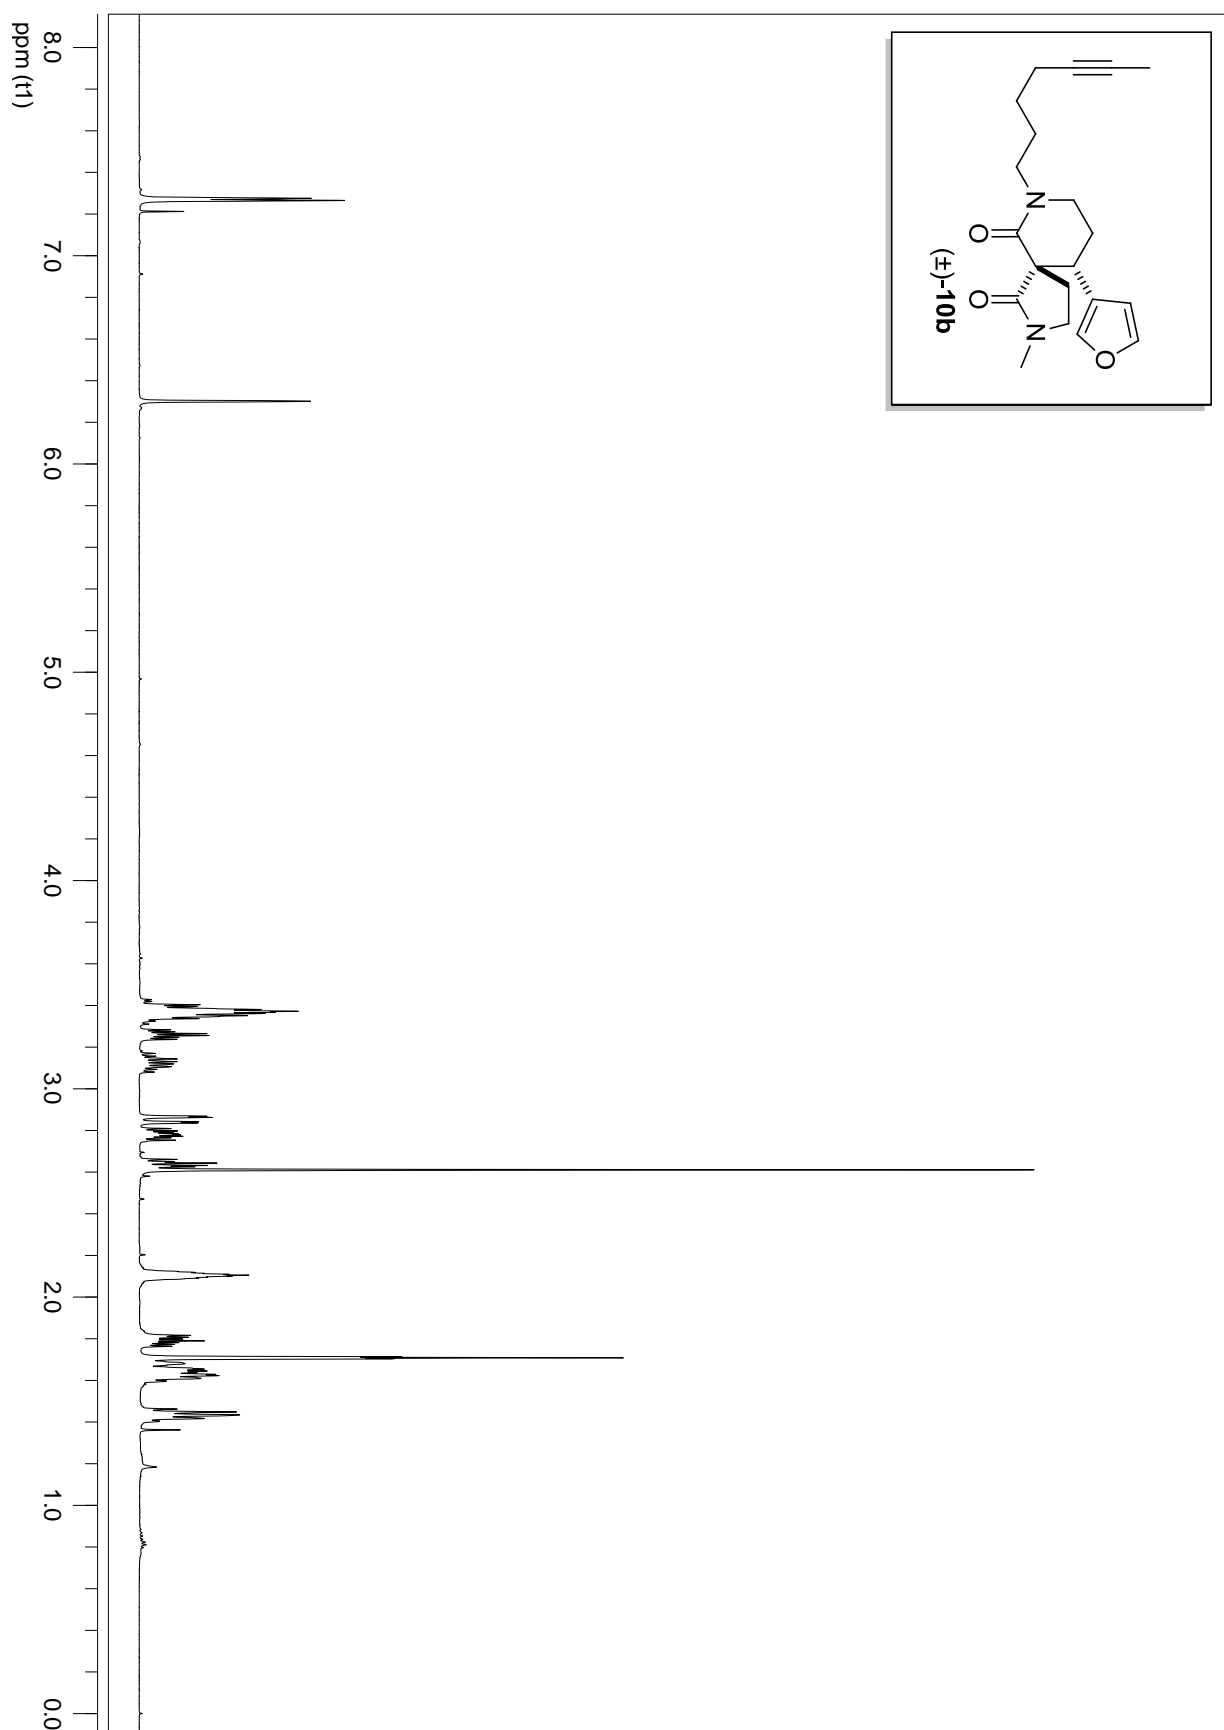



5.20.  $^{13}\text{C}$  NMR spectra of 10b

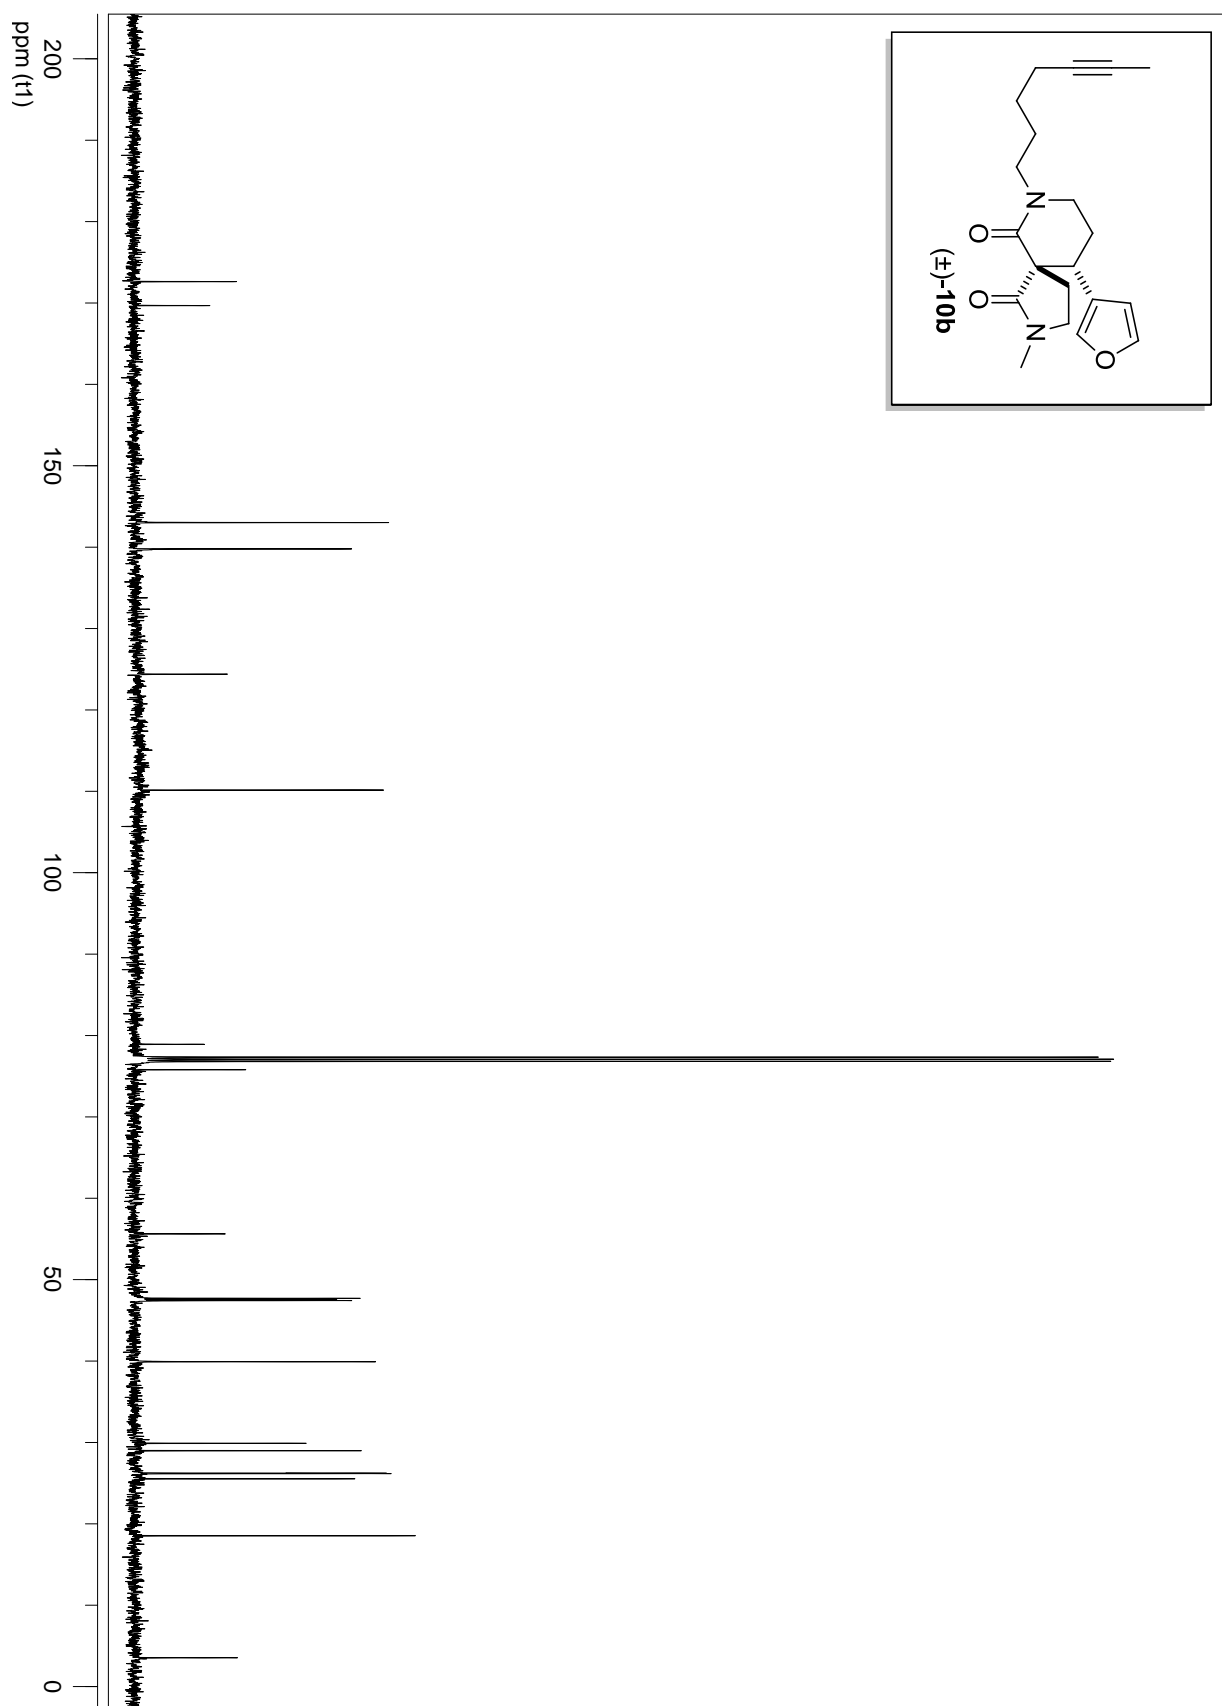

### 5.21. $^1\text{H}$ NMR spectra of 10c

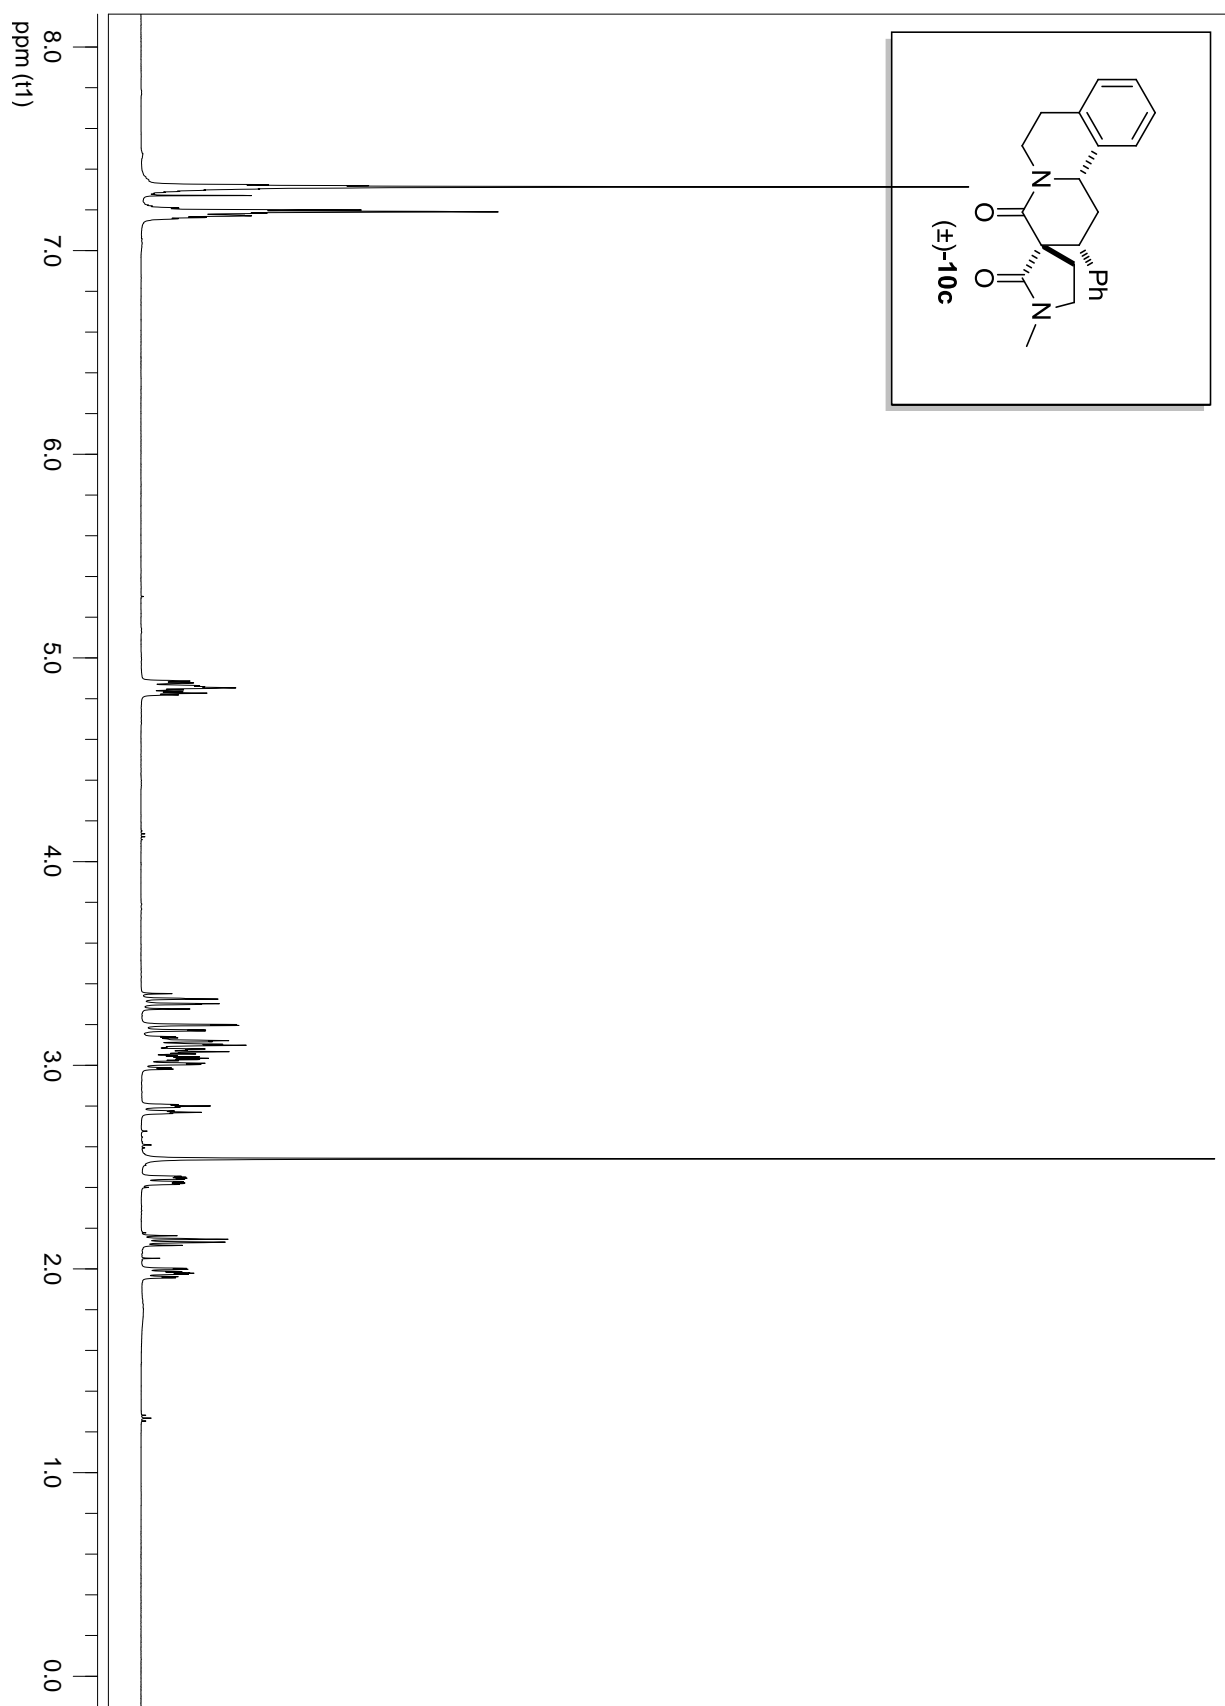

### 5.21. $^{13}\text{C}$ NMR spectra of 10c

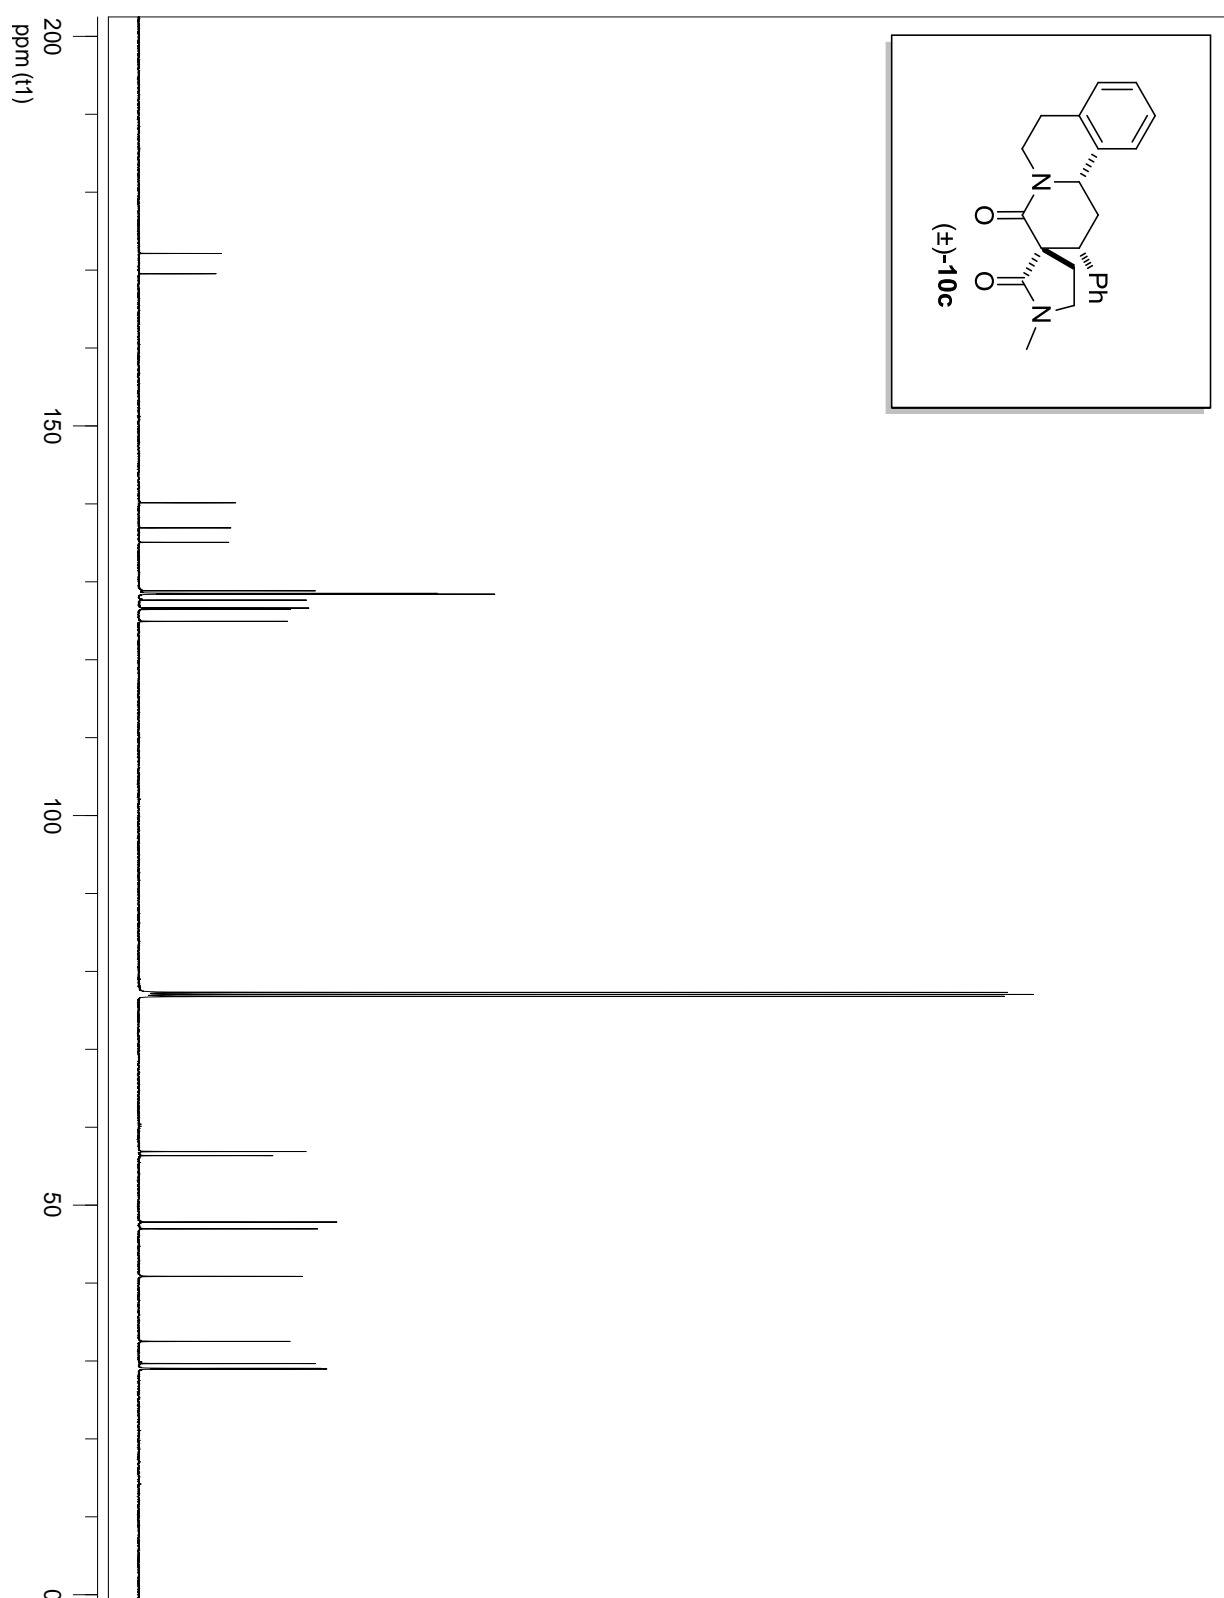

## 5.22. $^1\text{H}$ NMR spectra of 10d

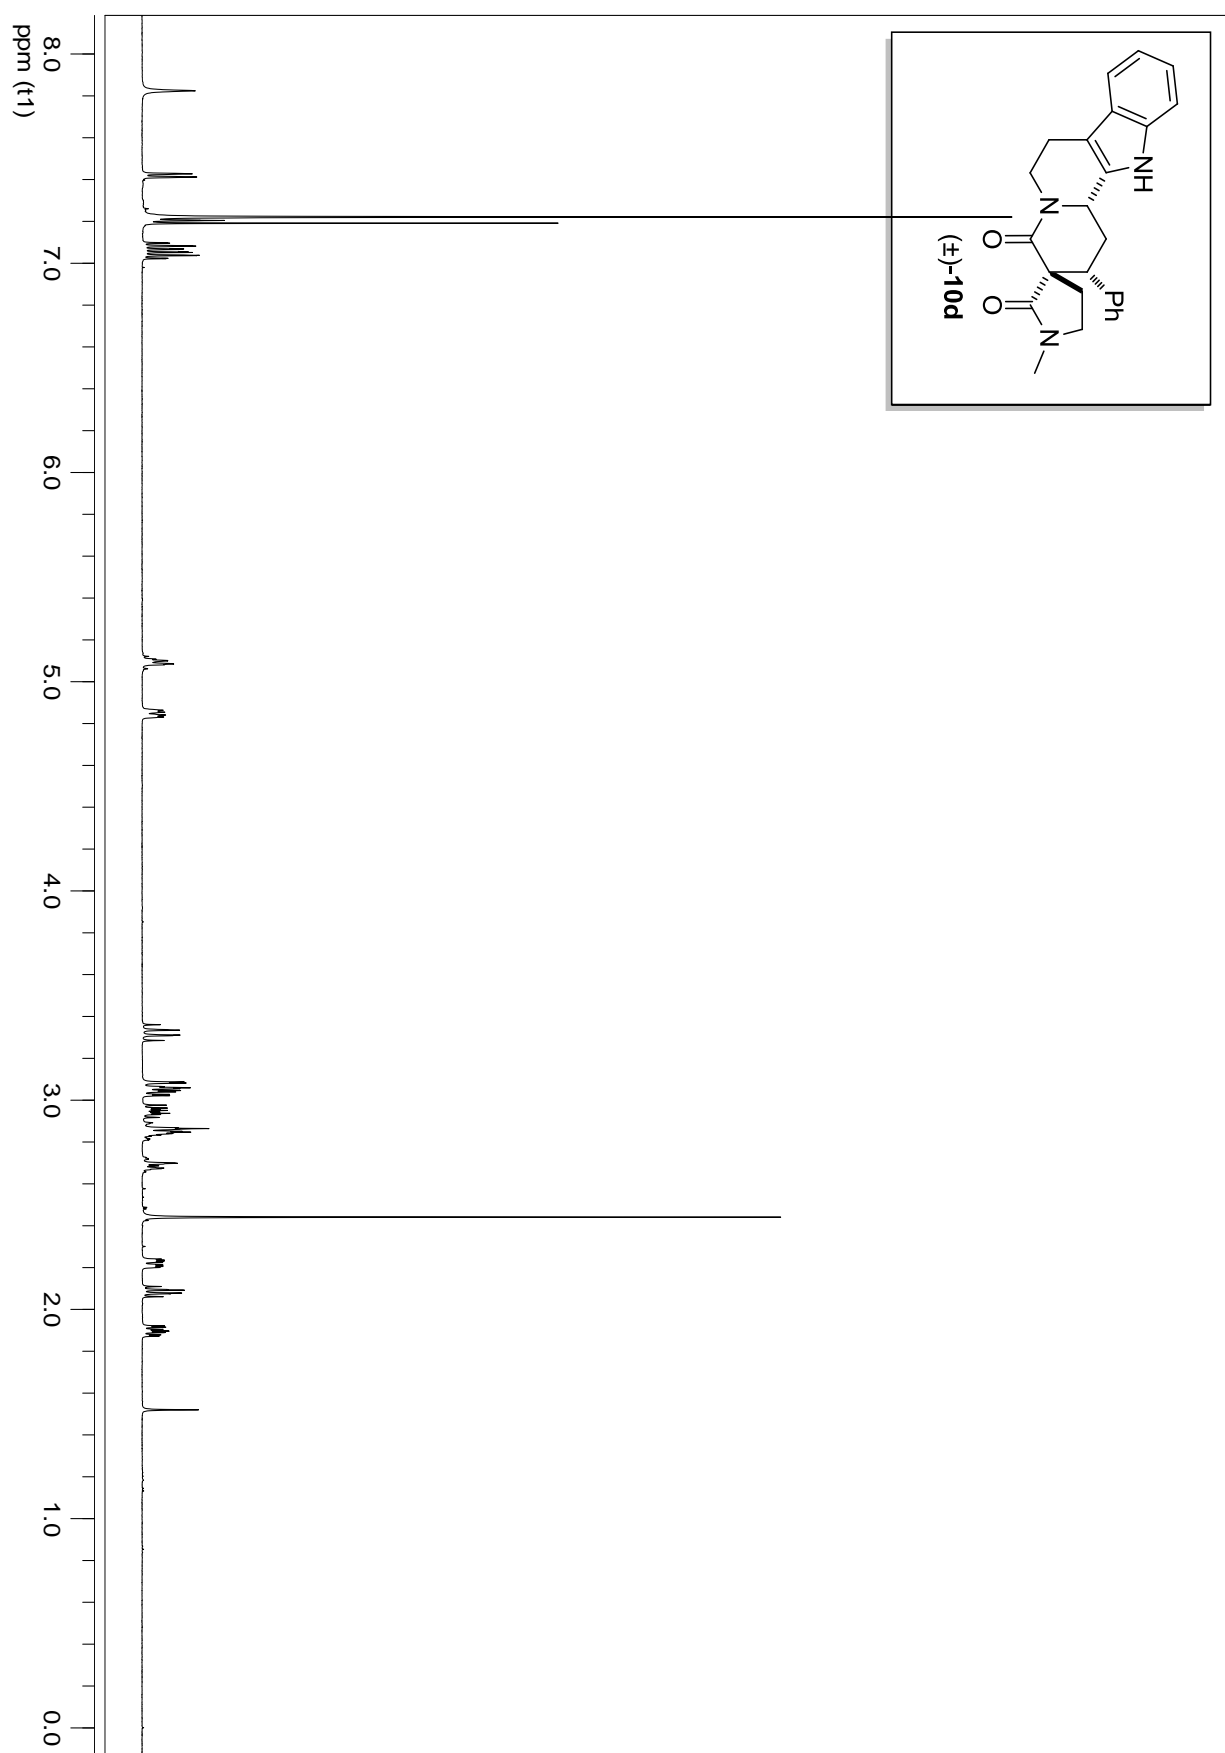

## 5.22. $^{13}\text{C}$ NMR spectra of 10d

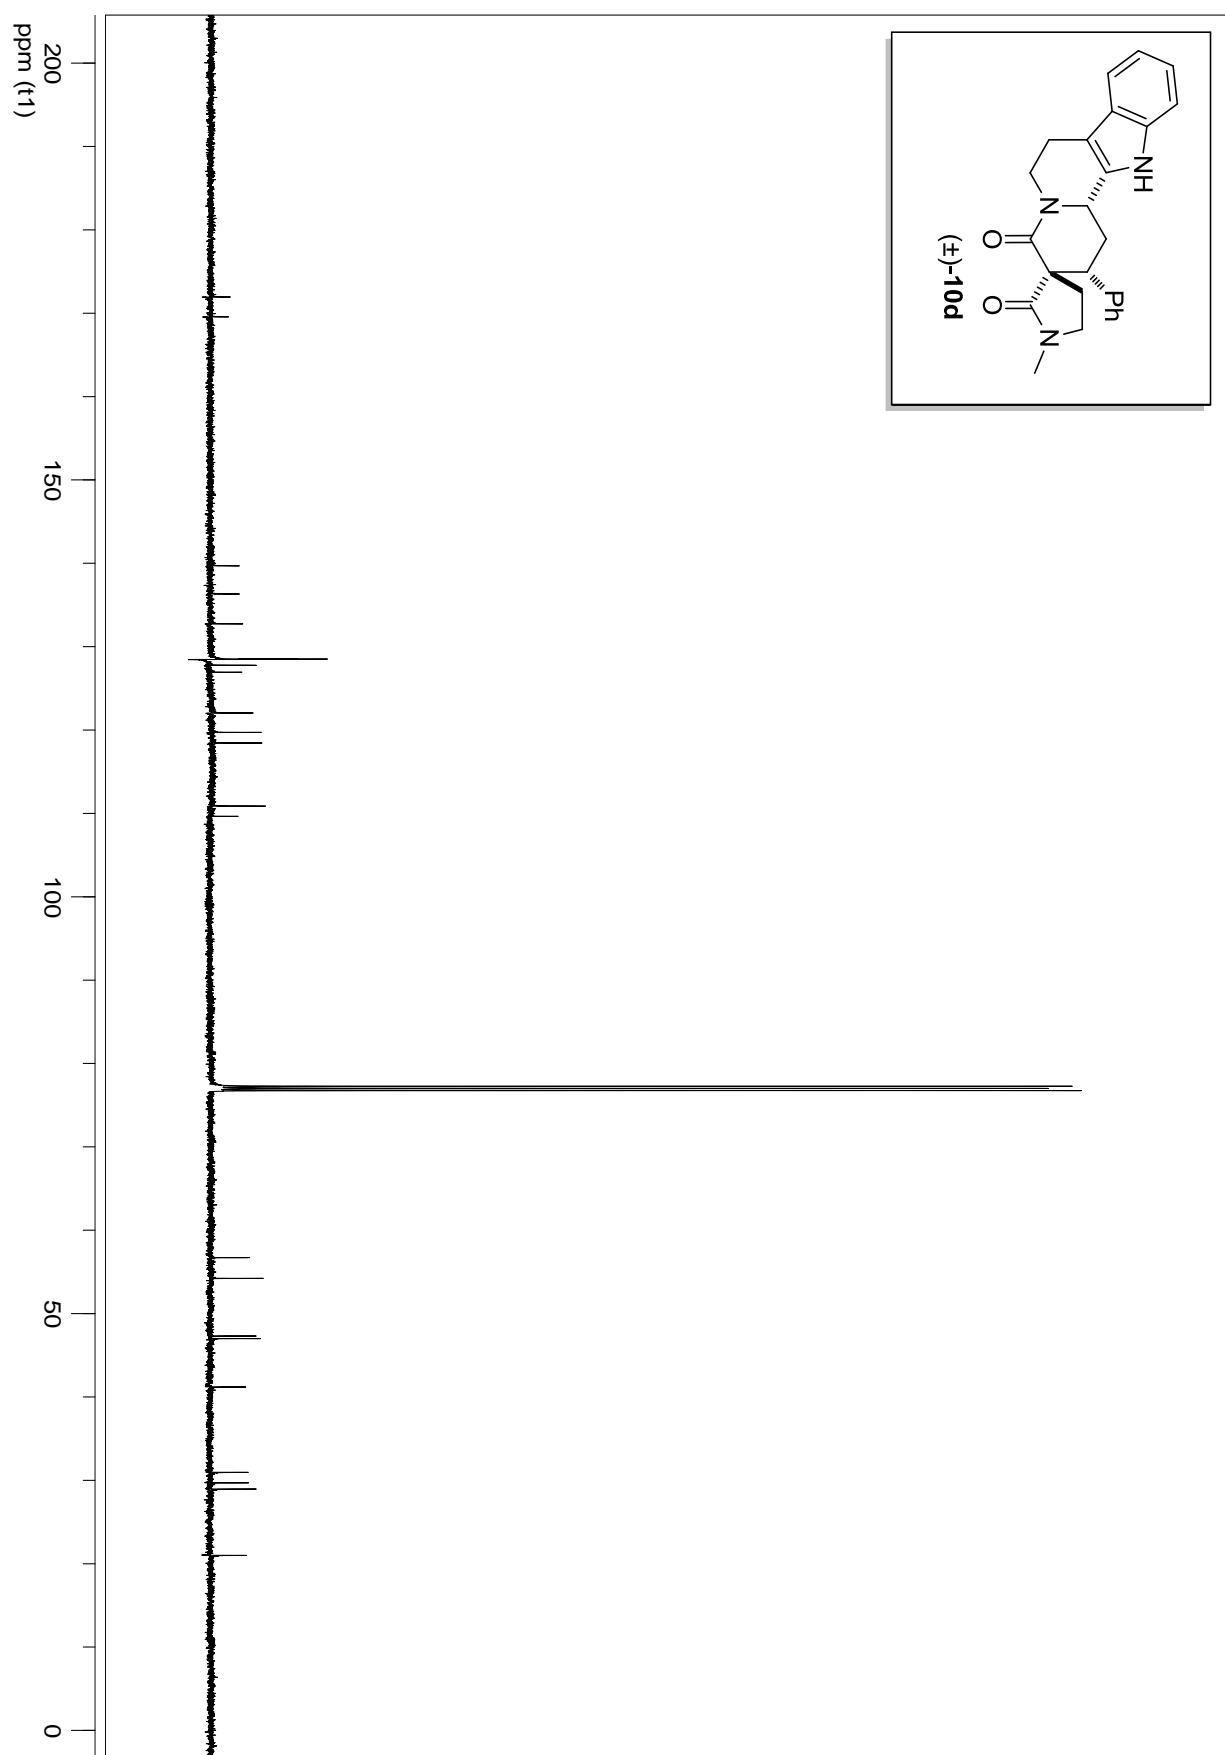

### 5.23. $^1\text{H}$ NMR spectra of 11a

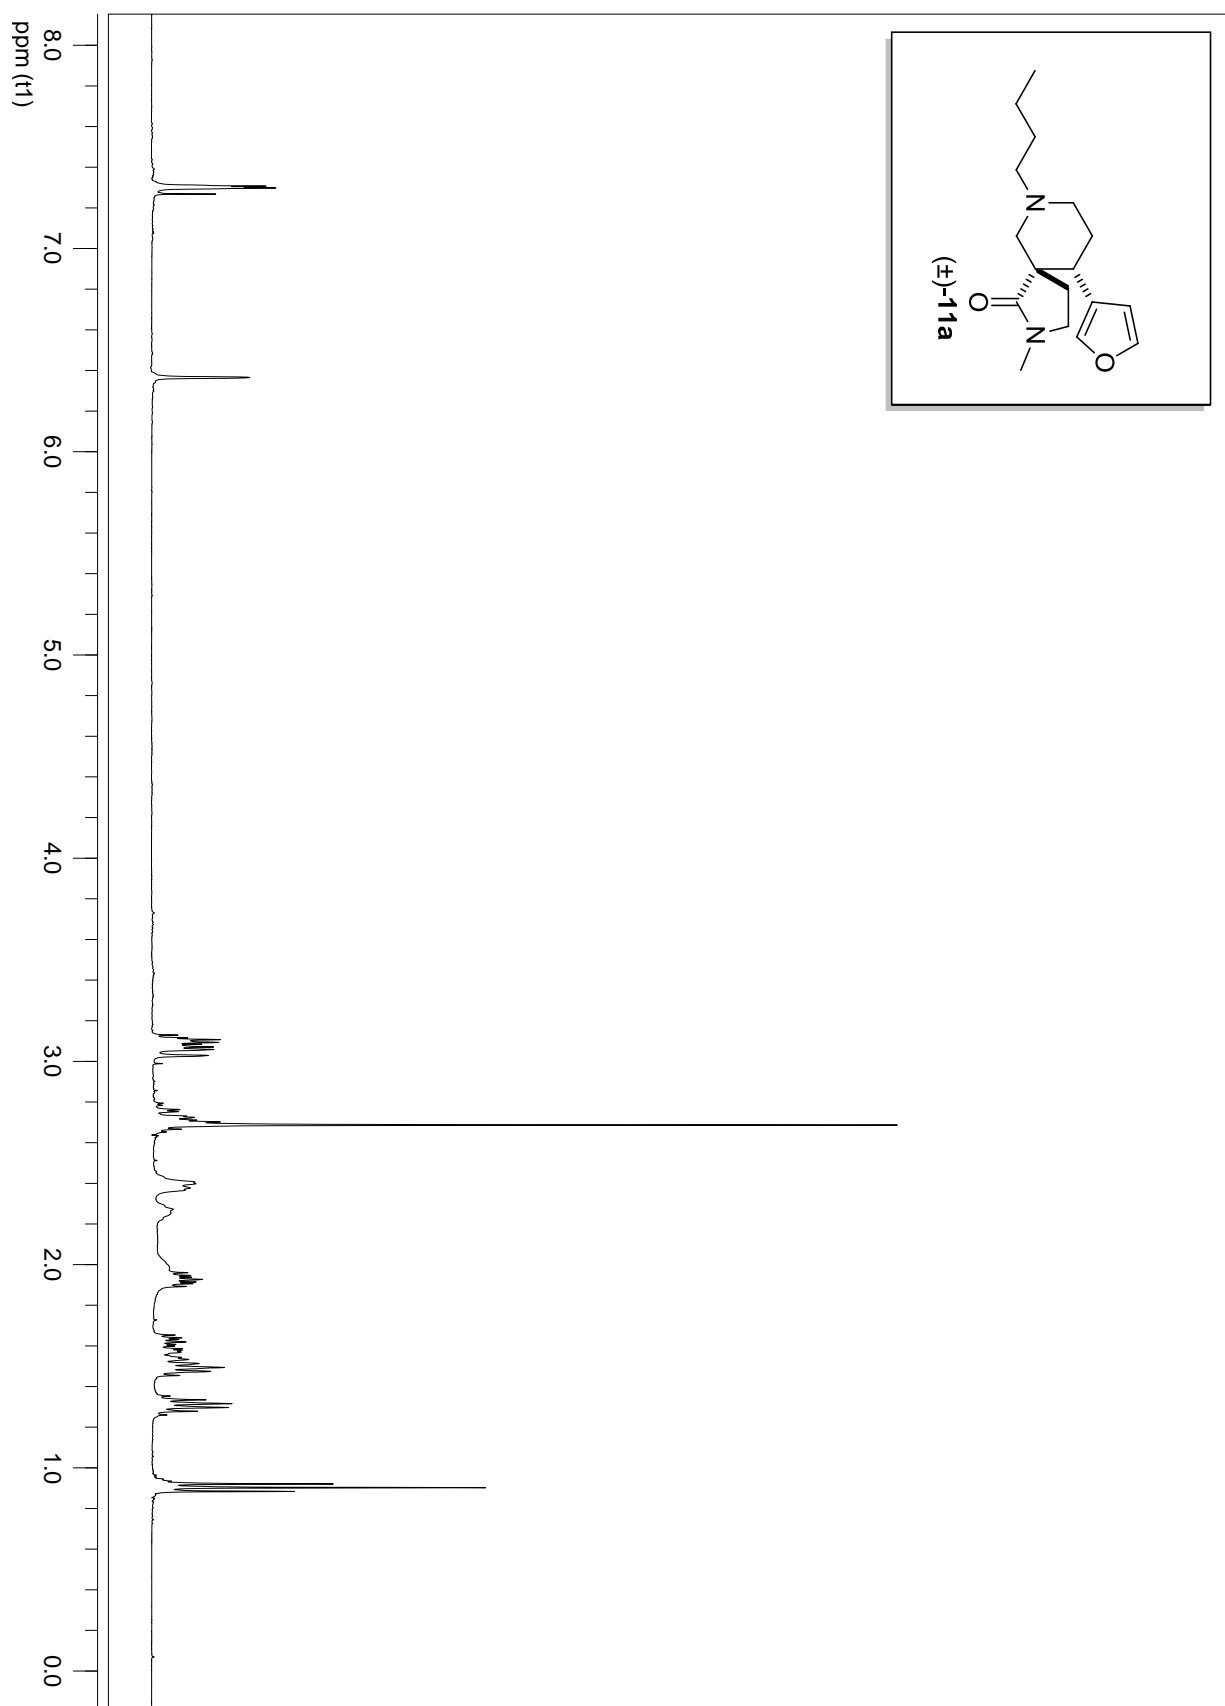

### 5.23. $^{13}\text{C}$ NMR spectra of 11a

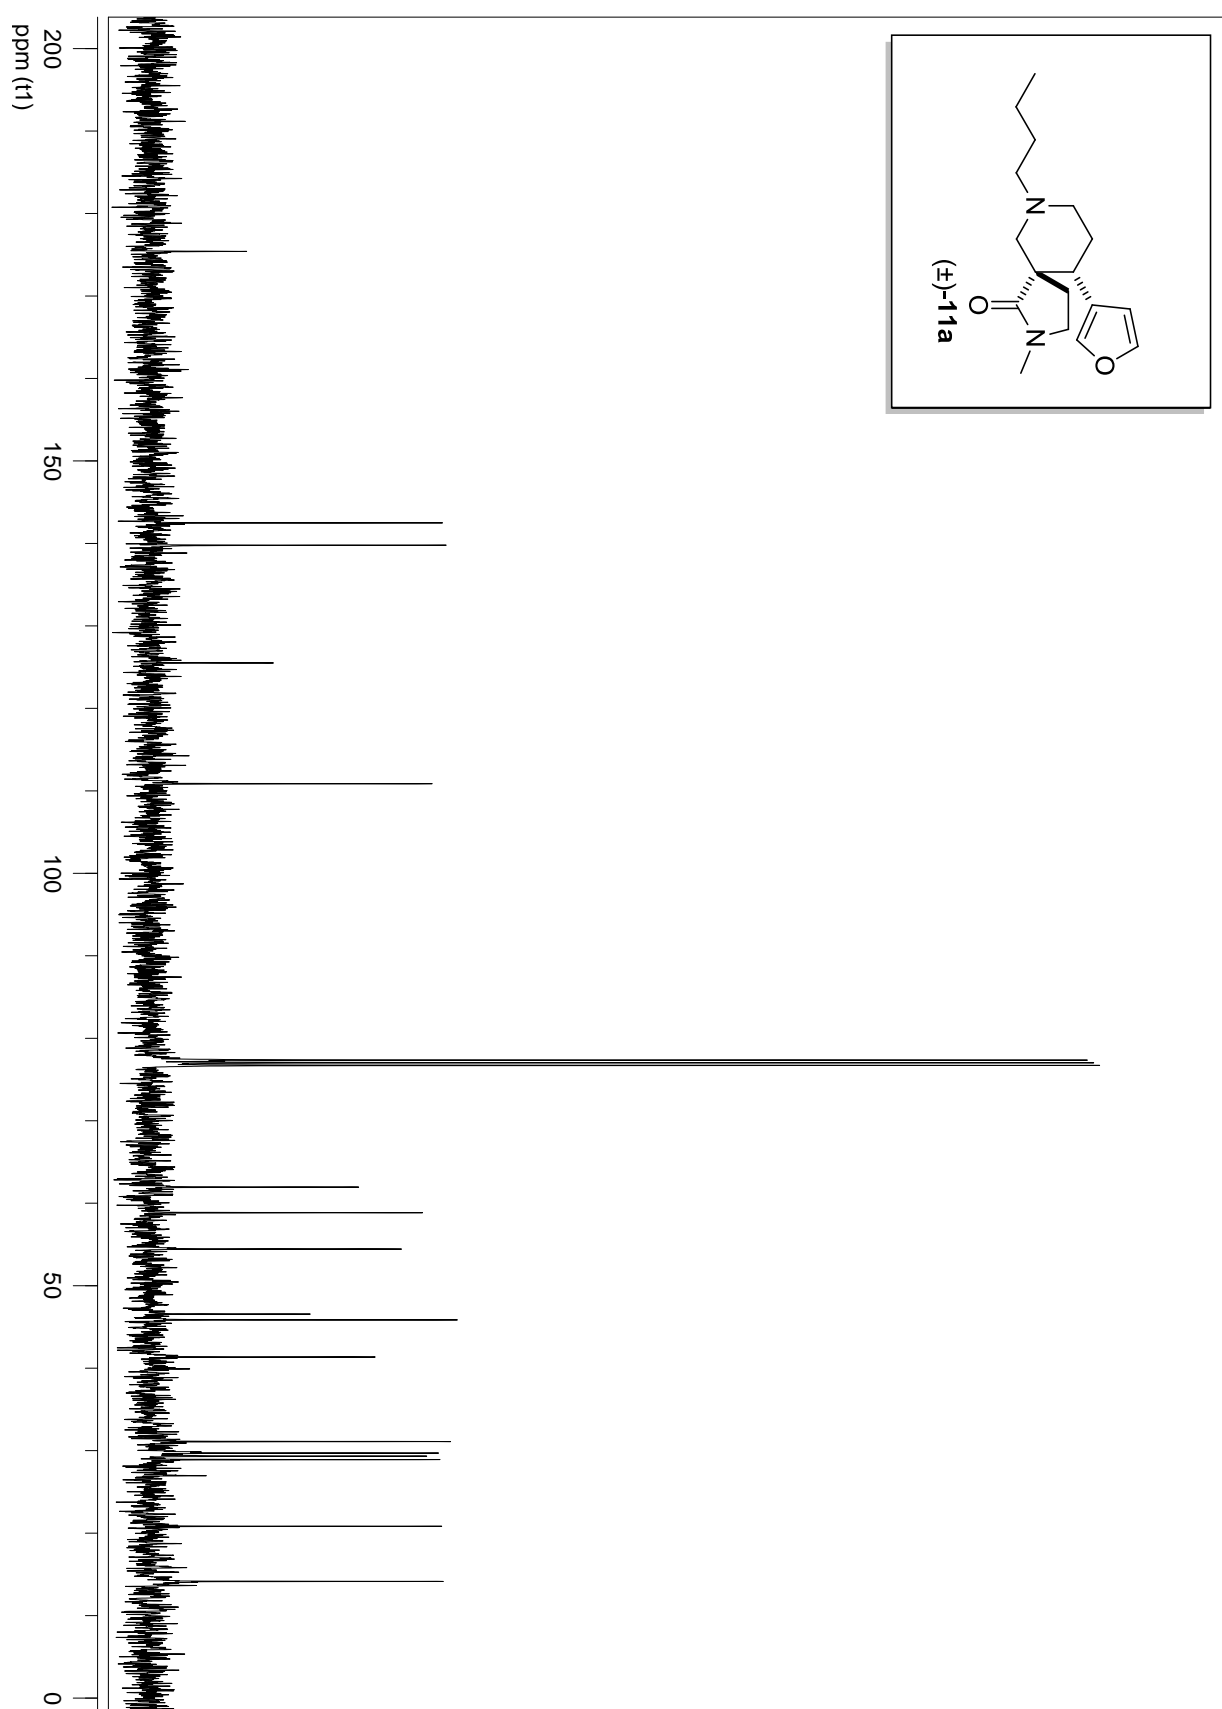

## 5.24. $^1\text{H}$ NMR spectra of 11b

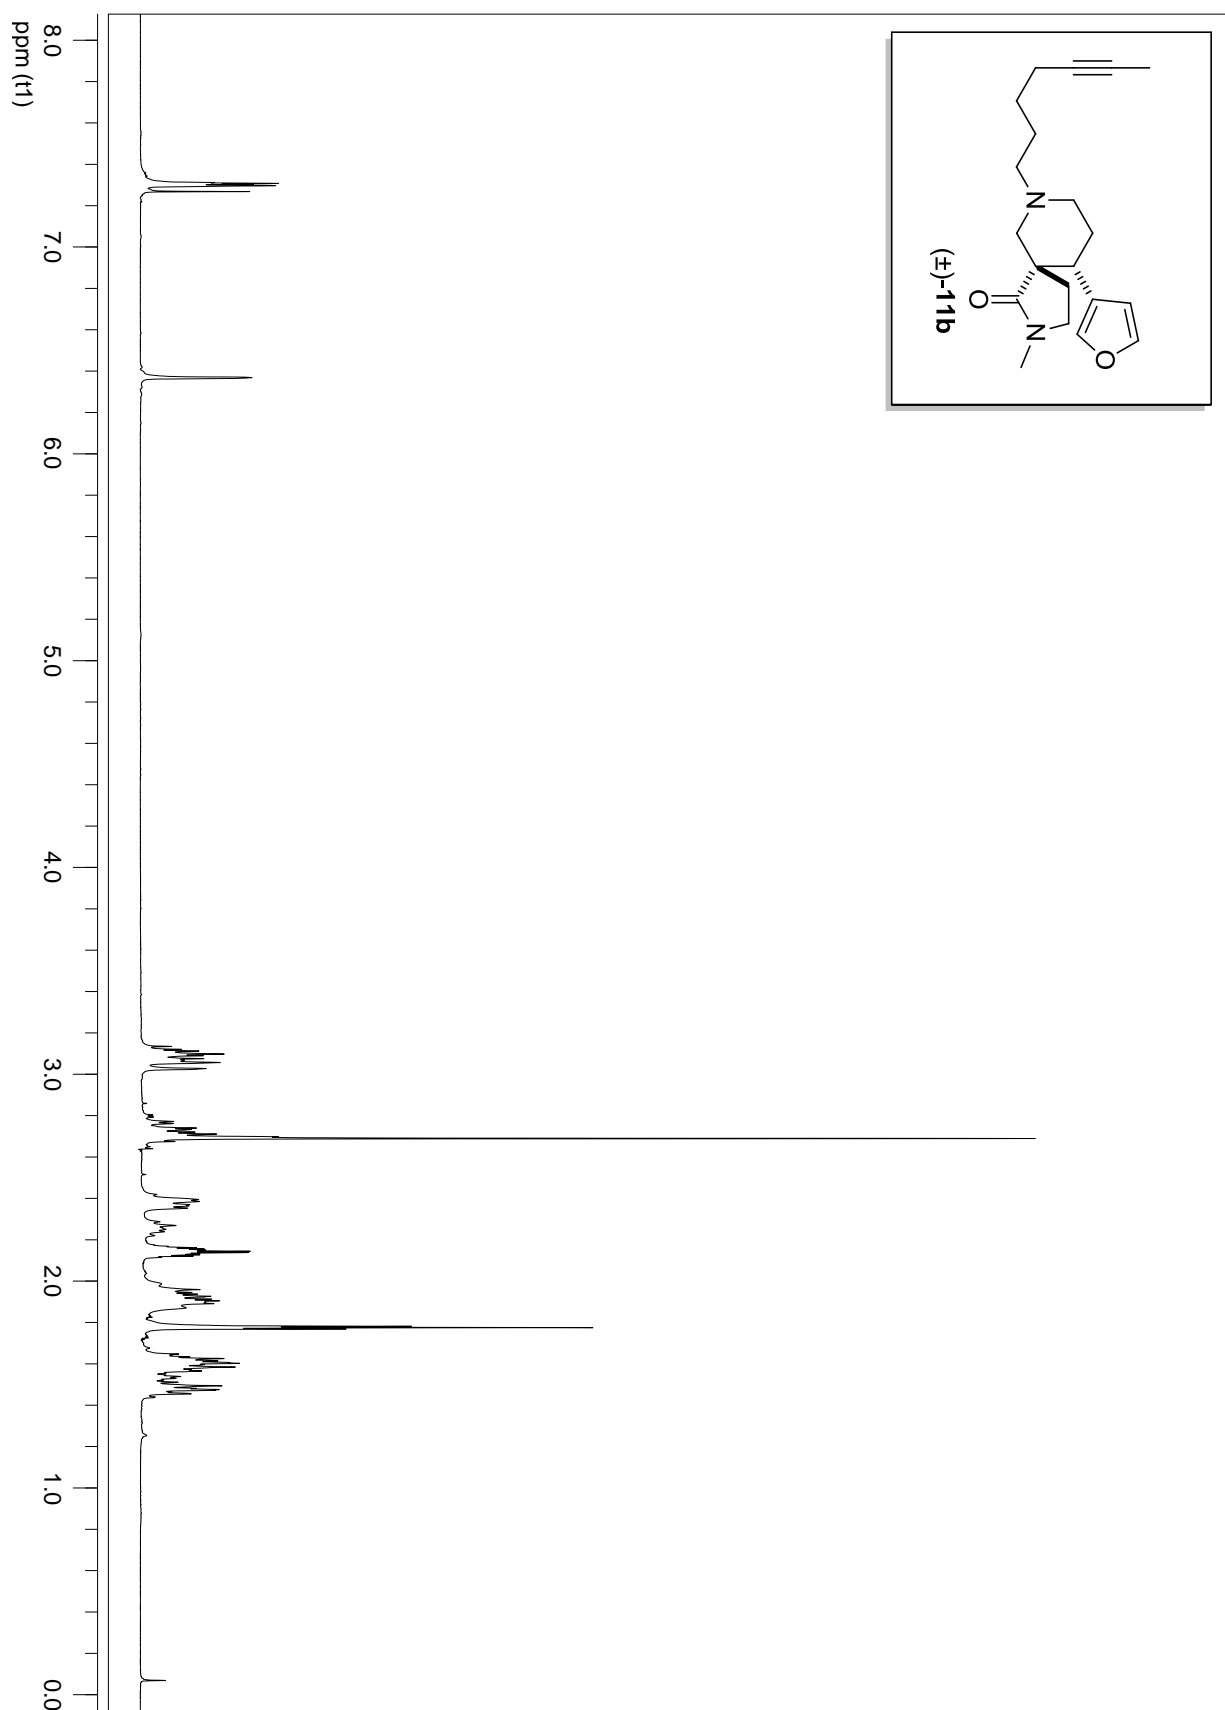



5.24.  $^{13}\text{C}$  NMR spectra of 11b

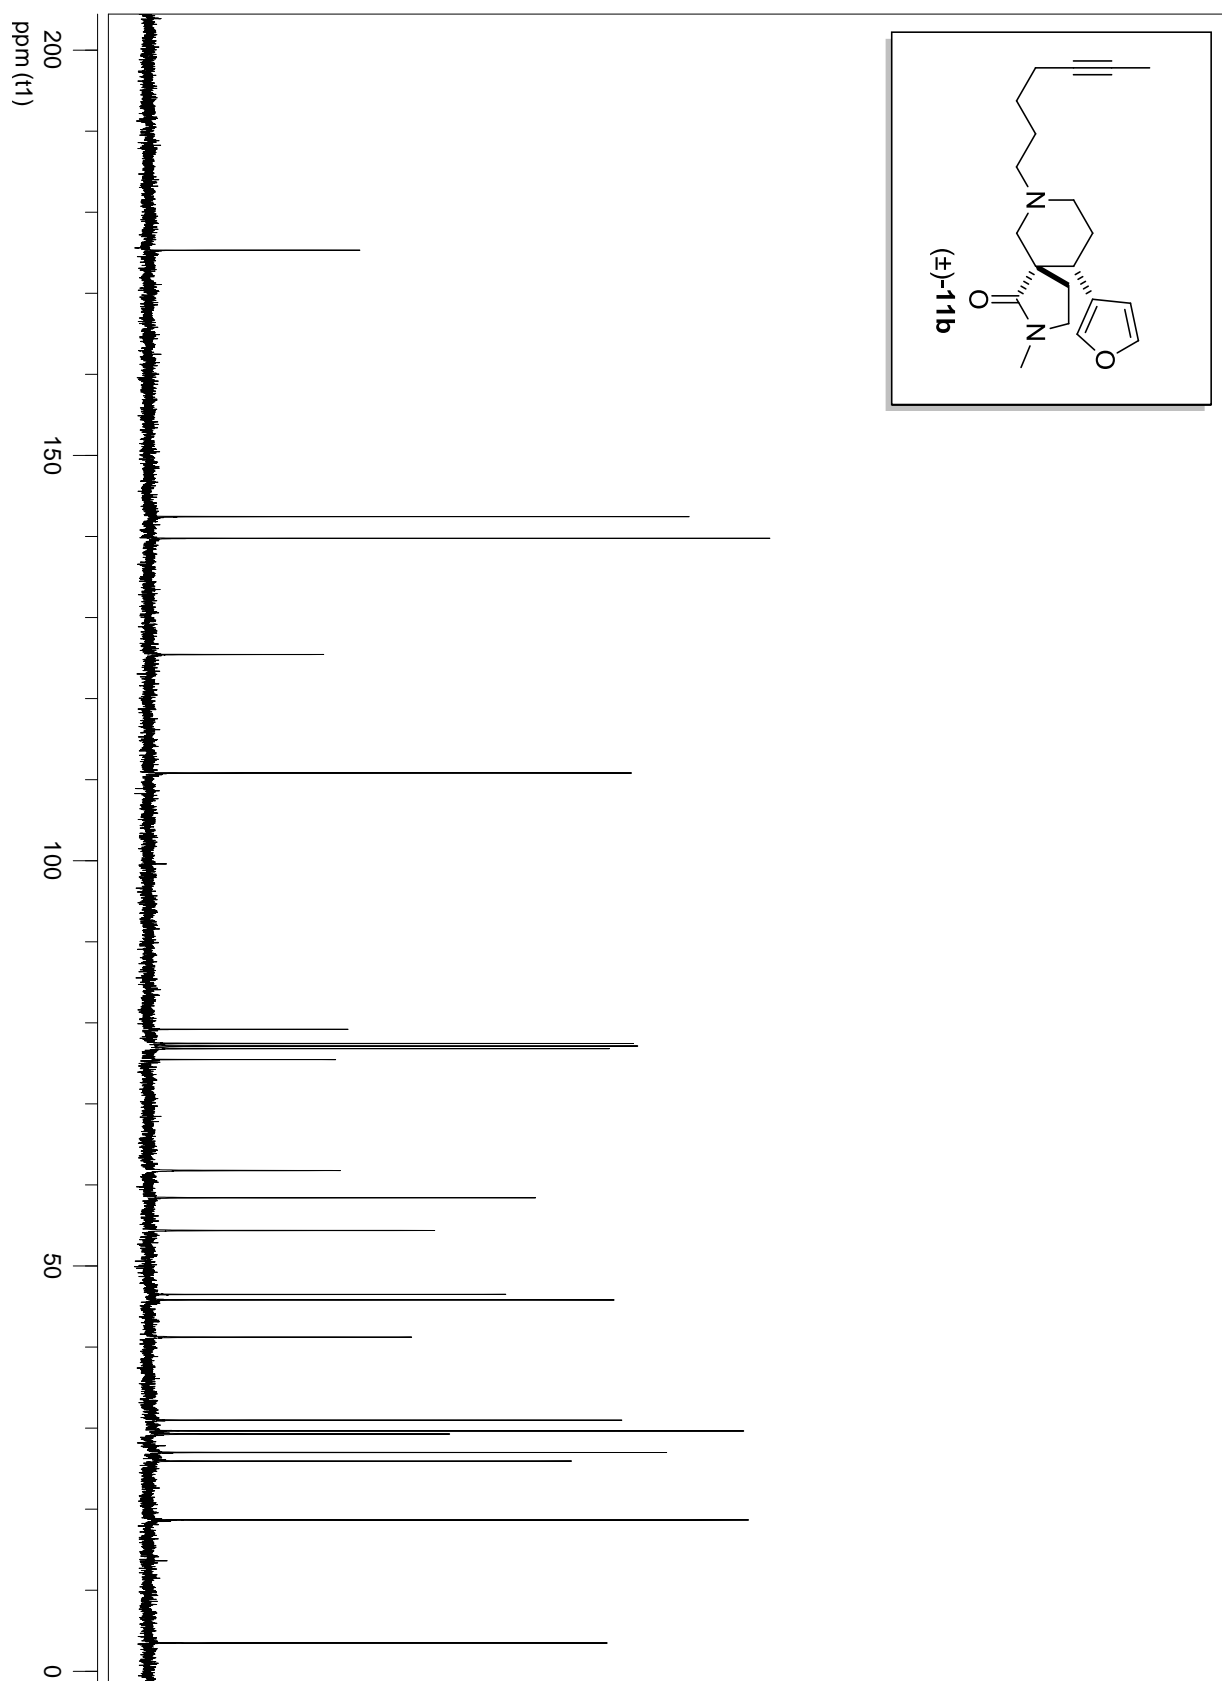

### 5.25. $^1\text{H}$ NMR spectra of 11c

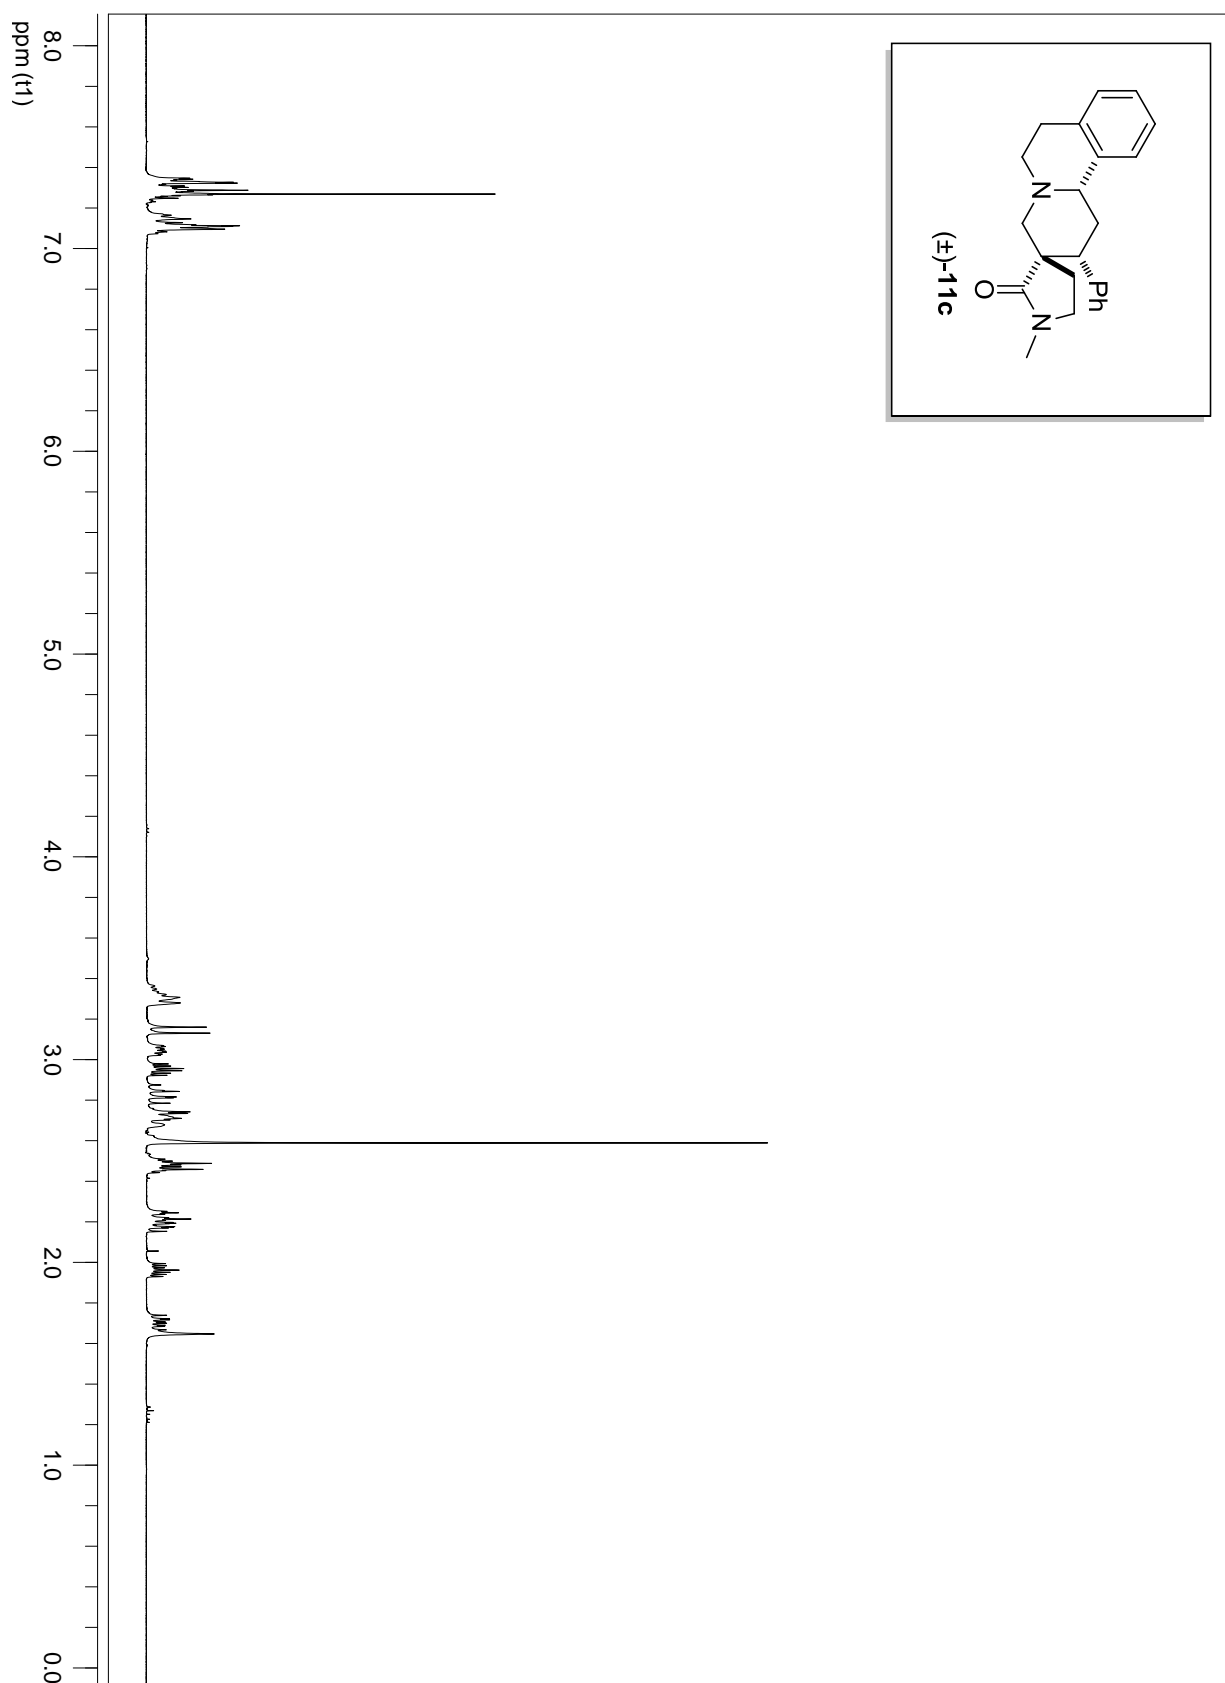

5.25.  $^{13}\text{C}$  NMR spectra of 11c

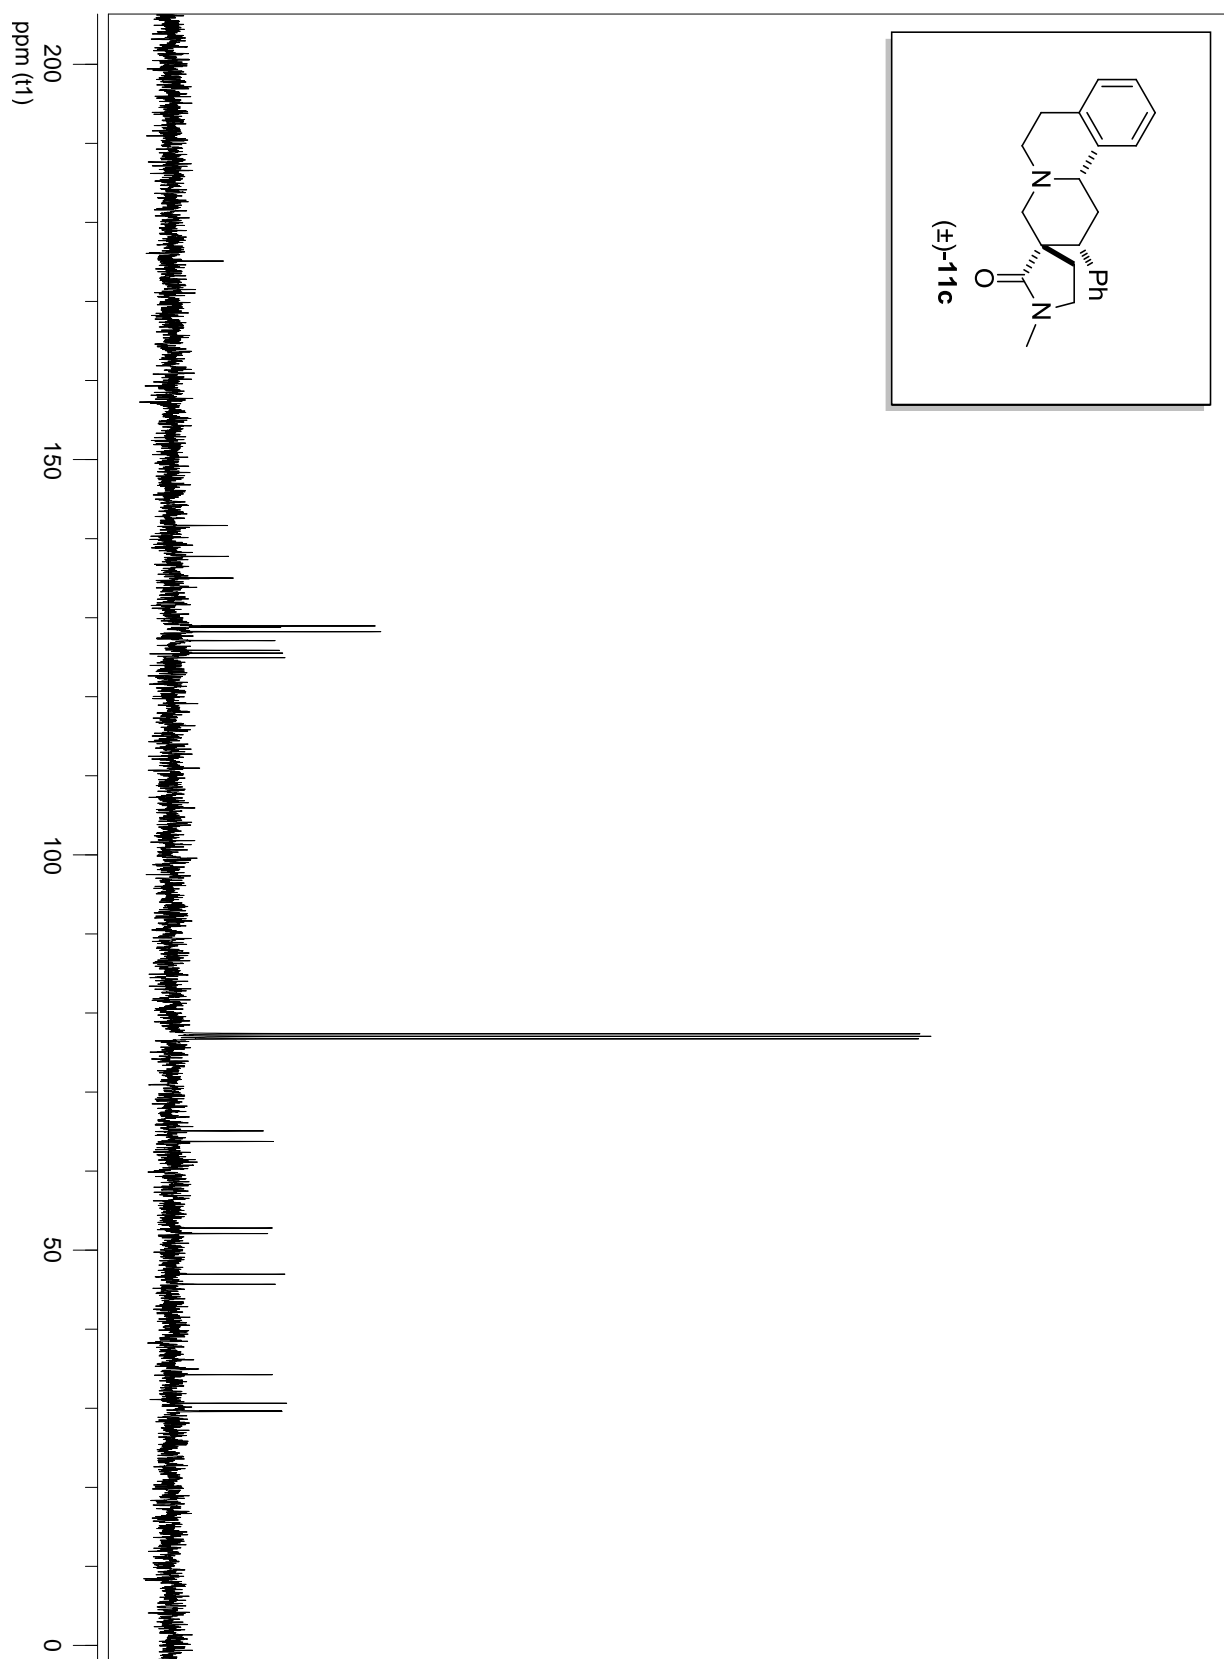

5.26.  $^1\text{H}$  NMR spectra of 12a

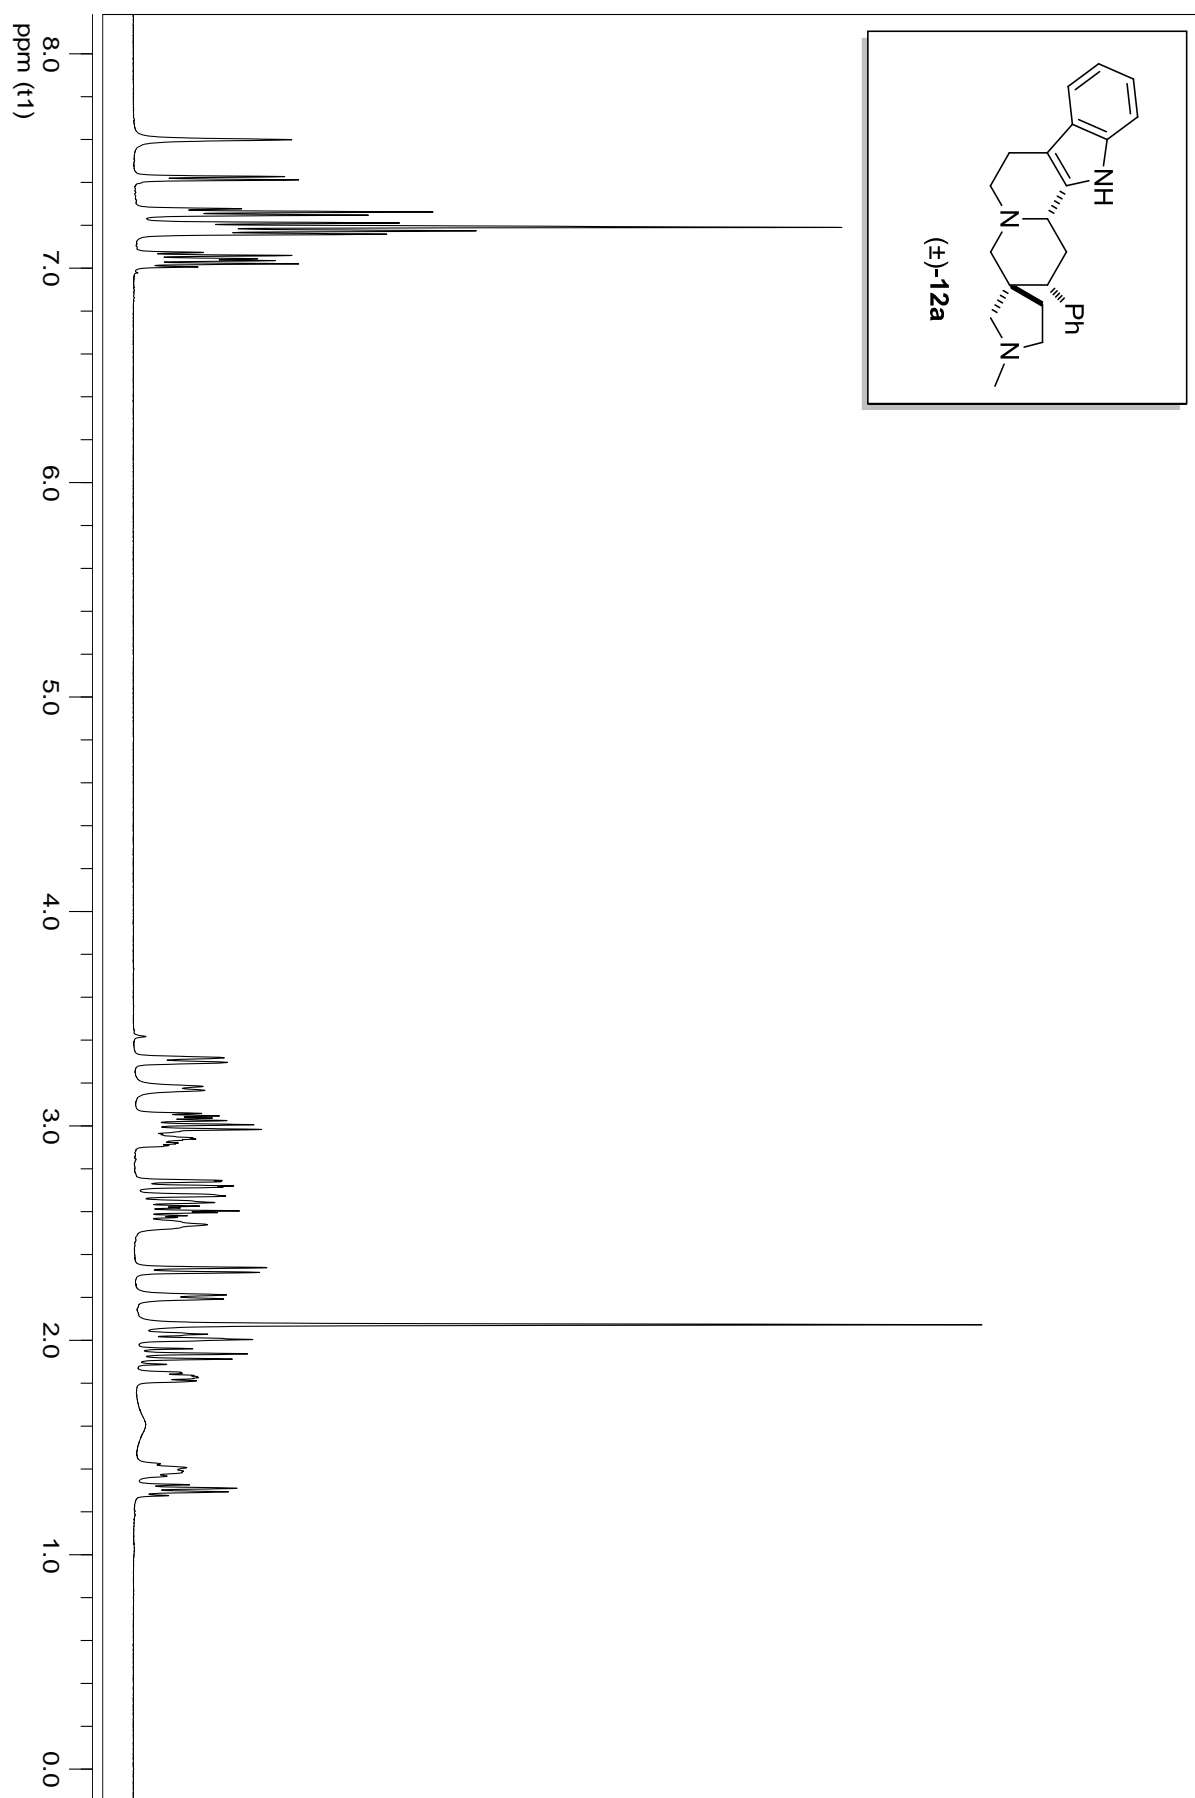

5.26.  $^{13}\text{C}$  NMR spectra of 12a

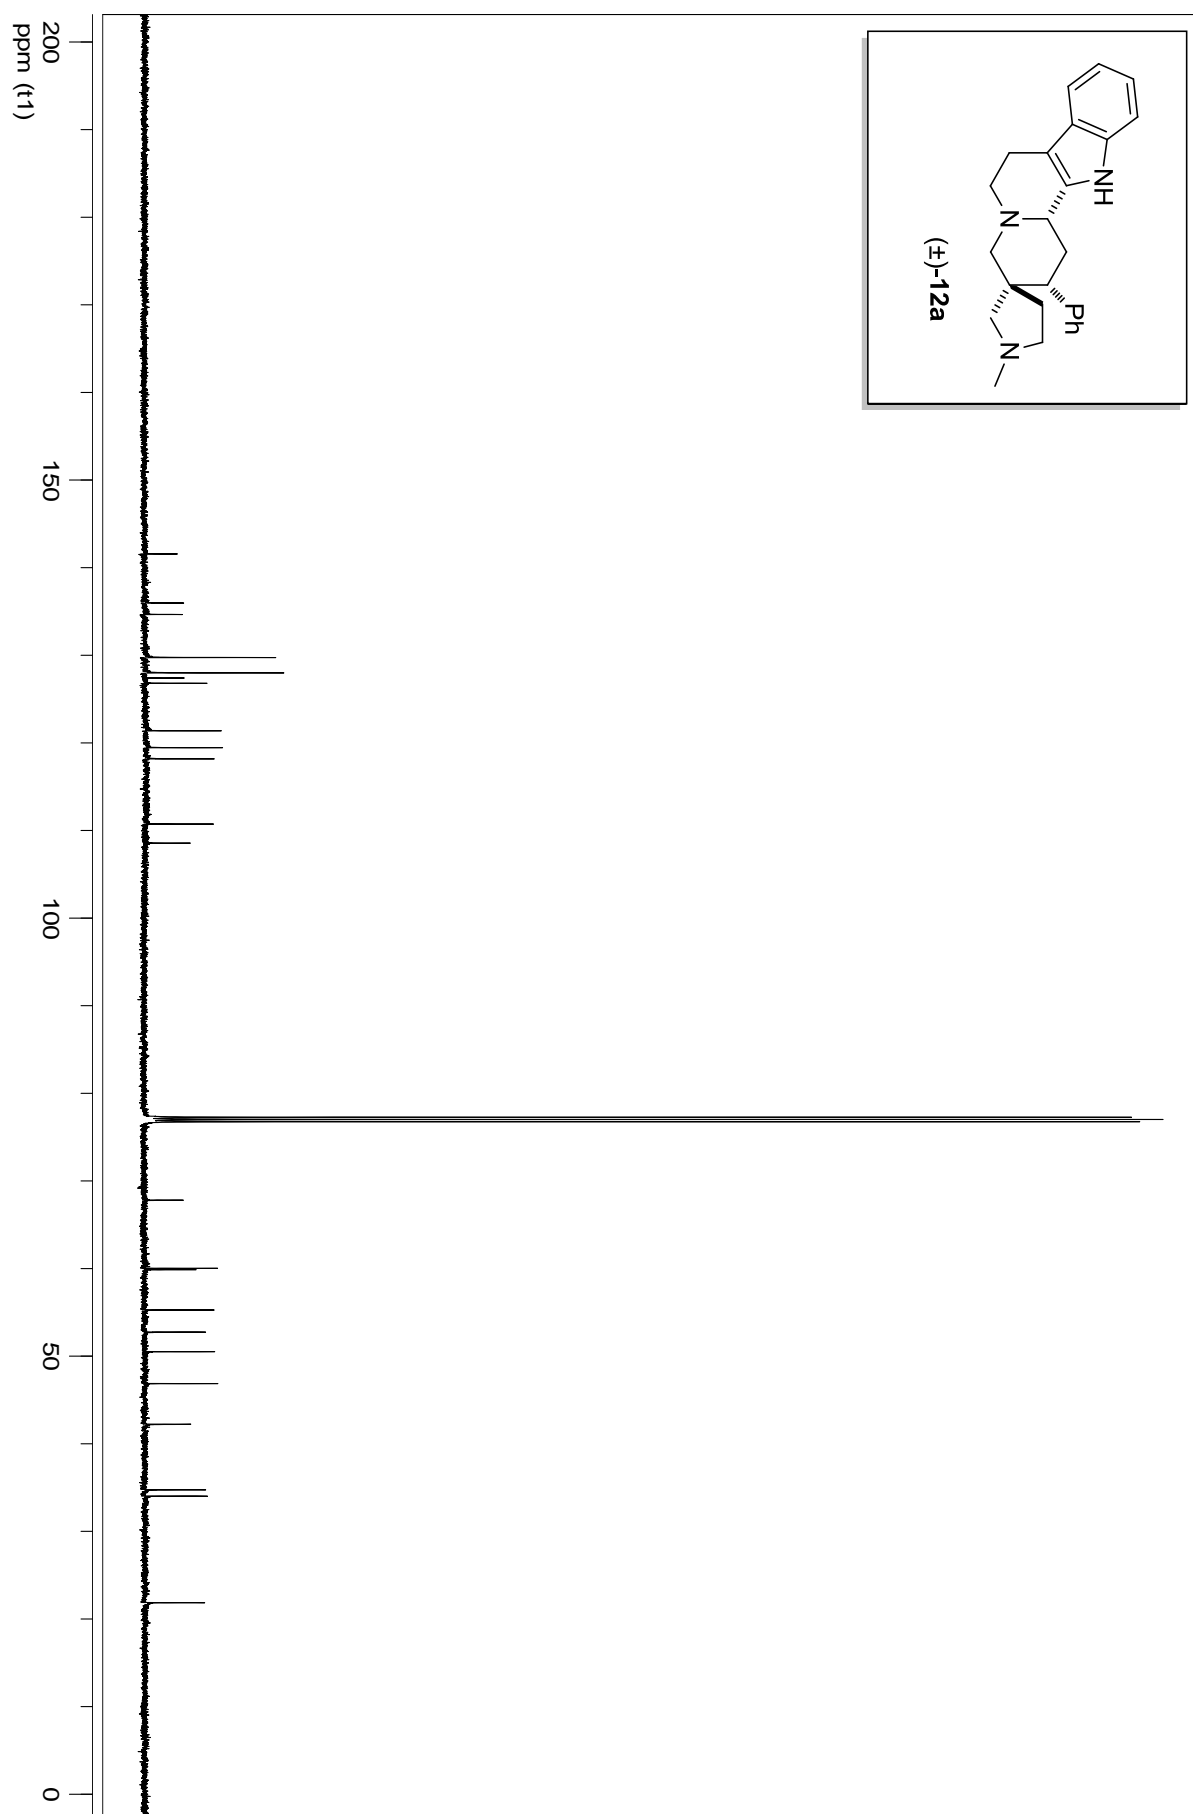

### 5.27 $^1\text{H}$ NMR spectra of 12b

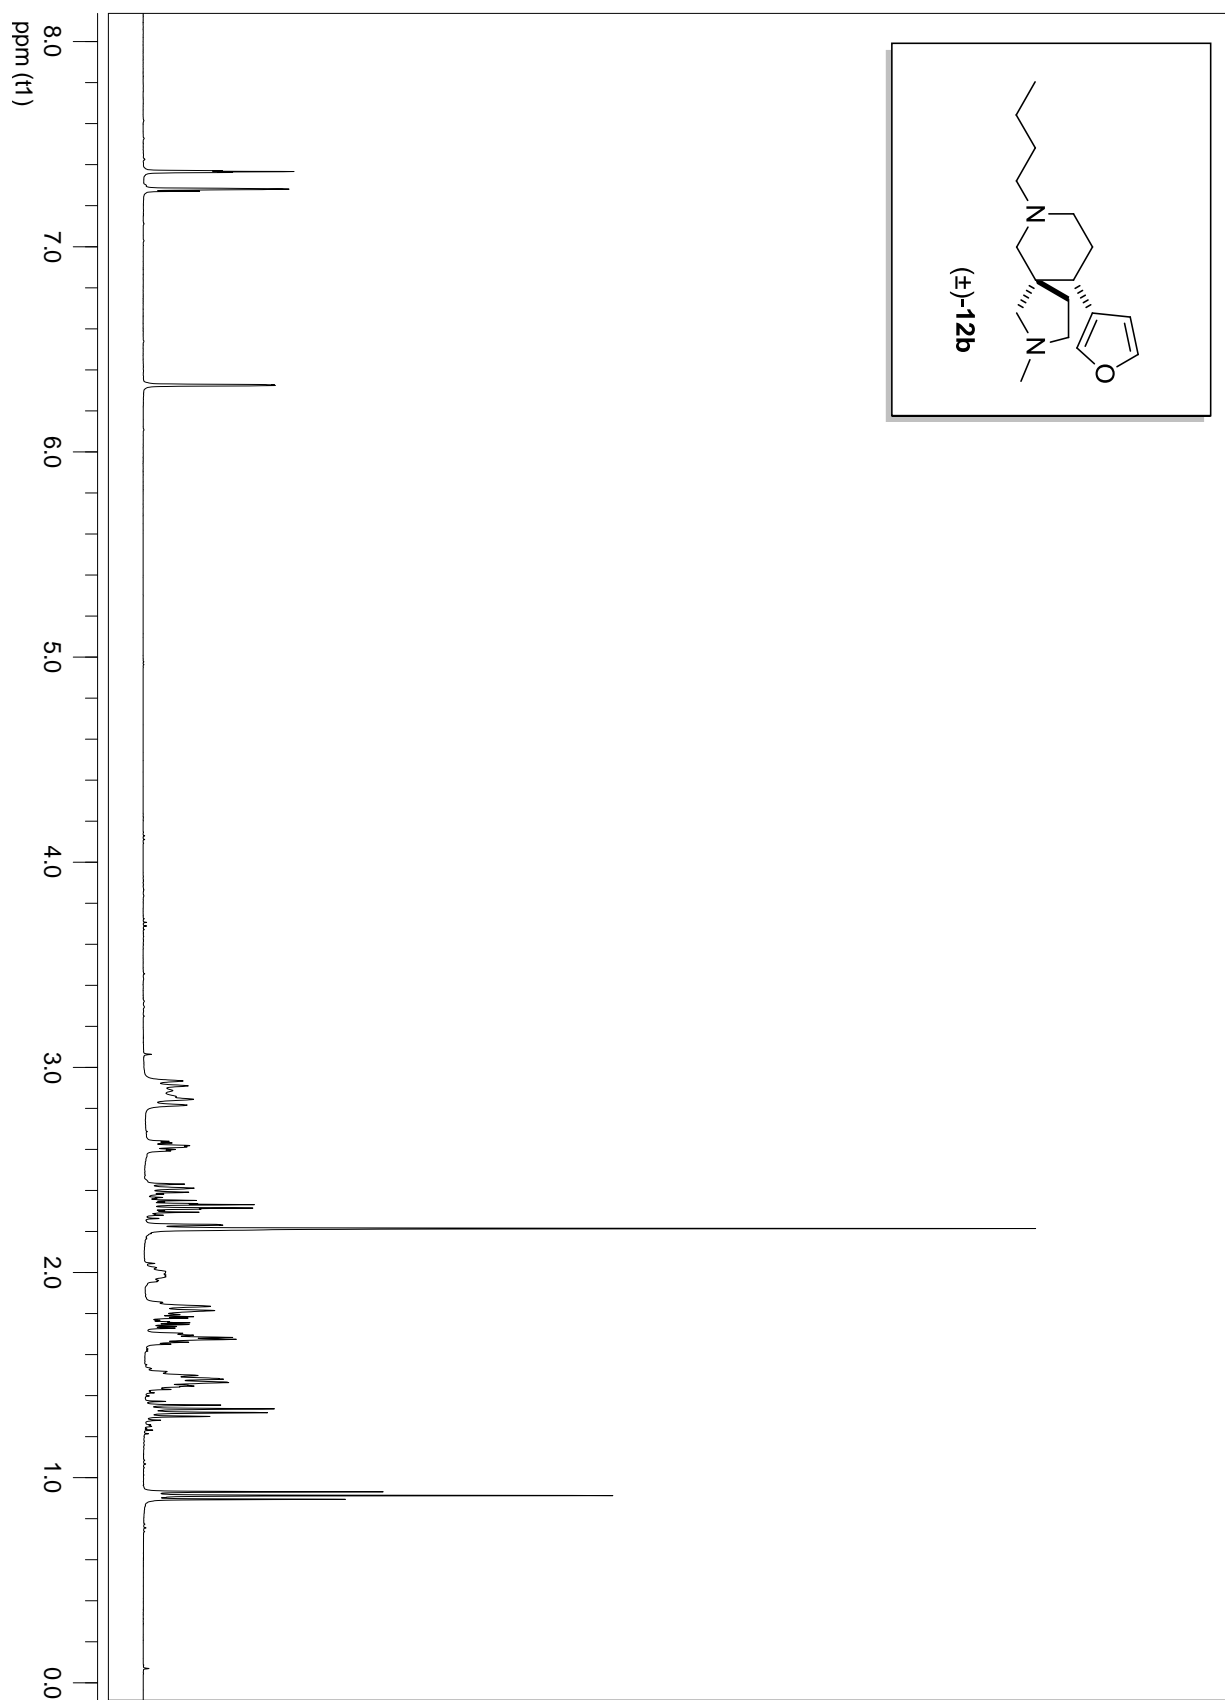

5.27.  $^{13}\text{C}$  NMR spectra of 12b

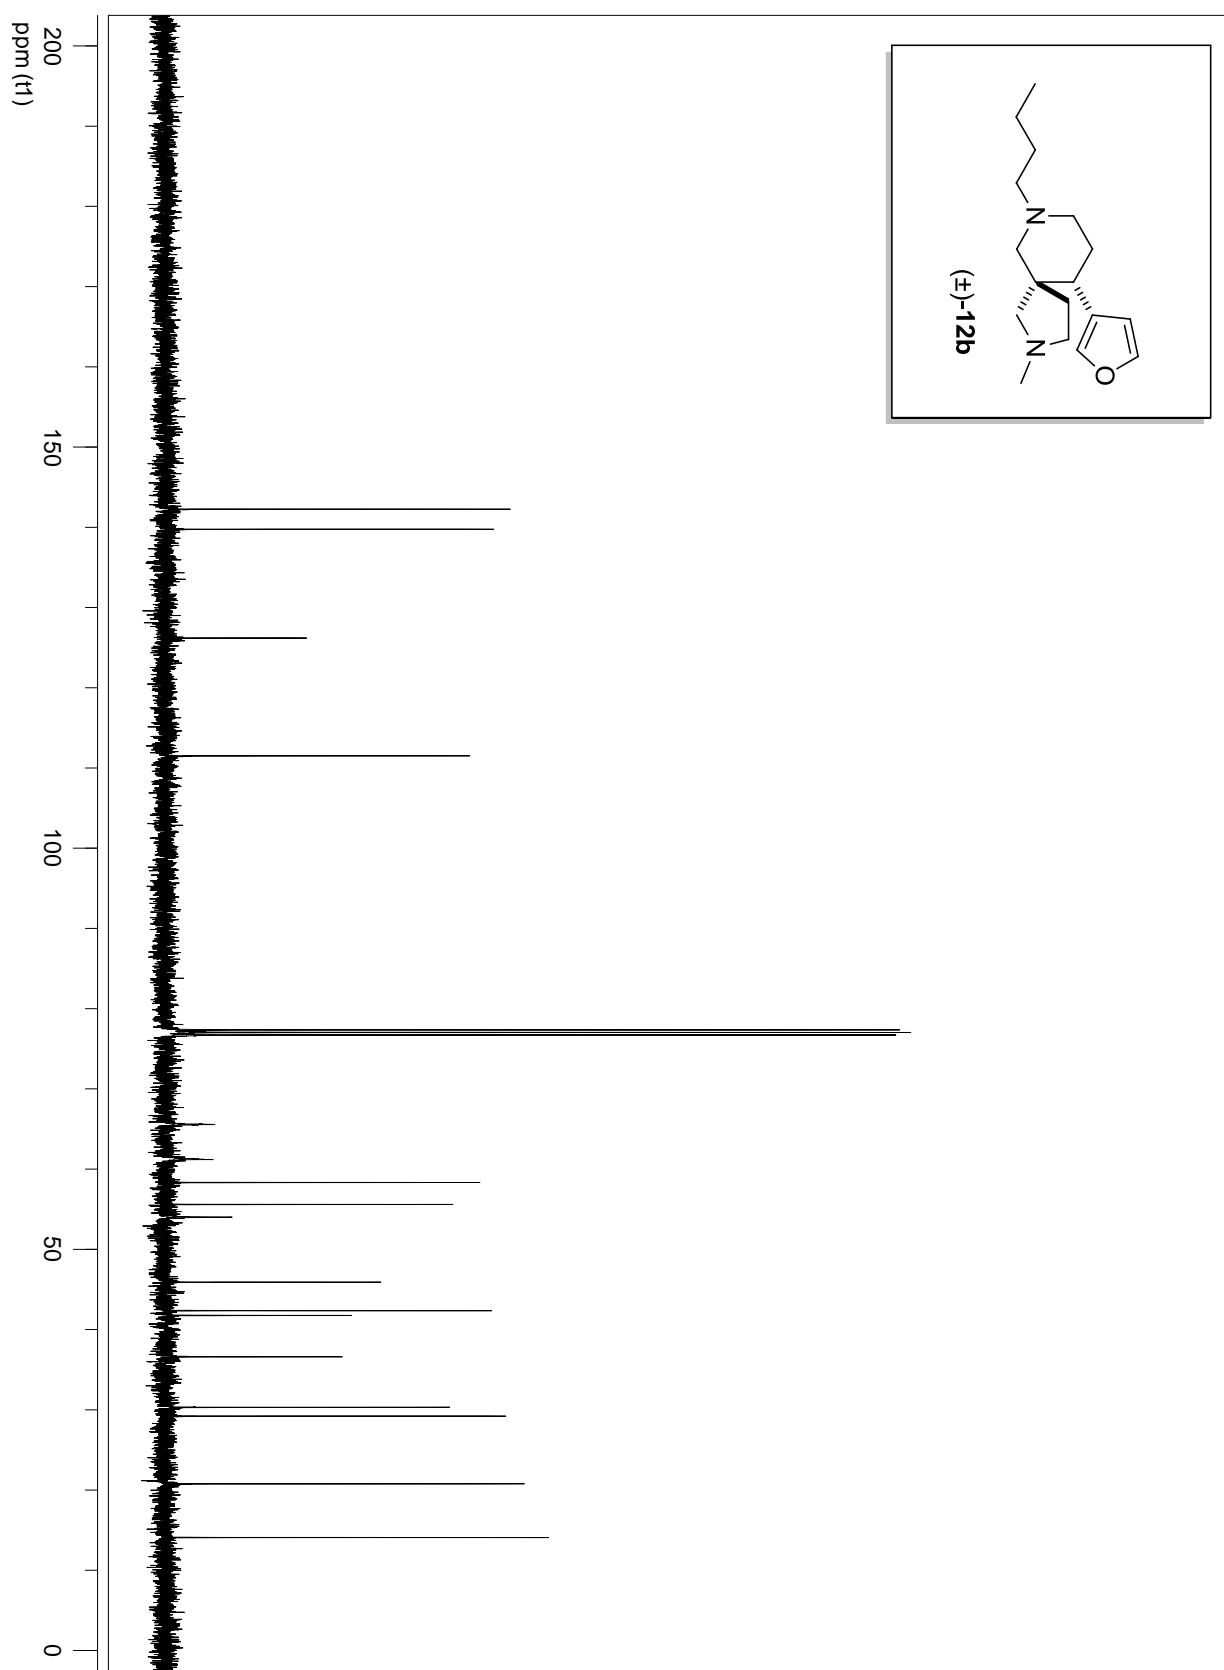

### 6.1. HPLC trace of (±)-1a

Sample Name: PJ 317 fr.11-21

|                 |                                       |            |           |
|-----------------|---------------------------------------|------------|-----------|
| Injection Date  | : 06/10/2007 16:03:06 PM              | Seq. Line  | : 1       |
| Sample Name     | : PJ 317 fr.11-21                     | Location   | : Vial 16 |
| Acq. Operator   | : Pavol                               | Ini        | : 1       |
| Acq. Instrument | : Instrument 1                        | Ini Volume | : 20 µl   |
| Acq. Method     | : C:\HPCHEM\1\METHODS\DJ26\50HEX230.M |            |           |
| Last changed    | : 06/10/2007 12:32:10 PM by Pavol     |            |           |
| Analysis Method | : C:\HPCHEM\1\METHODS\DJ26\90HEX220.M |            |           |
| Last changed    | : 05/10/2007 18:52:45 PM by Filippo   |            |           |
|                 | (modified after loading)              |            |           |

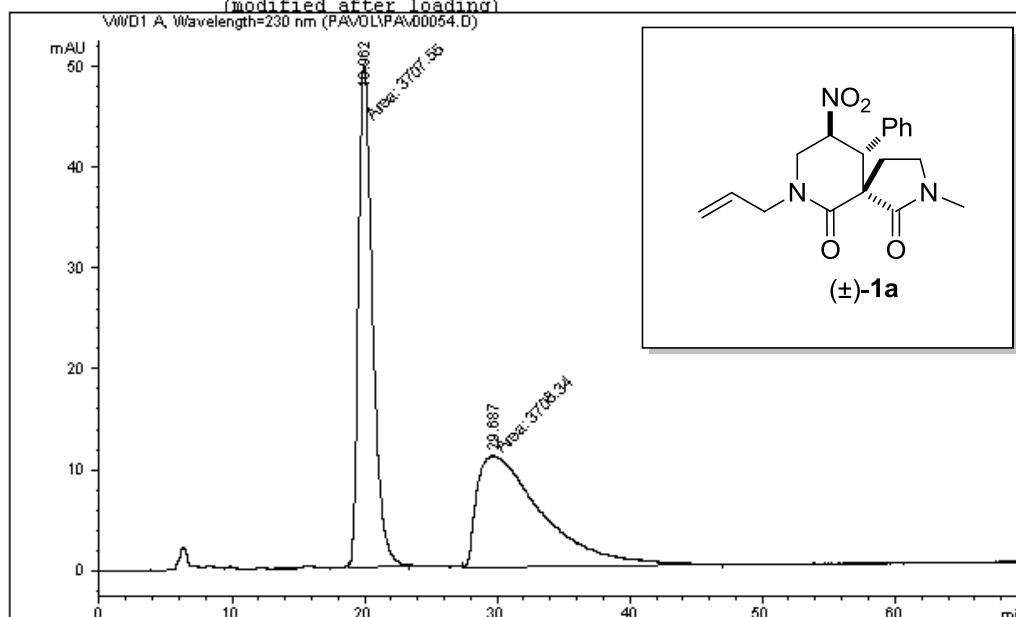

## Area Percent Report

```
Sorted By      :      Signal
Multiplier    :      1.0000
Dilution      :      1.0000
Use Multiplier & Dilution Factor with ISTDs
```

Signal 1: VWD1 A, Wavelength=230 nm

| Peak # | RetTime [min] | Type | Width [min] | Area [mAU*s] | Height [mAU] | Area %  |
|--------|---------------|------|-------------|--------------|--------------|---------|
| 1      | 19.962        | MM   | 1.2393      | 3707.54761   | 49.86132     | 49.9947 |
| 2      | 29.687        | MM   | 5.6334      | 3708.33813   | 10.97138     | 50.0053 |

|          |            |          |
|----------|------------|----------|
| Totals : | 7415.88574 | 60.83270 |
|----------|------------|----------|

Results obtained with enhanced integrator!

\*\*\* End of Report \*\*\*



## 6.2. HPLC trace of (+)-1a.

Data File C:\HPCHEM\1\DATA\PAVOL\PAV00058.D

Sample Name: PJ 407 fr.23-40

PJ 407 fr. 23-40 cryst., 50 hex230, 0.6 ml/ml, press 49  
barr.  
injection 20 microliters, column OD-H

```
=====
Injection Date : 06/10/2007 20:46:07 PM      Seq. Line :   5
Sample Name    : PJ 407 fr.23-40             Location  : Vial 20
Acq. Operator  : Pavol                       Inj       :   1
Acq. Instrument: Instrument 1                 Inj Volume: 20 µl
Acq. Method    : C:\HPCHEM\1\METHODS\DJD26\50HEX230.M
Last changed   : 06/10/2007 12:32:10 PM by Pavol
Analysis Method: C:\HPCHEM\1\METHODS\DJD26\90HEX220.M
Last changed   : 07/10/2007 13:29:08 PM by Filippo
                (modified after loading)
=====
```

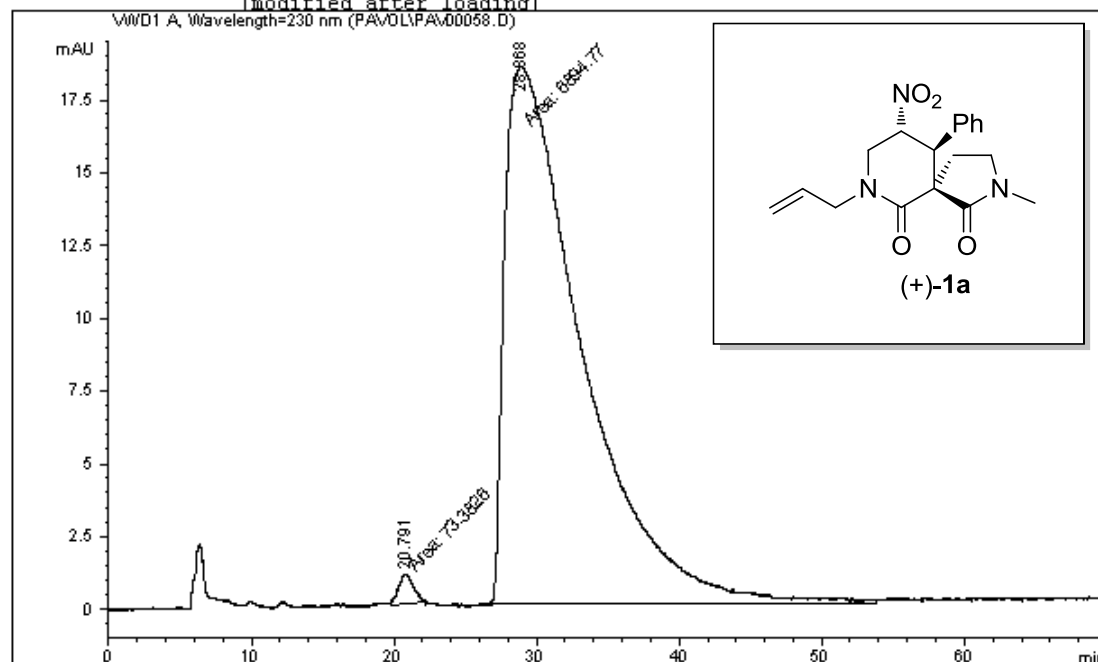

### Area Percent Report

```
=====
Sorted By      :      Signal
Multiplier     :      1.0000
Dilution       :      1.0000
Use Multiplier & Dilution Factor with ISTDs
=====
```

Signal 1: VWD1 A, Wavelength=230 nm

| Peak # | RetTime [min] | Type | Width [min] | Area [mAU*s] | Height [mAU] | Area %  |
|--------|---------------|------|-------------|--------------|--------------|---------|
| 1      | 20.791        | MM   | 1.2085      | 73.38259     | 1.01207      | 1.0531  |
| 2      | 28.868        | MM   | 6.2410      | 6894.76709   | 18.41252     | 98.9469 |

Totals : 6968.14968 19.42459

Results obtained with enhanced integrator!

\*\*\* End of Report \*\*\*
